1

2 **Tissue-specific versus pleiotropic enhancers within the *bric-a-brac* tandem gene duplicates**  
3 **display differential regulatory activity and evolutionary conservation**

4

5 Henri-Marc G. Bourbon<sup>1#</sup>, Mikhail H. Benetah<sup>1#</sup>, Emmanuelle Guillou<sup>1</sup>, Luis Humberto  
6 Mojica-Vazquez<sup>1, 3</sup>, Aissette Baanannou<sup>1, 4</sup>, Sandra Bernat-Fabre<sup>1</sup>, Vincent Loubiere<sup>2, 5</sup>,  
7 Frédéric Bantignies<sup>2</sup>, Giacomo Cavalli<sup>2</sup>, and Muriel Boube<sup>1\*</sup>

8

9 <sup>1</sup>Center for Integrative Biology, Molecular Cellular and Developmental (MCD) Biology Unit,  
10 Federal University of Toulouse, 118 Route de Narbonne, F-31062 Toulouse, France; <sup>2</sup>Institute  
11 of Human Genetics, UMR9002 CNRS/University of Montpellier, 141 Rue de la Cardonille, F-  
12 34396 Montpellier, France; <sup>3</sup>Genotoxicología Ambiental, Departamento de Ciencias  
13 Ambientales, Centro de Ciencias de la Atmósfera, Universidad Nacional Autónoma de México,  
14 Circuito Exterior s/n, Ciudad Universitaria Coyoacán, 04510, México, México; <sup>4</sup>Laboratory of  
15 Molecular and Cellular Screening Processes, Center of Biotechnology of Sfax, Sfax, Tunisia;  
16 <sup>5</sup>Research Institute of Molecular Pathology (IMP), Vienna BioCenter (VBC), Vienna, Austria;  
17 Medical University of Vienna, Vienna BioCenter (VBC), Vienna, Austria.

18

19 # Authors having contributed equally to this work.

20 \*Corresponding author: [muriel.boube-trey@univ-tlse3.fr](mailto:muriel.boube-trey@univ-tlse3.fr)

21

22

23 Running title: Differential enhancer conservation and activity within the *bric-a-brac* locus

24

## 25 **Abstract**

26 During animal evolution, de novo emergence and modifications of pre-existing transcriptional  
27 enhancers have contributed to biological innovations, by implementing gene regulatory  
28 networks. The *Drosophila melanogaster bric-a-brac (bab)* complex, comprising the tandem  
29 paralogous genes *bab1-2*, provides a paradigm to address how enhancers contribute and co-  
30 evolve to regulate jointly or differentially duplicated genes. We previously characterized an  
31 intergenic enhancer (named LAE) governing *bab2* expression in leg and antennal tissues. We  
32 show here that LAE activity also regulates *bab1*. CRISPR/Cas9-mediated LAE excision reveals  
33 its critical role for *bab2*-specific expression along the proximo-distal leg axis, likely through  
34 paralog-specific interaction with the *bab2* gene promoter. Furthermore, LAE appears involved  
35 but not strictly required for *bab1-2* co-expression in leg tissues. Phenotypic rescue experiments,  
36 chromatin features and a gene reporter assay reveal a large “pleiotropic” *bab1* enhancer (termed  
37 BER) including a series of *cis*-regulatory elements active in the leg, antennal, wing, haltere and  
38 gonadal tissues. Phylogenomics analyses indicate that (i) *bab2* originates from *bab1* duplication  
39 within the Muscomorpha sublineage, (ii) LAE and *bab1* promoter sequences have been  
40 evolutionarily-fixed early on within the Brachycera lineage, while (iii) BER elements have been  
41 conserved more recently among muscomorphans. Lastly, we identified conserved binding sites  
42 for transcription factors known or prone to regulate directly the paralogous *bab* genes in diverse  
43 developmental contexts. This work provides new insights on enhancers, particularly about their  
44 emergence, maintenance and functional diversification during evolution.

45 **Author summary**

46 Gene duplications and transcriptional enhancer emergence/modifications are thought having  
47 greatly contributed to phenotypic innovations during animal evolution. However, how  
48 enhancers regulate distinctly gene duplicates and are evolutionary-fixed remain largely  
49 unknown. The *Drosophila bric-a-brac* locus, comprising the tandemly-duplicated genes *bab1-*  
50 *2*, provides a good paradigm to address these issues. The twin *bab* genes are co-expressed in  
51 many tissues. In this study, genetic analyses show a partial co-regulation of both genes in the  
52 developing legs depending on tissue-specific transcription factors known to bind a single  
53 enhancer. Genome editing and gene reporter assays further show that this shared enhancer is  
54 also required for *bab2*-specific expression. Our results also reveal the existence of partly-  
55 redundant regulatory functions of a large pleiotropic enhancer which contributes to co-regulate  
56 the *bab* genes in distal leg tissues. Phylogenomics analyses indicate that the *Drosophila bab*  
57 locus originates from duplication of a dipteran *bab1*-related gene, which occurred within the  
58 Brachycera (true flies) lineage. *bab* enhancer and promoter sequences have been differentially-  
59 conserved among Diptera suborders. This work illuminates how transcriptional enhancers from  
60 tandem gene duplicates (i) differentially interact with distinct cognate promoters and (ii)  
61 undergo distinct evolutionary changes to diversifying their respective tissue-specific gene  
62 expression pattern.

63

## 64 **Introduction**

65 Gene duplications have largely contributed to create genetic novelties during evolution (1, 2).  
66 Intra-species gene duplicates are referred to as “paralogs”, which eventually diverged  
67 functionally during evolution in a phylogenetic manner. Gene family expansion has facilitated  
68 phenotypic innovation through (i) acquisition of new molecular functions or (ii) the subdivision  
69 of the parental gene function between the duplicate copies (3-5). Phenotypic novelties are  
70 thought having originated mainly from evolutionary emergence or modifications of genomic  
71 Cis-Regulatory Elements (CREs) or modules, most often dubbed as “enhancer” regions, which  
72 regulate gene transcription in a stage-, tissue- and/or cell-type-specific manner (6-10). How  
73 CRE (enhancers) within gene complexes (i) are distinctly interacting with their cognate  
74 promoters and (ii) are differentially (co-)evolving remain largely unknown.

75 The *Drosophila melanogaster bric-a-brac (bab)* locus comprises two tandemly-duplicated  
76 genes (Fig 1A), *bab1-2*, which encode paralogous transcription factors sharing two conserved  
77 domains: (i) a Bric-a-brac/Tramtrack/Broad-complex (BTB) domain involved in protein-  
78 protein interactions, and (ii) a specific DNA-binding domain (referred to as BabCD, for Bab  
79 Conserved Domain), in their amino(N)- and carboxyl(C)-terminal moieties, respectively (11).  
80 Bab1-2 proteins are co-expressed in many tissues (11, 12). In the developing abdominal  
81 epidermal cells, within so-called histoblast nests, they jointly regulate directly *yellow*  
82 expression in a sexually-dimorphic manner, thus controlling adult male versus female body  
83 pigmentation traits (13-16). *bab1-2* co-expression in the developing epidermal histoblast nests  
84 is partially governed by two CREs which drive reporter gene expression (i) in a monomorphic  
85 pattern in the abdominal segments A2-A5 of both sexes (termed AE, for “Anterior Element”),  
86 and (ii) in a female-specific pattern in the A5-A7 segments (DE, for “Dimorphic Element”) (Fig  
87 1A) (14, 17). In addition to controlling male-specific abdominal pigmentation traits, *bab1-2* are  
88 required, singly, jointly or in a partially-redundant manner, for embryonic cardiac development,

89 sexually-dimorphic larval somatic gonad formation, salivary glue gene repression, female  
90 oogenesis, wing development as well as distal leg (tarsal) and antennal segmentation (11, 13,  
91 17-24). In addition to abdominal AE and DE, two other *bab* enhancers, termed CE and LAE  
92 (see Fig 1A), have been characterized, which recapitulate *bab2* expression in embryonic cardiac  
93 cells and developing tarsal as well as distal antennal cells, respectively (17, 21, 25).

94 Adult T1-3 legs, on the pro-, meso- and meta-thoraces, respectively, are derived from distinct  
95 mono-layered epithelial cell sheets, organized as sac-like structures, called leg imaginal discs  
96 (hereafter simply referred to as leg discs) (26-28). Upon completion of the third-instar larval  
97 stage (L3), each leg disc is already patterned along the proximo-distal (P-D) axis through  
98 regionalized expression of the Distal-less (Dll), Dachshund (Dac) and Homothorax (Hth)  
99 transcriptional regulators in the distal (center of the disc), medial and proximal (peripheral)  
100 regions, respectively (26). The five (ts1-5) tarsal and the single pretarsal (distalmost) segments  
101 are patterned through genetic cascades mobilizing transcription factors, notably the distal  
102 selector protein Dll and the tarsal Rotund protein as well as nuclear effectors of Notch and  
103 Epidermal Growth Factor Receptor (EGFR) signaling, i.e., Bowl and C15, respectively (26,  
104 27).

105 While both *bab* genes are required for dimorphic abdominal pigmentation traits and somatic  
106 gonad specification (13, 22), only *bab2* is critical for tarsal segmentation (11). While *bab1* loss-  
107 of-function legs are apparently wild-type, a null allele (*bab*<sup>AR07</sup>) removing *bab2* (and *bab1*)  
108 activities causes segmental transformation along the P-D leg axis, notably sex comb teeth in  
109 tarsal segments ts2-3 of male forelegs, normally only found in ts1, as well as ts2-5 tarsal fusions  
110 in both genders (11). While the two *bab* genes are co-expressed within ts1-4 cells, *bab2* is  
111 expressed more proximally than *bab1* in ts1, and in a graded manner along the P-D leg axis in  
112 ts5 (11, 29). We previously showed that *bab2* expression in distal leg (and antennal) tissues is  
113 governed by a 567-bp-long CRE/enhancer (termed LAE for “Leg and Antennal Enhancer”)

114 which is situated between the *bab1-2* transcription units (Fig 1A) (17, 25). However, LAE  
115 enhancer contribution to *bab1-2* co-regulation in the developing distal legs remains to be  
116 investigated in tarsal segments ts3-4 where expression levels of both paralogous BTB-BabCD  
117 proteins are the highest (see Fig 1B) (11).

118 Here, we show that *bab1* expression in the developing distal leg also depends on the Rotund,  
119 Bowl and C15 proteins, three transcription factors known to regulate directly *bab2* expression,  
120 by binding to dedicated LAE sequences (17, 25). LAE excision by CRISPR/Cas9-mediated  
121 genome editing indicates that this enhancer is partly involved in *bab1-2* co-regulation and, more  
122 unexpectedly, is also required for their differential expression along the P-D leg axis.  
123 Additionally, we show that LAE acts redundantly with a large enhancer signature region  
124 (termed BER), located within the *bab1* transcription unit, which is bound by dedicated  
125 transcription factors involved in diverse developmental processes and thus BER is prone to act  
126 as a “pleiotropic” enhancer region. Our phylogenomics analyses indicate that LAE and *bab1*  
127 promoter sequences have been fixed early on during dipteran evolution, well before *bab1*  
128 duplication. Conversely, BER and *bab2* promoter sequences have been fixed much later. Lastly,  
129 within *D. melanogaster* BER, we identified conserved binding sites for many transcriptional  
130 regulators known or prone to regulate *bab1* and/or *bab2* expression in the developing leg and  
131 antenna, but also in wing, haltere, mesodermal and gonadal tissues. This work illuminates how  
132 transcriptional enhancers from tandem gene duplicates (i) differentially interact with distinct  
133 cognate promoters and (ii) undergo distinct evolutionary changes to diversifying their  
134 respective tissue-specific gene expression pattern.

135

## 136 **Results**

### 137 **The tandem *bab1-2* gene paralogs are co-regulated in the developing distal leg**

138 In addition to the distal selector homeodomain (HD) protein Distal-less, we and others have  
139 previously shown that the C15 HD protein (homeoprotein) as well as Rotund and Bowl Zinc-  
140 Finger (ZF) transcription factors (TFs) bind dedicated sequences within LAE to ensure precise  
141 *bab2* expression in four concentric tarsal rings within the leg discs (Fig 1B) (17, 25). *bab1-2*  
142 are co-expressed in ts2-4 tarsal segments, while *bab2* is specifically expressed in ts5 and more  
143 proximally than *bab1* in ts1, both in a graded manner along the P-D leg axis (Fig 1C and S1A  
144 Fig) (11). Given *bab1-2* co-expression in ts1-4, we first asked whether *C15*, *rotund* and *bowl*  
145 activities are also controlling *bab1* expression in the developing distal leg. To this end, we  
146 compared Bab1 expression with that of a X-linked *LAE-GFP* (or *LAE-RFP*) reporter gene  
147 faithfully reproducing the *bab2* expression pattern there (17, 25), in homozygous mutant leg  
148 discs for a null *C15* allele or in genetically-mosaic leg discs harboring *rotund* or *bowl* loss-of-  
149 function mutant cells (Fig 1D-F).

150 *C15* is specifically activated in the distalmost (center) part of the leg disc giving rise to the  
151 pretarsal (pt) segment (see Fig 1B) (30, 31). We have previously shown that the C15  
152 homeoprotein down-regulates directly *bab2* to restrict its initially broad distal expression to the  
153 tarsal segments (25). Bab1 expression analysis in a homozygous *C15* mutant leg disc revealed  
154 that both *bab1* and *LAE-RFP* (*bab2*) are similarly de-repressed in the pretarsus (Fig 1, compare  
155 panels C-D).

156 In contrast to *C15*, *rotund* expression is restricted to the developing tarsal segments (32) and  
157 the transiently-expressed Rotund ZF protein contributes directly to *bab2* up-regulation in  
158 proximal (ts1-2) but has no functional implication in distal (ts3-5) tarsal cells (17).  
159 Immunostaining of genetically-mosaic leg discs at the L3 stage revealed that *bab1* is cell-  
160 autonomously down-regulated in large *rotund* mutant clones in ts1-2, but not in ts3-4 segments  
161 (Fig 1E), as it is the case for *LAE-GFP* reflecting *bab2* expression. Lastly, we examined whether  
162 the Bowl ZF protein, a repressive TF active in pretarsal but not in most tarsal cells, is down-

163 regulating *bab1* expression there (33), like *bab2* (25). Both *bab1* and *LAE-RFP (bab2)* appeared  
164 cell-autonomously de-repressed in *bowl* loss-of-function pretarsal clones (Fig 1F).

165 In addition to loss-of-function, we also conducted gain-of-function experiments for *bowl* and  
166 *rotund*. Bowl TF gain-of-function was achieved by down-regulating *lines* which encodes a  
167 related but antagonistic ZF protein (i) destabilizing nuclear Bowl and is specifically expressed  
168 in the tarsal territory (33). As previously shown for *LAE-GFP* (and *bab2*) expression, nuclear  
169 Bowl stabilization in the developing tarsal region appears sufficient to down-regulate cell-  
170 autonomously *bab1* (S1C Fig). Prolonged expression of the Rotund protein in the entire distal  
171 part of the developing leg disc, i.e., tarsal in addition to pretarsal primordia, induces ectopic  
172 *bab1* expression-in the presumptive pretarsal territory, albeit with some differences with *bab2*  
173 expression (S1B Fig, differentially-expressing cells are indicated with arrows), thus suggesting  
174 differential sensitivity of the two gene duplicates to Rotund TF levels (see discussion).

175 Taken together, these data indicate that the C15, Bowl and Rotund transcription factors,  
176 previously shown to interact physically with specific LAE sequences and thus to regulate  
177 directly *bab2* expression in the developing distal leg, are also regulating *bab1* expression there.  
178 These results suggest that the limb-specific intergenic LAE enhancer activity regulates directly  
179 both *bab* genes.

180

### 181 **LAE activity regulates both *bab1* and *bab2* gene paralogs along the proximo-distal leg axis**

182 To test the role of LAE in regulating *bab1-2*, we deleted precisely the LAE sequence through  
183 CRISPR/Cas9 genome editing (see Materials and Methods) (Fig 2A). Two independent  
184 deletion events (termed  $\Delta$ *LAE-M1* and *-M2*; see S2 Fig for deleted DNA sequences) were  
185 selected for phenotypic analysis. Both are homozygous viable and give rise to fertile adults with  
186 identical fully-penetrant distal leg phenotypes, namely ectopic sex-comb teeth on *ts2* (normally



187 only found on ts1) tarsal segment in the male prothoracic (T1) legs (Fig 2B), which are typical  
188 of *bab2* hypomorphic alleles (11). The  $\Delta$ LAE-M1 allele was selected for detailed phenotypic  
189 analyses and is below referred to as *bab*<sup>ALAE</sup>.

190 First, we quantified *bab1* and *bab2* mRNAs prepared from dissected wild-type and homozygous  
191 *bab*<sup>ALAE</sup> mutant leg discs. As shown in Fig 2C, both mRNAs were detected in mutant discs,  
192 although *bab1* levels were two times lower than wild-type. Second, Bab1-2 expression patterns  
193 were analyzed in homozygous *bab*<sup>ALAE</sup> leg discs (Fig 3). To identify leg cells that should  
194 normally express *bab2*, we used the X-linked LAE-GFP reporter. In homozygous *bab*<sup>ALAE</sup>  
195 mutant leg discs, *bab2* specific expression (see Fig. 1B) is no longer observed (Fig 3B-C), while  
196 Bab1-2 shared expression is very low in ts3-4 to undetectable in ts1-2. Nevertheless, residual  
197 *bab1-2* co-expression in homozygous *bab*<sup>ALAE</sup> mutant discs indicates that additional *cis*-  
198 regulatory region(s) within the *bab* locus act(s), at least partly, redundantly with the LAE  
199 enhancer.

200 Taken together, our data indicate that LAE enhancer activity is (i) required for *bab1-2* co-  
201 expression in the two proximal-most tarsal segments, particularly ts1, (ii) dispensable for their  
202 co-expression in ts3-4, suggesting the presence of redundant *cis*-regulatory information and (iii)  
203 critically required for *bab2*-specific tarsal expression both proximally and distally. Thus, LAE  
204 activity governs both shared and paralog-specific expression of the *bab1-2* gene duplicates.

205

## 206 **LAE paralog-specific activity requires the *bab2* core promoter**

207 Whereas enhancer emergence has been proposed to account for acquisition of novel tissue- or  
208 paralog-specific functions for gene duplicates (34-36), LAE regulatory function provides an  
209 example of a single enhancer responsible both for shared and differential expression of two  
210 tandemly-repeated gene paralogs. Previously tested LAE reporter constructs fused *bab2* core

211 promoter sequences to the minimal *Hsp70* promoter region (*pHsp70*) (17, 25). To examine the  
212 contribution of the *bab2* promoter to LAE activity we compared the expression of two LAE  
213 reporters containing (*LAE-RFP*) or not (*LAE-pHsp70only-GFP*) the *bab2* promoter sequence  
214 (Fig 3D). Strikingly, the *LAE-pHsp70only-GFP* reporter was no longer activated in *RFP+*  
215 (*bab2*-expressing) ts1 and ts5 cells (Fig 3E; see white brackets and arrows). These data indicate  
216 that *bab2*-specific regulation by LAE activity requires the *bab2* core promoter sequences.

217

218 **In addition to the intergenic LAE, other leg-specific enhancer elements are present within**  
219 **the *bab1* first intron**

220 Since LAE appeared dispensable for *bab1-2* co-expression in ts3-4 cells, our data suggested the  
221 existence of other redundant *cis*-regulatory elements, presumably located also within the *bab*  
222 locus. On one side, a X-linked Bacterial Artificial Chromosome (BAC) construct,  
223 *BAC26B15<sup>ZH2A</sup>*, encompassing the *bab2* gene and downstream intergenic sequence including  
224 LAE (see Fig 4A), could rescue (i) Bab2 expression in the tarsal primordium and (ii), distal leg  
225 phenotypes detected in homozygous animals for the null allele *bab<sup>AR07</sup>* (17). On the other side,  
226 a *BAC26B15* construct (*BAC26B15 $\Delta$ LAE<sup>ZH2A</sup>*) inserted at the same genomic landing site and  
227 specifically lacking LAE sequence did not (Fig 4B-D). These results confirmed that (i) in  
228 absence of redundant *cis*-regulatory information, LAE is essential for *bab1-2* expression in the  
229 tarsal segments and (ii) the *cis*-information redundant with LAE is located outside the genomic  
230 region covered by *BAC26B15*.

231 To identify limb-specific redundant *cis*-regulatory information within the *bab* complex, we first  
232 tested the capacity of another BAC, *BAC69B22*, which overlaps *bab1* and lacks LAE (see Fig  
233 4A), to restore Bab1 expression in *bab<sup>AR07</sup>* mutant leg discs. As shown in Fig 4E-F, the X-linked  
234 *BAC69B22<sup>ZH2A</sup>* could restore *bab1* expression in ts2-4, indicating that it contains *cis*-regulatory

235 information redundant with LAE activity in these segments. To test the capacity of *BAC69B22*  
236 sequences to also regulate *bab2* expression in *ts2-4*, we placed *BAC69B22<sup>ZH2A</sup>* across  
237 *BAC26B15 $\Delta$ LAE<sup>ZH2A</sup>*, to allow pairing-dependent *trans*-interactions (i.e., transvection) between  
238 the two X chromosomes in females. This configuration partially restored Bab2 expression in  
239 *ts2-4* cells from *bab<sup>AR07</sup>* mutant L3 leg discs, albeit in salt and pepper patterns (Fig 4G),  
240 diagnostic of transvection effects (37).

241 From these data, we predicted the existence of *cis*-regulatory information within the *69B22*  
242 chromosomal interval capable to drive some *bab1-2* expression in distal leg tissues and acting  
243 redundantly with the LAE enhancer.

244

#### 245 **Chromatin features predict limb-specific *cis*-regulatory elements within *bab1***

246 Next, we sought to identify *cis*-regulatory information acting redundantly with LAE by taking  
247 advantage of available genome-wide chromatin features and High-throughput chromosome  
248 conformation Capture (Hi-C) experiments performed from L3 eye-antennal and/or leg discs  
249 (Fig 5). *bab1-2* are indeed co-expressed in distal antennal cells within the composite eye-  
250 antennal imaginal disc (11). A topologically-associating domain covering the entire *bab* locus  
251 was detected in Hi-C data from eye-antennal discs (Fig 5A and S3A Fig) (38), revealing  
252 particularly strong interactions between *bab1-2* promoter regions.

253 We then used published genome-wide data from Chromatin Immuno-Precipitation (ChIP-Seq),  
254 Formaldehyde-Assisted Isolation of Regulatory Elements (FAIRE-Seq) and Assay for  
255 Transposase-Accessible Chromatin (ATAC-Seq) experiments (38-41), looking for active  
256 enhancer marks (H3K4me1 and H3K27Ac) and nucleosome-depleted chromatin regions (thus  
257 accessible to transcription factors). Active enhancer signatures are mainly associated with a  
258 ~15-kb-long genomic region that we termed BER, for “*bab1* Enhancer Region”, encompassing

259 the *bab1* promoter, first exon and part of its first intron (Fig 5B, lanes 1-2 and 5-6, respectively;  
260 see also S3B Fig for peak calling data). Note that LAE is also accessible to transcription factors  
261 and carries H3K4me1 marks, consistently with enhancer activity in distal antennal cells (17).

262 To more precisely locate putative enhancer element(s) within BER, we analyzed previously-  
263 published ChIP-Seq data from L3 leg discs (42) for binding sites for Dll, Sp1 and Hth proteins,  
264 known to regulate *bab1* and/or *bab2* expression in the developing legs (17, 42-44). Strong Dll  
265 binding is detected throughout BER, including over the *bab1* promoter (Fig 5B, lane 10; see  
266 also S3B Fig). In leg discs, Dll binding is detected over 8 out of 10 Open Chromatin Subregions  
267 (OCS) within BER (Fig 6C and S3B Fig) and six of those eight are also bound by Sp1 ZF  
268 protein. Of note, all nucleosome-depleted (i.e., OCS) BER subregions in the leg are also  
269 accessible in the eye-antennal discs (40) (Fig 5B, compare lanes 2 and 9, and Fig 6C, two upper  
270 lanes). Lastly, of six OCS sequences co-bound by Dll and Sp1, four are also bound by Hth  
271 protein (Fig 5B, lane 8, and Fig 6C, bottom lane). FAIRE-Seq data indicate that, in addition to  
272 LAE, only OCS7 is nucleosome-depleted in the leg and eye-antennal discs but not the wing  
273 and/or haltere discs (Fig 5B, lanes 13, 16, 18, and Fig 6C, four upper lines; see also S3B Fig).  
274 Importantly, ventral limb-specific OCS7 is co-bound by Dll, Sp1 and Hth transcription factors  
275 (Fig 6C). Thus, within the entire *bab* locus, only LAE and BER OCS7 are specifically bound  
276 by transcriptional regulators in the developing leg and antenna.

277 In summary, data mining indicates that BER includes a cluster of enhancer elements bound by  
278 Dll and Sp1 in leg discs and thus are good candidates for acting redundantly with LAE in  
279 regulating *bab* genes in a ventral limb-specific manner.

280

281 **BER includes multiple *cis*-regulatory elements active in diverse developmental contexts**

282 To further ascribe regulatory roles to BER subregions, we took advantage of a systematic  
283 analysis of Gal4 reporter lines (45). Out of six lines containing BER fragments (Fig 6B), only  
284 two, *73C11* and *73C05*, overlapping OCS1-3, are active in the leg and eye-antennal discs  
285 (FlyLight database; (<http://flweb.janelia.org/cgi-bin/flew.cgi>; S4B Fig). Nevertheless, none  
286 reproduce the *bab1/2* leg or antennal expression patterns in four or two concentric distal rings,  
287 respectively. These and other published data from reporter constructs including *bab1* first intron  
288 sequences (14) indicate that OCS1-7 (see Fig 6B) are not sufficient to properly drive *bab1/2*  
289 expression in the developing legs and suggest the requirement of additional BER elements,  
290 particularly the *bab1* promoter region (i.e., OCS9). This hypothesis is consistent with binding  
291 of the known *bab1-2* leg regulators Dll and Sp1 throughout BER, in addition to LAE (Fig 5,  
292 lane 10; and S3B Fig).

293 The *73C05* BER fragment also drives reporter gene expression in the wing, haltere and genital  
294 discs (S4 Fig, panels E and H-J) in patterns strikingly similar to those described for *bab2* (11,  
295 44). Consistently, FAIRE- and ChIP-Seq data from haltere discs indicate respectively that  
296 OCS1-3 are nucleosome-free and bind the Ultrabithorax (Ubx) Hox-type homeoprotein known  
297 to activate directly *bab2* expression in haltere tissues (Fig 5B, lanes 16-17, and Fig 6C) (46,  
298 47). Furthermore, ChIP-Seq data from whole L3 larvae (modENCODE), showed binding over  
299 the entire BER region of the Hox Abd-B genital selector (Fig5B, lane 20) (48). Lastly, BER  
300 includes (i) nucleosome-depleted sequences governing expression in adult muscles and bound  
301 by the mesodermal transcription factors Mef2, Slp1 and Tinman in late embryos (14, 49) as  
302 well as (ii) a sequence element (overlapping OCS5) which confers enhancer activity in ovarian  
303 somatic cells (50) (see Fig 6D).

304 Taken together, our data indicate that BER sequences drive *bab1-2* expression in developing  
305 limbs but also in other tissues such as wing, haltere, genitalia and mesoderm. Moreover, owing  
306 to the presence of binding sites for transcription factors known to regulate *bab* gene expression

307 in these respective tissues, spread out over the whole BER sequence, the latter is thus proposed  
308 to act as a pleiotropic enhancer region.

309

### 310 **Cross- and auto-regulations among the *bab* genes**

311 Bab proteins interact with A/T-rich DNA sequences through their BabCD DNA-binding  
312 domain, including binding sites within their own locus (51). We therefore tested whether the  
313 Bab1-2 proteins autoregulate and/or cross-regulate their own expression. Previous data  
314 indicated that Bab2 protein expression is unaffected in *bab1* loss-of-function mutants (11).  
315 Given that protein null *bab2* alleles are not available, we used RNA interference coupled to  
316 flip-out (FO) Gal4 expression to down-regulate clonally *bab2* expression within developing  
317 legs, and examine *LAE-RFP* and *bab1* expression in mosaic L3 leg discs (Fig 7). Strikingly,  
318 both *LAE-RFP* and *bab1* were up-regulated cell-autonomously in most tarsal mitotic clones  
319 (n=17/20) (Fig 7, panels A-A"). Moreover, *bab2* down-regulation in proximal-most RFP+ ts1  
320 cells (expressing only *bab2*) activated cell-autonomously *bab1*, in addition to up-regulating  
321 *LAE-RFP* expression (Fig 7, white arrows in panels B-B"). These results suggested to us that  
322 the *bab2* paralog specifically down-regulates its own expression through partial repression of  
323 LAE enhancer activity. To confirm these observations, we generated mutant clones for the  
324 *bab<sup>AR07</sup>* null allele, lacking both *bab2* and *bab1* activities. A slight cell-autonomous *LAE-GFP*  
325 reporter up-regulation could be observed in all examined *bab<sup>AR07</sup>* clones (detected with anti-  
326 Bab2 antibodies; n>20) (Fig 7, panels C-C"), independently of their size and position within  
327 *bab2*-expressing tarsal cells (see white arrows and arrowheads).

328 Altogether, we conclude that *bab2* down-regulates its own expression, likely via partial  
329 repression of LAE activity, thus ensuring appropriate levels of both paralogous BTB-BabCD  
330 transcription factors in distal leg tissues, and most likely in other appendages as well.

331

332 **The *bab* gene complex arose from *bab1* duplication in the Muscomorpha infraorder**

333 The different levels of *cis*-regulatory element redundancy within the *bab* locus led us to trace  
334 back the evolutionary origin of the *bab* duplication found in *D. melanogaster* (*Dmel*). To start,  
335 we identified proteins orthologous to *Dmel* Bab1 or Bab2, i.e., displaying an N-terminal BTB  
336 associated to a C-terminal BabCD domain (collectively referred to as BTB-BabCD proteins)  
337 (11) within highly diverse dipteran species (see Fig 8A). Two distinct BTB-BabCD proteins  
338 strongly related to *Dmel* Bab1 and Bab2, respectively, were identified in the Muscomorpha  
339 (higher flies, also known as Cyclorrhapha) superfamily, both within the Schizophora (in  
340 Calyptratae, such as *Musca domestica* and *Glossina morsitans*, and in Acalyptratae, particularly  
341 among Drosophilidae) and Aschiza subsections (Fig 8A-B and Supplementary data). In  
342 contrast, a single BTB-BabCD protein could be identified in evolutionarily-distant dipteran  
343 species within (i) the brachyceran Asilomorpha and Stratiomyomorpha superfamilies (such as  
344 *Proctacanthus coquilletti* and *Hermetia illucens*, respectively), collectively referred to as  
345 Orthorrhapha; (ii) the Nematocera suborder families (with rare exceptions, in Psychodomorpha  
346 and Bibionomorpha, see below); (iii) other Insecta orders (e.g., Coleoptera, Hymenoptera and  
347 Lepidoptera), and in crustaceans (e.g., *Daphnia pulex*) (see Supplementary data).

348 To analyze the phylogenetic relationships between these different Bab-related proteins, their  
349 primary sequences were aligned and their degree of structural relatedness examined through a  
350 maximum likelihood analysis. As expected from an ancient duplication, muscomorphan Bab1-  
351 2 paralogs cluster separately, while singleton asilomorphan BTB-BabCD proteins are more  
352 related to muscomorphan Bab1 than Bab2 (Fig 8B and S5 Fig), indicating that muscomorphan  
353 *bab2* originated from *bab1* duplication.

354 Interestingly, contrary to most nematocerans, two or even three *bab1* paralogs are present in  
355 the fungus gnat *Coboldia fuscipes* (Psychodomorpha) and the gall midge *Mayetiola destructor*  
356 (Bibionomorpha), respectively. Significantly, *M. destructor* and *C. fuscipes bab1* paralogs (i)  
357 cluster separately in our phylogenetic analysis (Fig 8B and S5 Fig) and (ii) two are arrayed in  
358 the same chromosomal contexts for both species (S6 Fig), indicating that they have likely been  
359 generated through independent gene duplication processes in the Bibionomorpha and  
360 Psychodomorpha, respectively.

361 Taken together, and updating a previous work (13), our phylogenomics analysis (summarized  
362 in Fig 9B-C) indicates that a single ancestral *bab* gene related to *bab1* has been duplicated to  
363 give rise to *bab2* within the Muscomorpha (Cyclorrhapha) infraorder.

364

### 365 **LAE sequences have been fixed in the Brachycera, thus predating *bab1* duplication**

366 Having traced back the *bab* gene duplication raised the question of the evolutionary origin of  
367 the LAE enhancer, which regulates both *bab1* and *bab2* expression (17) (this work). We have  
368 previously shown that LAE includes three subsequences highly-conserved among twelve  
369 reference Drosophilidae genomes (52), termed CR1-3 (for Conserved Regions 1 to 3; see S7A  
370 Fig and Supplementary data), of which only two, CR1 and 2, are critical for tissue-specificity  
371 (17, 25). The 68 bp CR1 includes contiguous binding sites for Dll and C15 homeoproteins,  
372 while the 41 bp CR2 comprises contiguous binding sites for Dll as well as the ZF protein Bowl  
373 (S7 Fig, panels B and C, respectively) (17, 25).

374 To trace back the LAE evolutionary origin, we then systematically searched for homologous  
375 CR1-3 sequences (>50% identity) in dipteran genomes. Importantly, conserved LAE sequences  
376 have not been yet reported outside drosophilids. Small genomic regions with partial or extensive  
377 homologies to the CR1 (encompassing the C15 and Dll binding sites) and CR2 (particularly the



378 Dll and Bowl binding sites) could be detected in all examined Brachycera families but not in  
379 any nematoceran (Fig 9B and S7B-C Fig). Contrary to closely-associated CR1-2 homologous  
380 sequences, no CR3-related sequence could be identified nearby, in any non-Drosophilidae  
381 species. Significantly, homologous LAE sequences are situated (i) in between the tandemly-  
382 duplicated paralogs in muscomorphan species for which the entire *bab* locus sequence was  
383 available to us, suggesting an evolutionarily-conserved enhancer role, or (ii) 20 kb upstream of  
384 the *bab1*-related singleton in the asilomorphan *P. coquilletti* (see Fig 9C).

385 Taken together, as summarized in Fig 9A-C, these data suggest that a LAE-like enhancer with  
386 CR1- and CR2-related elements emerged early on in the Brachycera suborder, 180-200 million  
387 years ago, and has been since fixed within or upstream the *bab* locus in the Muscomorpha and  
388 Asilomorpha infraorders, respectively.

389

390 **Like LAE elements, *bab1* promoter sequences have been fixed early on in the Brachycera**

391 Given their differential interplay with the long-lasting LAE enhancer, we next analyzed the  
392 evolutionary conservation of *Dmel bab1-2* promoter core sequences (Fig 9B and S8 Fig). Both  
393 *bab* promoters are TATA-less. Whereas *bab1* has a single transcriptional initiator (Inr) element  
394 (TTCAGTC), its *bab2* paralog displays tandemly-duplicated Inr sequences (ATTCAGTTCGT)  
395 (53, 54) (S8 Fig). Both promoters display 64% sequence identity over 28 base pairs, including  
396 Inr (TTCAGT) and downstream putative Pause Button (PB; consensus CGNNCG) sequences  
397 (55) (see S8A Fig). These data suggested that (i) the duplication process having yielded *bab2*  
398 included the ancestral *bab1* promoter and (ii) PolII pausing ability previously shown for *bab2*  
399 promoter (56-58) probably also occurs for *bab1* promoter.

400 Homology searches revealed that *bab1* promoter sequences have been strongly conserved in  
401 the three extant Muscomorpha families and even partially in some asilomorphans (e.g., *P.*

402 *coquellitti*), for which a *bab1*-related singleton gene is present (Fig 9B and S8B Fig). In striking  
403 contrast to *bab1*, sequence conservation of the *bab2* promoter could only be detected among  
404 some Acalypratae drosophilids (Fig 9B and S8C Fig). In agreement with a fast-evolutionary  
405 drift for *bab2* promoter sequences, the duplicated Inr is even only detected in *Drosophila* group  
406 species.

407 Taken together, these evolutionary data (summarized in Fig 9B) indicate that, likewise for the  
408 LAE enhancer, *bab1* promoter sequences have been under strong selective pressure among the  
409 Brachycera, both in the Muscomorpha and Asilomorpha infraorders, while paralogous *bab2*  
410 promoter sequences diverged rapidly among muscomorphans.

411

412 **Unlike LAE, other *bab* CRE sequences have not been conserved beyond the**  
413 **Muscomorpha**

414 The broad LAE sequence conservation led us to also trace back the evolutionary origins of the  
415 pleiotropic BER enhancer region as well as the cardiac CE, abdominal anterior AE and  
416 sexually-dimorphic DE *cis*-regulatory elements (see Fig 9). Sequences homologous to half of  
417 the BER OCS subregions could be detected among the 12 reference Drosophilidae genomes  
418 (52), in Calypratae schizophorans and even in the Muscomorpha Aschiza subsection (e.g.,  
419 OCS3) (S10-18 Fig). Unlike the LAE enhancer, homologous BER sequence elements (except  
420 the *bab1* promoter) could not be detected in non-muscomorphan families. Cardiac CE and  
421 abdominal DE are even less conserved given that related sequences could be only detected  
422 within schizophoran (excepted in Calypratae) (Fig 9B and S9 Fig, panels B and C,  
423 respectively), whereas abdominal AE sequences could be only identified among drosophilids  
424 (Supplementary data) but not in aschizan, asilomorphan and nematoceran *bab* loci.

425 In conclusion, contrary to the LAE enhancer which among the Diptera emerged early on in the  
426 Brachycera suborder, other so-far identified *bab* cis-regulatory sequences have not been  
427 conserved beyond the Muscomorpha infraorder. Thus, as summarized in Fig 9B, and unlike the  
428 long-lasting brachyceran LAE (CR1-2) sequences, these data suggest that other enhancer  
429 sequences have been fixed within the Muscomorpha concomitantly (BER) or even after (CE,  
430 DE and AE) the *bab2* paralog emergence. Moreover, as expected for a pleiotropic enhancer  
431 region, BER sequence conservation allowed us to predict binding sites for transcription factors  
432 known, or so far unsuspected, prone to regulate directly the two *bab* genes in many distinct  
433 developmental contexts, and which are presented hereafter.

434

#### 435 **Predictive TF combinatorial code governing *bab* gene expression in diverse tissues**

436 We gathered our data from TF binding site evolutive conservation (described in Supplementary  
437 data and S10-19 Fig) with ChIP-Seq experiments from the literature (GEO datasets; see  
438 Materials and Methods) (Fig 5B and S3B Fig). Associated with our precise knowledge of *bab*  
439 locus enhancer sequences and with previous genetic data also gained from the literature, our  
440 compilation presented in Fig. 10 allows to propose new models for the TF code involved in  
441 *Dmel bab* locus regulation: (i) It provides new insights into limb-specific *bab1/2* regulation  
442 proposing additional direct regulators such as Sp1 in the legs, Hth in the antenna, Scalloped  
443 (Sd) in the wing and Ubx in the haltere (ChIP-Seq data shown in S3 Fig); (ii) It suggests that  
444 BER also acts as an enhancer region for *bab* gene regulation in other developmental contexts  
445 and that common TF sets (notably Abd-B together with Dsx) are acting through distinct cis-  
446 regulatory elements within BER to drive *bab* gene expression in distinct tissues (e.g., in  
447 abdominal histoblast nests versus genitalia); (iii) It proposes a direct Bab2 binding on LAE for  
448 *bab* gene auto- and cross regulation (tested above); (iv) Finally, analysis of sequences conserved

449 among brachyceran *bab* loci identified predicted binding sites for more broadly-expressed  
450 transcriptional regulators, i.e., GAF, Pho and CTCF (directly interacting with BER OCS; see  
451 Fig 5B, lanes 3, 14 and 19, respectively, as well as S3 Fig for GAF), as well as Eip93F,  
452 Eip74EF, Chinmo, all related to chromatin organization whose putative roles in *bab* locus  
453 regulation are discussed hereafter.

454

## 455 **Discussion**

456 In this work, we have addressed the issue of the emergence and functional diversification of  
457 enhancers and promoters from two tandem gene duplicates. Using the *Drosophila bab* locus as  
458 a model, we showed that the paralogous genes *bab1-2* originate from an ancient *bab1*  
459 duplication in the Muscomorpha/Cyclorrhapha. The early-fixed brachyceran *bab1* LAE has  
460 been co-opted lately to regulate also *bab2* expression. Furthermore, this unique enhancer is also  
461 responsible for paralog-specific *bab2* expression along the P-D leg axis presumably through  
462 privileged interactions with the *bab2* promoter. Finally, LAE regulates only some aspects of  
463 *bab1-2* expression in the developing limbs because redundant information has emerged within  
464 a large pleiotropic enhancer driving *bab1* and/or *bab2* expression in highly-diverse tissues, by  
465 binding common sets of developmental transcription factors. This work brings some cues about  
466 (i) how a single enhancer can drive specificity among tandem gene duplicates, (ii) how  
467 enhancers evolutionary adapt with distinct cognate gene promoters, and (iii) which functional  
468 links can be predicted between dedicated transcription factors and chromatin dynamics during  
469 development.

470

471 **A shared enhancer differentially regulating two tandem gene paralogs through distinct**  
472 **promoter targeting specificities**

473 Here, we have shown that a single enhancer, LAE, regulates two tandem gene paralogs at the  
474 same stage and in the same expression pattern. How can this work? It has been proposed that  
475 enhancers and their cognate promoters are physically associated within phase-separated nuclear  
476 foci composed of high concentrations of TFs and proteins from the basal RNA polymerase II  
477 (PolII) initiation machinery inducing strong transcriptional responses (59, 60). Our Hi-C data  
478 from eye-antennal discs show a strong interaction between *bab1-2* promoter regions (Fig 5),  
479 suggesting that both *bab* promoters could be in close proximity within such phase separated  
480 droplets, thus taking advantage of shared transcriptional regulators and allowing concerted gene  
481 regulation. In contrast, no strong chromosome contacts could be detected between LAE and  
482 any of the two *bab* promoter regions, indicating that this enhancer is not stably associated to  
483 the *bab2* or *bab1* promoter in the eye-antennal disc (where only the antennal distal part  
484 expresses both genes). It would be interesting to gain Hi-C data from leg discs, in which the  
485 *bab1-2* genes are much more broadly expressed.

486 In addition to be required for *bab1-2* co-expression in proximal tarsal segments, we showed  
487 here that the LAE enhancer is also responsible for paralog-specific *bab2* expression along the  
488 proximo-distal leg axis. While it has been proposed that expression pattern modifications occur  
489 through enhancer emergence, our present work indicates that differential expression of two  
490 tandem gene paralogs can depend on a shared pre-existing enhancer (i.e., LAE). How this may  
491 work? Relative to its *bab1* paralog, *bab2* expression extends more proximally within the Dac-  
492 expressing ts1 cells (44) and more distally in the ts5 segment expressing nuclear Bowl protein,  
493 whereas both Dac and Bowl proteins have been proposed to act as *bab2* (and presumably *bab1*)  
494 repressors (25, 33, 61). CRISPR/Cas9-mediated LAE excision allowed us to establish that this  
495 enhancer is critically required for paralog-specific *bab2* leg expression proximally and distally,  
496 in ts1 and ts5 cells, respectively. In this context, we and others have previously proposed that  
497 transiently-expressed Rotund activating TF may antagonize Bowl (and eventually Dac)

498 repressive activity to precisely delimit *bab2* expression among *ts1* cells (17, 61). Given that  
499 *bab1-2* are distinctly expressed despite being both regulated by Bowl and Rotund, we propose  
500 that paralog-specific LAE activity depends on privileged interactions with *bab2* promoter  
501 sequences (discussed below). Thus, we speculate that the *bab2* promoter responds to Rotund  
502 transcriptional activity differently from its *bab1* counterpart. Consistent with this view, ectopic  
503 Rotund expression reveals differential regulatory impacts on the two *bab* gene promoters (S1B  
504 Fig). Genetic together with Hi-C experiments indicate that this could occur through specific  
505 interactions between LAE-bound TFs (e.g., Rotund) and dedicated proteins within the PolII  
506 pre-initiation complex stably-associated to the *bab2* core promoter. We envision that the LAE-  
507 bound ZF protein Rotund, the chromatin-remodeling ZF protein GAF (for GAGA-associated  
508 Factor) and the PolII-associated TFIID subunit TAF3, the latter known to interact physically  
509 with GAF and Bab2 BTB proteins (62, 63), are parts of the underlying promoter targeting  
510 molecular mechanism.

511 In this context, despite that sequence homologies between both promoters (consistent with an  
512 ancient duplication event mobilizing the ancestral *bab1* promoter) are still detectable, it is  
513 significant that the *bab2* promoter evolves much faster than its *bab1* counterpart. While the  
514 *bab1* promoter sequence has been strongly conserved among brachycerans, predating *bab2*  
515 gene emergence in the Muscomorpha, the *bab2* promoter sequence has only been fixed recently  
516 among Drosophilidae, notably through the Initiator (*Inr*) sequence duplication, indicating very  
517 fast evolutionary drift after the gene duplication process which yielded the *bab2* paralog. We  
518 envision that this evolutionary ability has largely contributed to allow novel expression patterns  
519 for *bab2*, presumably through differential enhancer-promoter pairwise interplay.

520

521 **Differential evolutionary conservation of tissue-specific versus pleiotropic enhancers**

522 Our comprehensive phylogenomics analyses from highly diverse Diptera families indicate that  
523 the *bab* gene complex has been generated through tandem duplication from an ancestral *bab1*-  
524 related gene singleton within the Muscomorpha (Cyclorrhapha), about 100-140 years ago. This  
525 result contrasts with published data reporting that the duplication process having yielded the  
526 tandem *bab* genes occurred much earlier in the Diptera lineage leading to both the Brachycera  
527 (true flies; i.e., with short antenna) and Nematocera (long horned “flies”, including mosquitos)  
528 suborders (13). In fact, tandem duplication events implicating the *bab* locus did occur in the  
529 Bibionomorpha, as reported (13)), and even in the Psychodomorpha with three *bab1*-related  
530 gene copies (Figure 8 and S6 Fig), but our phylogenetic analysis supports independent events.  
531 Thus, within the Diptera, the ancestral *bab1* singleton had a high propensity to duplicate locally.  
532 In this study, we have shown a strong evolutionary conservation of LAE subsequences among  
533 brachycerans, notably its CR2 element containing Dll and Bowl binding sites (S7C Fig). This  
534 conservation suggests a long-lasting enhancer function in distal limb-specific regulation of  
535 ancestral singleton *bab1* genes. In striking contrast, BER sequence conservation could only be  
536 detected among extant muscomorphan *bab* loci. We assume that during evolution large  
537 pleiotropic enhancers may better assimilate binding sites for gene-specific transcription factors,  
538 thus generating regulatory novelties in distinct imaginal discs.  
539 Gene duplication is a major source to generate phenotypic innovations during evolution,  
540 through diverging expression and molecular functions, and eventually from single gene copy  
541 translocation to another chromosomal site. Emergence of tissue-specific enhancers not shared  
542 between the two gene duplicates, as well as of “shadow” enhancers, have been proposed to be  
543 evolutionary novelty sources (64) (6). Our work indicates that the presumably long-lasting  
544 brachyceran LAE enhancer has recently been co-opted in drosophilids to allow differential *bab*  
545 gene expression. Conversely, the large BER region has apparently accumulated regulatory

546 sequence elements bound by diverse tissue-specific transcription factors (e.g., Dll, Hth, Abd-B  
547 and Dsx) acting in different cellular contexts.

548

#### 549 **A pleiotropic enhancer region overlapping with a PcG-response element**

550 ChIP-Seq analysis for histone H3 modifications (H3K4me3, H3K27Ac and H3K4me1  
551 enhancer/promoter marks; H3K27me3 chromatin repressive mark) from eye-antennal discs has  
552 revealed the pleiotropic BER enhancer region but also an overlapping repressive PcG  
553 (Polycomb Group family) domain, indicating that BER encompasses a bivalent chromatin  
554 domain, while another one is detected over the *bab2* promoter region. A dual enhancer/silencing  
555 function for PcG-Response Element (PRE) during embryogenesis has recently been established  
556 genome-wide (65), and the authors have proposed that reuse of enhancer regulatory elements  
557 by PcG proteins may help fine-tune gene expression and ensure the timely maintenance of cell  
558 identities throughout development. More recently, we have shown widespread enhancer-PcG  
559 domain interplay during developmental gene activation through chromatin looping in eye-  
560 antennal discs (38). Altogether these data suggest that the *bab1-2* genes might be poised for  
561 activation throughout the eye-antennal disc, and possibly other imaginal discs as well.

562 The Pleiohomeotic (Pho) protein is a DNA-binding PcG complex recruiter, critical for gene  
563 silencing maintenance during development (66). Pho interaction with several BER subregions,  
564 as detected in ChIP-Seq experiments from L3 tissues, as well as the presence of many  
565 evolutionarily-conserved predicted Pho binding sites, support a role for Pho in PcG repression  
566 throughout BER. We thus propose that Pho-containing PcG repressive complex bound at PREs  
567 within the *bab* bivalent locus is counteracted by one or several tissue-specific transcriptional  
568 activators identified in this work, which remain(s) to be characterized.



569 In this context, it is significant that in the eye-antennal disc, the ZF protein CTCF, acting  
570 redundantly with other chromatin insulator proteins, strongly interacts directly with the two  
571 flanking regions of the TAD covering the *bab* locus and also with several BER OCSs (Fig 5B).  
572 Significantly, two of these predicted CTCF interacting sites overlap with putative optimal  
573 binding sites for the PcG-recruiter Pho (S18-19 Fig). These data suggest that the CTCF  
574 architectural protein and the PcG-recruiter Pho may functionally interact to regulate the *bab*  
575 locus chromosome topology. Interestingly, the human Pho homolog (YY1) is a structural  
576 enhancer-promoter looping regulator (67) and orchestrates, together with the CTCF protein, a  
577 3D chromatin looping switch during early neural lineage commitment (68). To our knowledge,  
578 functional relationships between CTCF and Pho proteins have not been investigated genome-  
579 wide in *Drosophila*.

580

### 581 **Dynamic *bric-a-brac* locus chromatin accessibility during development**

582 Recent data indicate that chromatin accessibility is dynamic during *Drosophila* larval  
583 development, being triggered by the ecdysone hormone (69). Dynamic enhancer activity and  
584 chromatin accessibility have been proposed to be regulated by the ecdysone-induced Eip93F  
585 (Ecdysone-induced protein 93F, also called E93) transcriptional regulator (70). ChIP data from  
586 early pupal wings indicate that Eip93F binds many BER OCS as well as the *bab1* promoter  
587 region (70). Consistently, many putative Eip93F binding sites are present in these BER  
588 subregions and several have been conserved beyond Drosophilidae (Fig 10C). Interestingly, the  
589 human Eip93F homolog interacts with CtBP through a conserved motif (71), and *Drosophila*  
590 CtBP is known to recruit diverse chromatin-modifying complexes, notably to participate in  
591 Pho-mediated PcG recruitment to PREs (72). Thus, Eip93F binding to BER *cis*-regulatory  
592 elements may impact the proposed dual PcG activity at the *bab* locus. In addition to Eip93F,

593 BER regulatory sequences include many evolutionarily-conserved putative binding sites for the  
594 Eip74EF protein (Fig 10C), another ecdysone-induced TF, including one which overlaps with  
595 a conserved putative Pho binding site, suggesting again functional correlation between  
596 Ecdysone regulation and PcG activity.

597 Lastly, the *cis*-regulatory landscape within the *bab* locus (i.e., AE, DE, CE, LAE and BER)  
598 includes one or several evolutionarily-conserved predicted binding sites for the Chinmo BTB-  
599 ZF protein participating to developmental timing, notably through interplay with ecdysone  
600 signaling (73, 74). Consistently, ChIP-Seq experiments from embryos (ModENCODE data;  
601 <http://www.modencode.org/>) indicate Chinmo binding to BER sequences (75). Intriguingly, the  
602 Chinmo ZF protein is an additional BTB-containing TF prone to regulate directly the *bab* genes,  
603 possibly through molecular partnerships with the chromatin organizer GAF (another BTB-ZF  
604 protein interacting directly with both *bab* promoter regions; Fig 5B and S3 Fig) and the twin  
605 Bab BTB-BabCD proteins themselves. Thus, Chinmo implication in chromatin organization  
606 and enhancer activity within the *bab* locus undoubtedly deserves to be investigated.

607 In summary, the *bab* locus offers a good paradigm to investigate molecularly in great details  
608 how chromatin structure, particularly higher-order chromosome organization, impacts on  
609 transcriptional memory during development and selective enhancer-promoter interplay in  
610 diverse tissular contexts. Indeed, our comprehensive predictive combinatorial code for tissue-  
611 specific, as well as broadly-expressed architectural transcription factors (e.g., CTCF, Pho and  
612 GAF) regulating two tandem gene paralogs, offers the opportunity to dissect underlying  
613 molecular mechanisms, which are prone to be conserved during animal evolution and thus to  
614 be of broad biological significance.

615

616 **Material and Methods**

## 617 Fly stocks, culture and genetic manipulations

618 *D. melanogaster* stocks were grown on standard yeast extract-sucrose medium. The *vasa-*  
619 *PhiC31 ZH2A attP* stock (kindly provided by F. Karch) was used to generate the *LAEpHsp70-*  
620 *GFP* reporter lines and the *BAC69B22* construct as previously described (17). *LAE-GFP* and  
621 *LAE-RFP* constructs (including both *Hsp70* and *bab2* core promoters) inserted on the ZH2A  
622 (X chromosome) or ZH86Fb (third chromosome) *attP* landing platforms, and displaying  
623 identical expression patterns, have been previously described (17, 25). *C15<sup>2</sup>/TM6B*, *Tb<sup>1</sup>* stock  
624 was kindly obtained from G. Campbell. Mutant mitotic clones for null alleles of *bowl* and  
625 *rotund* were generated with the following genotypes: *y w LAE-GFP; DllGal4<sup>EM2012</sup>, UAS-*  
626 *Flp/+; FRT82B, Ub-RFP/FRT82B rn<sup>12</sup>* (i.e., *rn* mutant clones are RFP negative; Fig 1E) and *y*  
627 *w LAE-RFP; DllGal4<sup>EM2012</sup>, UAS-Flp/+; Ub-GFP, FRT40A/bowl<sup>1</sup> FRT40A* (i.e., *bowl* mutant  
628 clones are GFP negative; Fig 1F), respectively. Rotund protein gain-of-function within the *Dll-*  
629 expressing domain was obtained with the following genotype: *y w LAE-GFP; DllGal4<sup>EM2012</sup>;*  
630 *UAS-Rn<sup>1</sup>/+*. The *Dll<sup>EM212</sup>-Gal4* line was provided by M. Suzanne, while the *UAS-Rn<sup>1</sup>* line was  
631 obtained from the Bloomington stock center. “Flip-out” (FO) mitotic clones over-expressing  
632 dsRNA against *lines* were generated by 40 mn heat shocks at 38°C, in mid-late L2 to early-mid  
633 L3 larvae of genotypes: *y w LAE-RFP hsFlp; UAS-dsRNAlines/pAct>y+>Gal4, UAS-GFP* (i.e.,  
634 FO clones express GFP in S1C Fig). Mutant mitotic clones for the null *bab<sup>AR07</sup>* allele were  
635 generated by 30 mn heat shocks at 38°C, in early first to late second-instar larvae of genotypes:  
636 *y w LAE-GFP, hsFlp; FRT80B/bab<sup>AR07</sup>, FRT80B*. FO mitotic clones over-expressing dsRNA  
637 against *bab1* or *bab2* were generated by 40 mn heat shocks at 38°C, in early to early-mid L3  
638 larvae of genotypes: *y w LAE-RFP hsFlp; UAS-dsbab2 /Pact>y+>Gal4, UAS-GFP* and *y w*  
639 *LAE-RFP, hsFlp; Pact>y+>Gal4, UAS-GFP/+; UAS-dsbab1/+* (i.e., FO clones express GFP  
640 in Fig 7). *UAS-dsRNA* stocks used to obtain interfering RNA against *lines* (#40939), *bab1*  
641 (#35707) and *bab2* (#37260) were obtained from the Bloomington stock Center.

642

### 643 **Immuno-histochemistry and microscopy**

644 Leg discs were dissected from wandering (late third instar stage) larvae (L3). Indirect immuno-  
645 fluorescence was carried out as previously described (17) using a LEICA TCS SP5 or SPE  
646 confocal microscope. Rat anti-Bab2 (11), rabbit anti-Bab1 (14), rabbit anti-Dll (76), rabbit anti-  
647 Bowl (61), and rabbit anti-C15 (31) antibodies were used at 1/2000, 1/500, 1/200, 1/1000 and  
648 1/200, respectively.

649

### 650 **CRISPR/Cas9-mediated chromosomal deletion**

651 Guide RNAs (gRNAs) were designed with CHOPCHOP at the Harvard University website  
652 (<https://chopchop.cbu.uib.no/>). Four gRNA couples were selected that cover two distinct  
653 upstream and downstream LAE positions: TCGGTGGAGCCTTCTTCGCCAGG or  
654 TGGAGCCTTCTTCGCCAGGCCGG; and TATACTGTTGAGATCCCATGCGG or  
655 TTAGGCGCACATAAGGAGGCAGG (the PAM protospacer adjacent motif sequences are  
656 underlined), respectively. Targeting tandem chimeric RNAs were produced from annealed  
657 oligonucleotides inserted into the pCFD4 plasmid, as described in  
658 (<http://www.crisprflydesign.org/>). Each pCFD4-LAE-KO construct was injected into 50 *Vasa*-  
659 *Cas9* embryos (of note the *vasa* promoter sequence is weakly expressed in somatic cells). F0  
660 fertile adults and their F1 progeny, with possible somatic LAE-deletion events and candidate  
661 mutant chromosomes (balanced with *TM6B*, *Tb*), respectively, were tested by polymerase chain  
662 reactions (PCR) with the following oligonucleotides: AGTTTTTCATCCCCCTTCCA and  
663 GTATTTCTTTGCCTTGCCATCG (predicted wild-type amplified DNA: 2167 base pairs).

664

## 665 **Quantitative RT-PCR analysis**

666 T1-3 leg imaginal discs were dissected from homozygous *white*<sup>1118</sup> and *bab*<sup>ALAE-M1</sup> late L3  
667 larvae in PBS 0.1% Tween. 50 discs of each genotype were collected and frozen in nitrogen.  
668 Total messenger RNAs were purified using RNeasy kit (Qiagen) and reverse transcribed by  
669 SuperScript II (ThermoFisher). *bab1*, *bab2* or *rp49* cDNA levels were monitored by  
670 quantitative PCR using the following oligonucleotides: Bab1Fw:  
671 CGCCCAAGAGTAACAGAAGC; Bab1Rev: TCTCCTTGTCCTCGTCCTTG; Bab2Fw:  
672 CTGCAGGATCCAAGTGAGGT; Bab2Rev: GACTTCACCAGCTCCGTTTC; RP49Fw:  
673 GACGCTTCAAGGGACAGTATCTG; RP49Rev: AAACGCGGTTCTGCATGAG. A  
674 Wilcoxon test was performed to evaluate the difference between samples.

675

## 676 **Homology searches, sequence alignments and phylogenetic analyses**

677 Homology searches were done at the NCBI Blast site (<https://blast.ncbi.nlm.nih.gov/Blast.cgi>).  
678 Protein or nucleotide sequence alignments were done using MAFFT (Multiple Alignment using  
679 Fast Fourier Transform) (<https://mafft.cbrc.jp/alignment/server/>). Phylogenetic relationships  
680 were inferred through a maximum likelihood analysis with W-IQ-Tree  
681 (<http://iqtree.cibiv.univie.ac.at/>) and visualized with the ETE toolkit  
682 (<http://etetoolkit.org/treeview/>).

683

## 684 **Transcription factor binding prediction**

685 DNA binding predictions were done using the motif-based sequence analysis tool TomTom  
686 from the MEME suite (<http://meme-suite.org/tools/tomtom>) and the Fly Factor Survey database  
687 (<http://mccb.umassmed.edu/ffs/>).

688

### 689 **Gene expression omnibus datasets**

690 The following gene expression omnibus (GEO) datasets were extracted from the NCBI website  
691 (<https://www.ncbi.nlm.nih.gov/gds/>): GSE59078; GSM1261348; GSM1426265; GSE126985;  
692 GSM3139658; GSM948715; GSE113574; GSM948718; GSM948717; GSE38594;  
693 GSM948720; GSM948716; GSM659162; GSM948719; GSE102339; GSE50363.

694

### 695 **Hi-C and histone tail mark analyses from L3 eye-antennal imaginal discs**

696 Hi-C and histone mark ChIP-Seq analyses from L3 eye-antennal discs have been recently  
697 published in (38).

698

### 699 **Acknowledgments**

700 We thank F. Karch, M. Suzanne, T.M. Williams, G. Boekhoff-Falk, S. Bray, G. Campbell, T.  
701 Kojima, F. Laski, J.L. Couderc and the Bloomington Stock Center for fly stocks and reagents.  
702 We are grateful to Alain Vincent for his proofreading of the manuscript. We thank Julien Favier  
703 for technical assistance, particularly in managing the transgenic facility. Lastly, we  
704 acknowledge Brice Ronsin and the Toulouse RIO Imaging platform.

705

706

## 707 **References**

- 708 1. Ohno S. **Evolution by Gene Duplication**. Springer-Verlag; 1970.
- 709 2. Zhang J. Evolution by gene duplication - an update. *Trends Ecol. Evol.*; 2003. p. 292-8.
- 710 3. Lundin LG. Gene duplications in early metazoan evolution. *Semin Cell Dev Biol.* 1999;10(5):523-  
711 30.
- 712 4. He X, Zhang J. Rapid subfunctionalization accompanied by prolonged and substantial  
713 neofunctionalization in duplicate gene evolution. *Genetics.* 2005;169(2):1157-64.
- 714 5. Sundström G, Larsson TA, Larhammar D. Phylogenetic and chromosomal analyses of multiple  
715 gene families syntenic with vertebrate Hox clusters. *BMC Evol Biol.* 2008;8:254.
- 716 6. Long HK, Prescott SL, Wysocka J. Ever-Changing Landscapes: Transcriptional Enhancers in  
717 Development and Evolution. *Cell.* 2016;167(5):1170-87.
- 718 7. Rubinstein M, de Souza FS. Evolution of transcriptional enhancers and animal diversity. *Philos*  
719 *Trans R Soc Lond B Biol Sci.* 2013;368(1632):20130017.
- 720 8. Carroll SB. Evo-devo and an expanding evolutionary synthesis: a genetic theory of  
721 morphological evolution. *Cell.* 2008;134(1):25-36.
- 722 9. Levine M. Transcriptional enhancers in animal development and evolution. *Curr Biol.*  
723 2010;20(17):R754-63.
- 724 10. Vlad D, Kierzkowski D, Rast MI, Vuolo F, Dello Iorio R, Galinha C, et al. Leaf shape evolution  
725 through duplication, regulatory diversification, and loss of a homeobox gene. *Science.*  
726 2014;343(6172):780-3.
- 727 11. Couderc JL, Godt D, Zollman S, Chen J, Li M, Tiong S, et al. The bric à brac locus consists of two  
728 paralogous genes encoding BTB/POZ domain proteins and acts as a homeotic and morphogenetic  
729 regulator of imaginal development in *Drosophila*. *Development.* 2002;129(10):2419-33.
- 730 12. Salomone JR, Rogers WA, Rebeiz M, Williams TM. The evolution of Bab paralog expression and  
731 abdominal pigmentation among *Sophophora* fruit fly species. *Evol Dev.* 2013;15(6):442-57.

- 732 13. Roeske MJ, Camino EM, Grover S, Rebeiz M, Williams TM. Cis-regulatory evolution integrated  
733 the Bric-à-brac transcription factors into a novel fruit fly gene regulatory network. *Elife*. 2018;7.
- 734 14. Williams TM, Selegue JE, Werner T, Gompel N, Kopp A, Carroll SB. The regulation and evolution  
735 of a genetic switch controlling sexually dimorphic traits in *Drosophila*. *Cell*. 2008;134(4):610-23.
- 736 15. Gompel N, Carroll SB. Genetic mechanisms and constraints governing the evolution of  
737 correlated traits in drosophilid flies. *Nature*. 2003;424(6951):931-5.
- 738 16. Kopp A, Duncan I, Carroll SB. Genetic control and evolution of sexually dimorphic characters in  
739 *Drosophila*. *Nature*. 2000;408(6812):553-9.
- 740 17. Baanannou A, Mojica-Vazquez LH, Darras G, Couderc JL, Cribbs DL, Boube M, et al. *Drosophila*  
741 *distal-less* and *Rotund* bind a single enhancer ensuring reliable and robust *bric-a-brac2* expression in  
742 distinct limb morphogenetic fields. *PLoS Genet*. 2013;9(6):e1003581.
- 743 18. Godt D, Couderc JL, Cramton SE, Laski FA. Pattern formation in the limbs of *Drosophila*: *bric a*  
744 *brac* is expressed in both a gradient and a wave-like pattern and is required for specification and proper  
745 segmentation of the tarsus. *Development*. 1993;119(3):799-812.
- 746 19. Godt D, Laski FA. Mechanisms of cell rearrangement and cell recruitment in *Drosophila* ovary  
747 morphogenesis and the requirement of *bric à brac*. *Development*. 1995;121(1):173-87.
- 748 20. Sahut-Barnola I, Godt D, Laski FA, Couderc JL. *Drosophila* ovary morphogenesis: analysis of  
749 terminal filament formation and identification of a gene required for this process. *Dev Biol*.  
750 1995;170(1):127-35.
- 751 21. Junion G, Bataillé L, Jagla T, Da Ponte JP, Tapin R, Jagla K. Genome-wide view of cell fate  
752 specification: *ladybird* acts at multiple levels during diversification of muscle and heart precursors.  
753 *Genes Dev*. 2007;21(23):3163-80.
- 754 22. Camara N, Whitworth C, Dove A, Van Doren M. Doublesex controls specification and  
755 maintenance of the gonad stem cell niches in. *Development*. 2019;146(11).
- 756 23. Duan J, Zhao Y, Li H, Habernig L, Gordon MD, Miao X, et al. *Bab2* Functions as an Ecdysone-  
757 Responsive Transcriptional Repressor during *Drosophila* Development. *Cell Rep*. 2020;32(4):107972.



- 758 24. Zhao Y, Duan J, Dziegiech A, Büttner S, Engström Y. Bab2 activates JNK signaling to  
759 reprogram *Drosophila* wing disc development. 2021.
- 760 25. Mojica-Vázquez LH, Benetah MH, Baanannou A, Bernat-Fabre S, Deplancke B, Cribbs DL, et al.  
761 Tissue-specific enhancer repression through molecular integration of cell signaling inputs. *PLoS Genet.*  
762 2017;13(4):e1006718.
- 763 26. Kojima T. The mechanism of *Drosophila* leg development along the proximodistal axis. *Dev*  
764 *Growth Differ.* 2004;46(2):115-29.
- 765 27. Kojima T. Developmental mechanism of the tarsus in insect legs. *Curr Opin Insect Sci.*  
766 2017;19:36-42.
- 767 28. Estella C, Voutev R, Mann RS. A dynamic network of morphogens and transcription factors  
768 patterns the fly leg. *Curr Top Dev Biol.* 2012;98:173-98.
- 769 29. Li Q, Barish S, Okuwa S, Maciejewski A, Brandt AT, Reinhold D, et al. A Functionally Conserved  
770 Gene Regulatory Network Module Governing Olfactory Neuron Diversity. *PLoS Genet.*  
771 2016;12(1):e1005780.
- 772 30. Campbell G. Regulation of gene expression in the distal region of the *Drosophila* leg by the  
773 Hox11 homolog, C15. *Dev Biol.* 2005;278(2):607-18.
- 774 31. Kojima T, Tsuji T, Saigo K. A concerted action of a paired-type homeobox gene, *aristaless*, and  
775 a homolog of Hox11/*tlx* homeobox gene, *clawless*, is essential for the distal tip development of the  
776 *Drosophila* leg. *Dev Biol.* 2005;279(2):434-45.
- 777 32. Natori K, Tajiri R, Furukawa S, Kojima T. Progressive tarsal patterning in the *Drosophila* by  
778 temporally dynamic regulation of transcription factor genes. *Dev Biol.* 2012;361(2):450-62.
- 779 33. Greenberg L, Hatini V. Essential roles for lines in mediating leg and antennal proximodistal  
780 patterning and generating a stable Notch signaling interface at segment borders. *Dev Biol.*  
781 2009;330(1):93-104.
- 782 34. Prud'homme B, Gompel N, Carroll SB. Emerging principles of regulatory evolution. *Proc Natl*  
783 *Acad Sci U S A.* 2007;104 Suppl 1:8605-12.

- 784 35. Hittinger CT, Carroll SB. Gene duplication and the adaptive evolution of a classic genetic switch.  
785 Nature. 2007;449(7163):677-81.
- 786 36. Carroll SB. From pattern to gene, from gene to pattern. Int J Dev Biol. 1998;42(3 Spec No):305-  
787 9.
- 788 37. Lim B, Heist T, Levine M, Fukaya T. Visualization of Transvection in Living Drosophila Embryos.  
789 Mol Cell. 2018;70(2):287-96.e6.
- 790 38. Loubiere V, Papadopoulos GL, Szabo Q, Martinez AM, Cavalli G. Widespread activation of  
791 developmental gene expression characterized by PRC1-dependent chromatin looping. Sci Adv.  
792 2020;6(2):eaax4001.
- 793 39. Yeung K, Wang F, Li Y, Wang K, Mardon G, Chen R. Integrative genomic analysis reveals novel  
794 regulatory mechanisms of eyeless during Drosophila eye development. Nucleic Acids Res.  
795 2018;46(22):11743-58.
- 796 40. McKay DJ, Lieb JD. A common set of DNA regulatory elements shapes Drosophila appendages.  
797 Dev Cell. 2013;27(3):306-18.
- 798 41. Davie K, Jacobs J, Atkins M, Potier D, Christiaens V, Halder G, et al. Discovery of transcription  
799 factors and regulatory regions driving in vivo tumor development by ATAC-seq and FAIRE-seq open  
800 chromatin profiling. PLoS Genet. 2015;11(2):e1004994.
- 801 42. Newcomb S, Voutev R, Jory A, Delker RK, Slattery M, Mann RS. cis-regulatory architecture of a  
802 short-range EGFR organizing center in the Drosophila melanogaster leg. PLoS Genet.  
803 2018;14(8):e1007568.
- 804 43. Córdoba S, Requena D, Jory A, Saiz A, Estella C. The evolutionarily conserved transcription  
805 factor Sp1 controls appendage growth through Notch signaling. Development. 2016;143(19):3623-31.
- 806 44. Chu J, Dong PD, Panganiban G. Limb type-specific regulation of bric a brac contributes to  
807 morphological diversity. Development. 2002;129(3):695-704.
- 808 45. Jenett A, Rubin GM, Ngo TT, Shepherd D, Murphy C, Dionne H, et al. A GAL4-driver line resource  
809 for Drosophila neurobiology. Cell Rep. 2012;2(4):991-1001.

- 810 46. Slattery M, Ma L, Négre N, White KP, Mann RS. Genome-wide tissue-specific occupancy of the  
811 Hox protein Ultrabithorax and Hox cofactor Homothorax in *Drosophila*. *PLoS One*. 2011;6(4):e14686.
- 812 47. Boube M, Hudry B, Immarigeon C, Carrier Y, Bernat-Fabre S, Merabet S, et al. *Drosophila*  
813 *melanogaster* Hox Transcription Factors Access the RNA Polymerase II Machinery through Direct  
814 Homeodomain Binding to a Conserved Motif of Mediator Subunit Med19. *PLoS Genet*.  
815 2014;10(5):e1004303.
- 816 48. Estrada B, Sanchez-Herrero E. The Hox gene Abdominal-B antagonizes appendage  
817 development in the genital disc of *Drosophila*. *Development*. 2001;128(3):331-9.
- 818 49. Zinzen RP, Girardot C, Gagneur J, Braun M, Furlong EE. Combinatorial binding predicts spatio-  
819 temporal cis-regulatory activity. *Nature*. 2009;462(7269):65-70.
- 820 50. Arnold CD, Gerlach D, Stelzer C, Boryń Ł, Rath M, Stark A. Genome-wide quantitative enhancer  
821 activity maps identified by STARR-seq. *Science*. 2013;339(6123):1074-7.
- 822 51. Lours C, Bardot O, Godt D, Laski FA, Couderc JL. The *Drosophila melanogaster* BTB proteins bric  
823 a brac bind DNA through a composite DNA binding domain containing a pipsqueak and an AT-Hook  
824 motif. *Nucleic Acids Res*. 2003;31(18):5389-98.
- 825 52. Clark AG, Eisen MB, Smith DR, Bergman CM, Oliver B, Markow TA, et al. Evolution of genes and  
826 genomes on the *Drosophila* phylogeny. *Nature*. 2007;450(7167):203-18.
- 827 53. Ohler U, Liao GC, Niemann H, Rubin GM. Computational analysis of core promoters in the  
828 *Drosophila* genome. *Genome Biol*. 2002;3(12):RESEARCH0087.
- 829 54. Meers MP, Adelman K, Duronio RJ, Strahl BD, McKay DJ, Matera AG. Transcription start site  
830 profiling uncovers divergent transcription and enhancer-associated RNAs in *Drosophila melanogaster*.  
831 *BMC Genomics*. 2018;19(1):157.
- 832 55. Gilchrist DA, Dos Santos G, Fargo DC, Xie B, Gao Y, Li L, et al. Pausing of RNA polymerase II  
833 disrupts DNA-specified nucleosome organization to enable precise gene regulation. *Cell*.  
834 2010;143(4):540-51.

- 835 56. Muse GW, Gilchrist DA, Nechaev S, Shah R, Parker JS, Grissom SF, et al. RNA polymerase is  
836 poised for activation across the genome. *Nat Genet.* 2007;39(12):1507-11. Epub 2007 Nov 11.
- 837 57. Lee C, Li X, Hechmer A, Eisen M, Biggin MD, Venters BJ, et al. NELF and GAGA factor are linked  
838 to promoter-proximal pausing at many genes in *Drosophila*. *Mol Cell Biol.* 2008;28(10):3290-300.
- 839 58. Kwak H, Fuda NJ, Core LJ, Lis JT. Precise maps of RNA polymerase reveal how promoters direct  
840 initiation and pausing. *Science.* 2013;339(6122):950-3.
- 841 59. Kim S, Shendure J. Mechanisms of Interplay between Transcription Factors and the 3D  
842 Genome. *Mol Cell.* 2019;76(2):306-19.
- 843 60. Sabari BR, Dall'Agnese A, Young RA. Biomolecular Condensates in the Nucleus. *Trends Biochem*  
844 *Sci.* 2020.
- 845 61. de Celis Ibeas JM, Bray SJ. Bowl is required downstream of Notch for elaboration of distal limb  
846 patterning. *Development.* 2003;130(24):5943-52.
- 847 62. Pointud JC, Larsson J, Dastugue B, Couderc JL. The BTB/POZ domain of the regulatory proteins  
848 Bric à brac 1 (BAB1) and Bric à brac 2 (BAB2) interacts with the novel *Drosophila* TAF(II) factor  
849 BIP2/dTAF(II)155. *Dev Biol.* 2001;237(2):368-80.
- 850 63. Chopra VS, Srinivasan A, Kumar RP, Mishra K, Basquin D, Docquier M, et al. Transcriptional  
851 activation by GAGA factor is through its direct interaction with dmTAF3. *Dev Biol.* 2008;317(2):660-70.
- 852 64. Hong JW, Hendrix DA, Levine MS. Shadow enhancers as a source of evolutionary novelty.  
853 *Science.* 2008;321(5894):1314.
- 854 65. Erceg J, Pakozdi T, Marco-Ferreres R, Ghavi-Helm Y, Girardot C, Bracken AP, et al. Dual  
855 functionality of. *Genes Dev.* 2017;31(6):590-602.
- 856 66. Schuettengruber B, Bourbon HM, Di Croce L, Cavalli G. Genome Regulation by Polycomb and  
857 Trithorax: 70 Years and Counting. *Cell.* 2017;171(1):34-57.
- 858 67. Weintraub AS, Li CH, Zamudio AV, Sigova AA, Hannett NM, Day DS, et al. YY1 Is a Structural  
859 Regulator of Enhancer-Promoter Loops. *Cell.* 2017;171(7):1573-88.e28.

- 860 68. Beagan JA, Duong MT, Titus KR, Zhou L, Cao Z, Ma J, et al. YY1 and CTCF orchestrate a 3D  
861 chromatin looping switch during early neural lineage commitment. *Genome Res.* 2017;27(7):1139-52.
- 862 69. Uyehara CM, Nystrom SL, Niederhuber MJ, Leatham-Jensen M, Ma Y, Buttitta LA, et al.  
863 Hormone-dependent control of developmental timing through regulation of chromatin accessibility.  
864 *Genes Dev.* 2017;31(9):862-75.
- 865 70. Nystrom SL, Niederhuber MJ, McKay DJ. Expression of E93 provides an instructive cue to  
866 control dynamic enhancer activity and chromatin accessibility during development. *Development.*  
867 2020;147(6).
- 868 71. Quinlan KG, Verger A, Kwok A, Lee SH, Perdomo J, Nardini M, et al. Role of the C-terminal  
869 binding protein PXDLS motif binding cleft in protein interactions and transcriptional repression. *Mol*  
870 *Cell Biol.* 2006;26(21):8202-13.
- 871 72. Basu A, Atchison ML. CtBP levels control intergenic transcripts, PHO/YY1 DNA binding, and PcG  
872 recruitment to DNA. *J Cell Biochem.* 2010;110(1):62-9.
- 873 73. Marchetti G, Tavosanis G. Steroid Hormone Ecdysone Signaling Specifies Mushroom Body  
874 Neuron Sequential Fate via Chinmo. *Curr Biol.* 2017;27(19):3017-24.e4.
- 875 74. Narbonne-Reveau K, Maurange C. Developmental regulation of regenerative potential in  
876 *Drosophila* by ecdysone through a bistable loop of ZBTB transcription factors. *PLoS Biol.*  
877 2019;17(2):e3000149.
- 878 75. Nègre N, Brown CD, Ma L, Bristow CA, Miller SW, Wagner U, et al. A cis-regulatory map of the  
879 *Drosophila* genome. *Nature.* 2011;471(7339):527-31.
- 880 76. Panganiban G, Sebring A, Nagy L, Carroll S. The development of crustacean limbs and the  
881 evolution of arthropods. *Science.* 1995;270(5240):1363-6.
- 882 77. Jory A, Estella C, Giorgianni MW, Slattery M, Laverty TR, Rubin GM, et al. A survey of 6,300  
883 genomic fragments for cis-regulatory activity in the imaginal discs of *Drosophila melanogaster*. *Cell*  
884 *Rep.* 2012;2(4):1014-24.

885 78. Slattery M, Voutev R, Ma L, Nègre N, White KP, Mann RS. Divergent transcriptional regulatory  
886 logic at the intersection of tissue growth and developmental patterning. PLoS Genet.  
887 2013;9(9):e1003753.

888

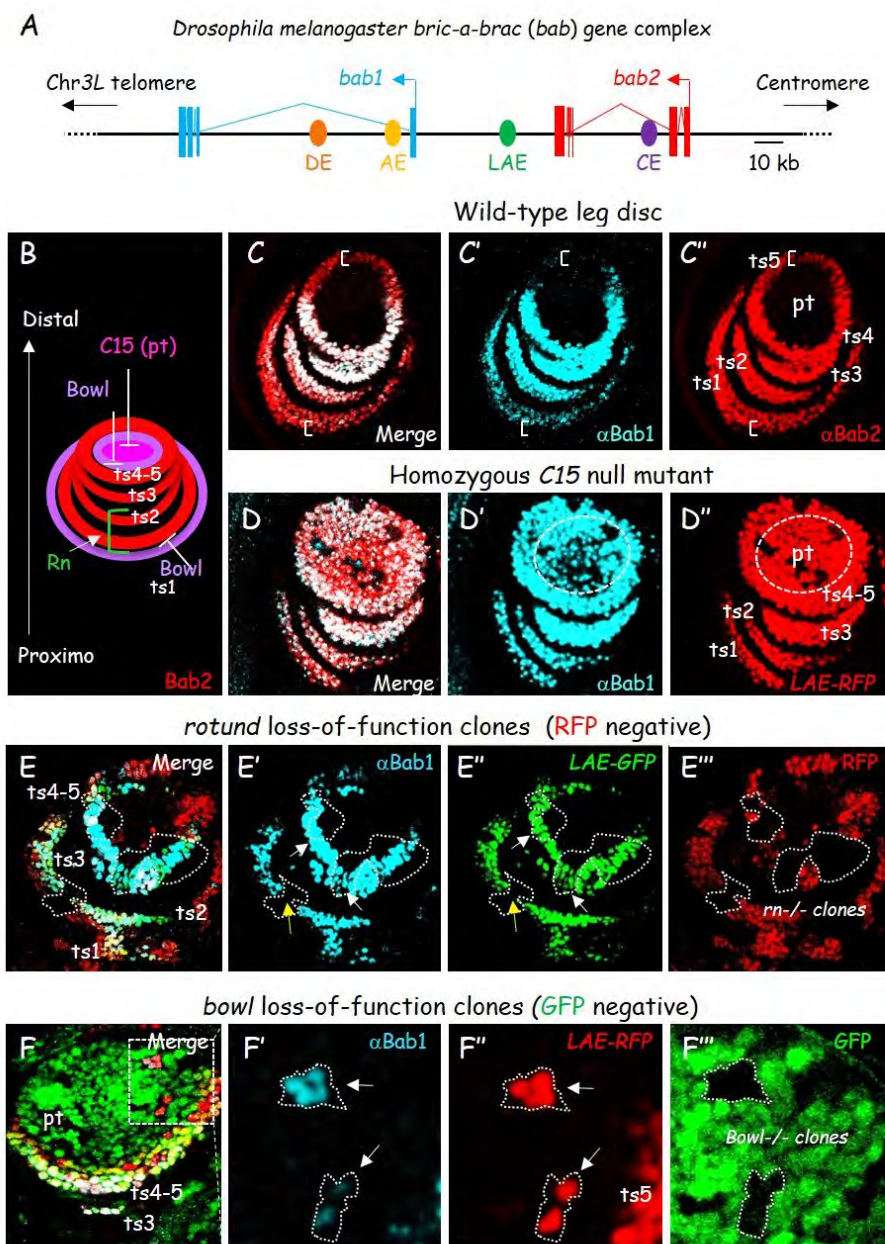

**Fig 1. *C15*, *rotund* and *bowl* all regulate both *bab1* and *bab2*.** (A) Schematic view of the *Dmel* *bab* locus on the 3L chromosomal arm (Chr3L). The tandem *bab1* (blue) and *bab2* (red) transcription units (filled boxes and broken lines represent exons and introns, respectively), the previously known CRE/enhancers are depicted by filled dots (abdominal DE and AE in dark and light orange, respectively; leg/antennal LAE in dark green and cardiac CE in purple), and the telomere and centromere directions are indicated by arrows. (B) A scheme depicted *C15*, Bowl and Rn TF activities in regulating *bab2* expression as a four-ring pattern within the developing distal leg, is shown. (C) Medial confocal view of a wild-type L3 leg disc. Merged Bab1 (blue) and Bab2 (red) immunostainings, as well as each marker in isolation in (C') and (C''), respectively, are shown. Positions of *bab2*-expressing ts1-5 cells and the pretarsal (pt) field are indicated in (C''). Brackets indicate paralogue-specific expression in proximalmost and distalmost *bab2*-expressing cells. (D) Distal confocal view of a homozygous *C15*<sup>2</sup> mutant L3 leg disc expressing *LAE-RFP*. Merged Bab1 immunostaining (in blue) and RFP fluorescence (red), and each marker in isolation in (D') and (D''), are shown. Bab2-expressing mutant pt cells are circled with a dashed line in (D') and (D''). (E) Medial confocal view of a mosaic L3 leg disc expressing *LAE-GFP* and harboring *rotund* mutant clones. Merged Bab1 (blue) immunostaining, GFP (green) and RFP (red) fluorescence, as well as each marker in isolation in (E'), (E'') and (E'''), respectively, are shown. Mutant clones are detected as black areas, owing to the loss of RFP. The respective ts1-5 fields are indicated in (E). White and yellow arrows indicate *bab1* (*bab2*) still- and non-expressing *rotund*<sup>-/-</sup> clones, respectively. (F) Distal confocal view of a mosaic L3 leg disc expressing *LAE-RFP* and harboring *bowl* mutant clones. Merged Bab1 (blue) immunostaining, RFP (red) and GFP (green) fluorescence, as well as a higher magnification of the boxed area for each marker in isolation in (F'), (F'') and (F'''), respectively, are shown. Mutant clones are detected as black areas, owing to the loss of GFP. White arrows indicate pretarsal *bowl*<sup>-/-</sup> clones ectopically expressing both *bab1* and *LAE-RFP* (*bab2*).

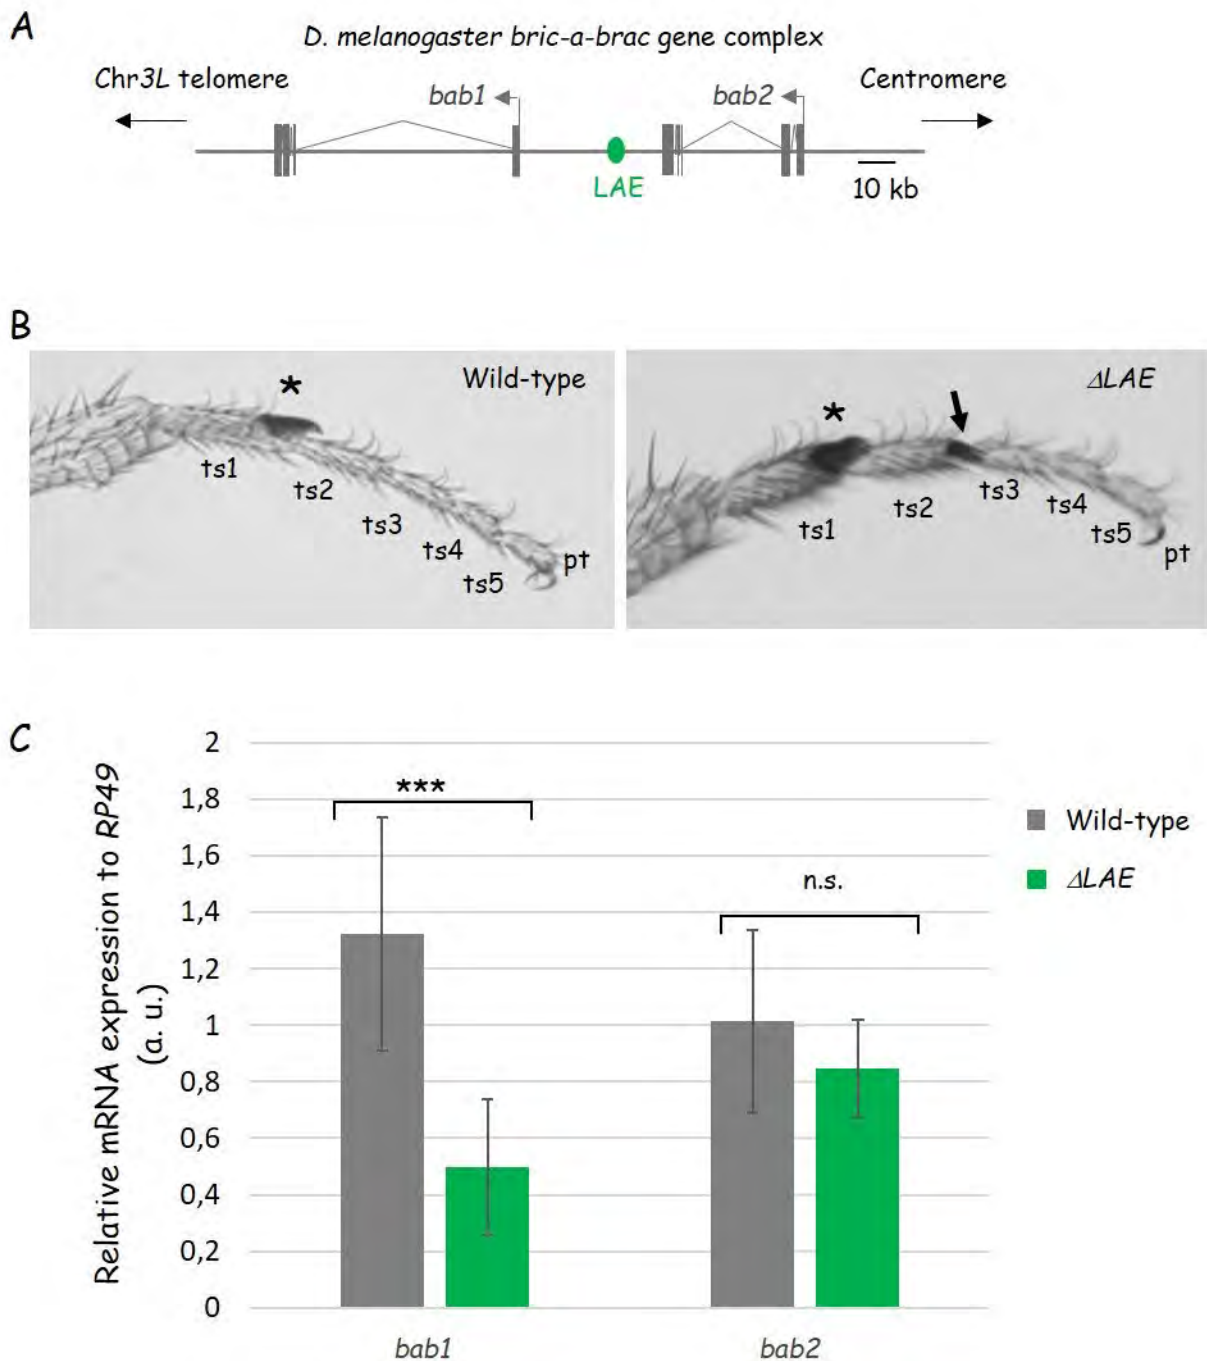

**Fig 2. LAE is not critically required for tarsal segmentation and for overall *bab2* expression in the leg disc.** (A) Schematic view of the *Dmel* *bab* locus on the 3L chromosomal arm (Chr3L). The tandem *bab1* and *bab2* transcription units (filled boxes and broken lines represent exons and introns, respectively), the intergenic LAE enhancer (in green), as well as the telomere and centromere directions, are depicted as in Fig 1A, except that both genes are depicted in grey. The small CRISPR/Cas9-mediated chromosomal deficiency (*bab<sup>ΔLAE</sup>*) is shown in beneath (deleted LAE is depicted as a broken line). (B) Photographs of wild-type and homozygous *bab<sup>ΔLAE</sup>* T1 distal legs from adult males. The regular sex-comb (an array of about 10 specialized bristles on the male forelegs) on distal ts1 is indicated with asterisks, while ectopic sex-comb bristles on distal ts2 from the mutant leg (right) is indicated by an arrow. Note that the five tarsal segments remain individualized in homozygous *bab<sup>ΔLAE</sup>* mutant legs. (C) Overall *bab1-2* expression from wild-type and homozygous *bab<sup>ΔLAE</sup>* L3 leg discs, as determined from reverse transcription quantitative PCR analyses. The *bab1-2* expression levels were quantified relative to *rp49* mRNA abundance.



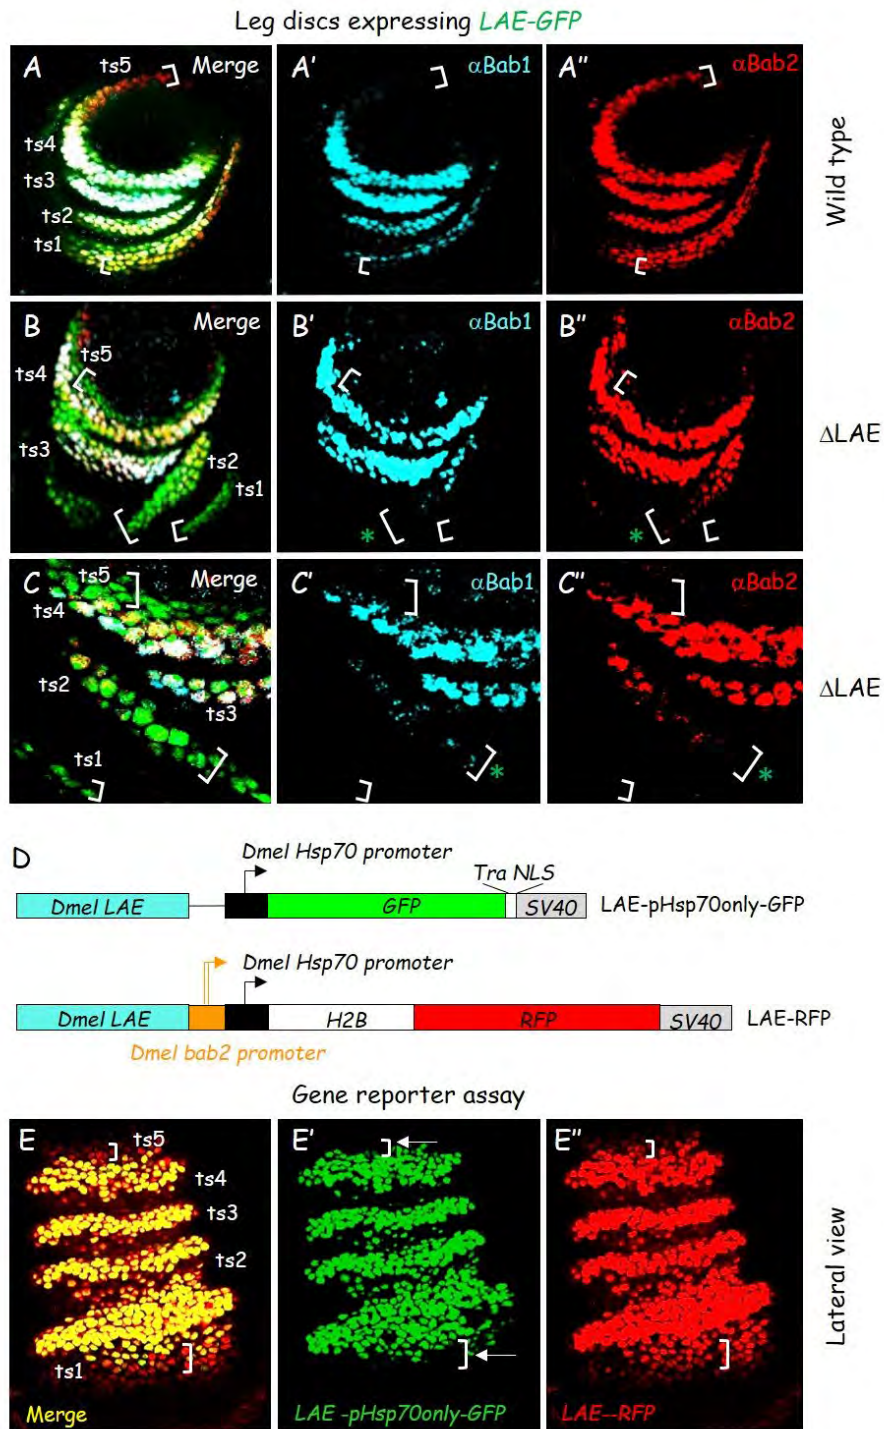

**Fig 3. LAE is mostly critically required for paralog-specific *bab2* expression in the developing distal legs.** (A-C) Medial (A-B) and distal (C) confocal views of wild-type (A) and homozygous *bab<sup>DLAE</sup>* mutant (B and C) L3 leg discs expressing *LAE-GFP*. Merged GFP fluorescence (green), Bab1 (blue) and Bab2 (red) immunostainings, as well as the two latter in isolation in (A'-C') and (A''-C''), respectively, are shown. Brackets indicate positions of paralog-specific expression in proximalmost (*ts1*) and distalmost (*ts5*) *bab2*-expressing (GFP+) cells. Green asterisks in (B'-B'') and (C'-C'') indicate weaker expression of both *bab* paralogs in GFP+ *ts2* cells. (D) Modular structures of the *LAE-pHsp70onlyGFP* and *LAE-RFP* reporter constructs. GFP (green box) and RFP (red box) open-reading frames (ORFs) have been fused with ORFs for the Transformer (Tra) nuclear localization signal (NLS) and the histone H2B, respectively (see white boxes). The *SV40* polyadenylation signal region is boxed in grey. The *Dmel LAE* sequence is boxed in blue. The classical non-heat-inducible basal *Hsp70* promoter sequence is boxed in black, while the *bab2* core promoter sequence is depicted in orange. Note that both promoters are juxtaposed in the *LAE-RFP* construct. (E) LAE activity requires functionally the *bab2* promoter to ensure paralog-specific expression in the developing legs. A lateral confocal view of merged GFP (green) and RFP (red) fluorescence, as well as each marker in isolation in (E') and (E''), respectively, of the distal part of an early pupal leg expressing both the *LAE-pHsp70onlyGFP<sup>ZH2A</sup>* and *LAE-RFP<sup>ZH86Fb</sup>* reporter constructs (depicted in (D)), are shown. Brackets indicate tarsal RFP+ cells expressing *bab2* in a paralog-specific manner, which never express the *LAE-pHsp70onlyGFP<sup>ZH2A</sup>* reporter which lacks *bab2* core promoter sequences (see white arrows).

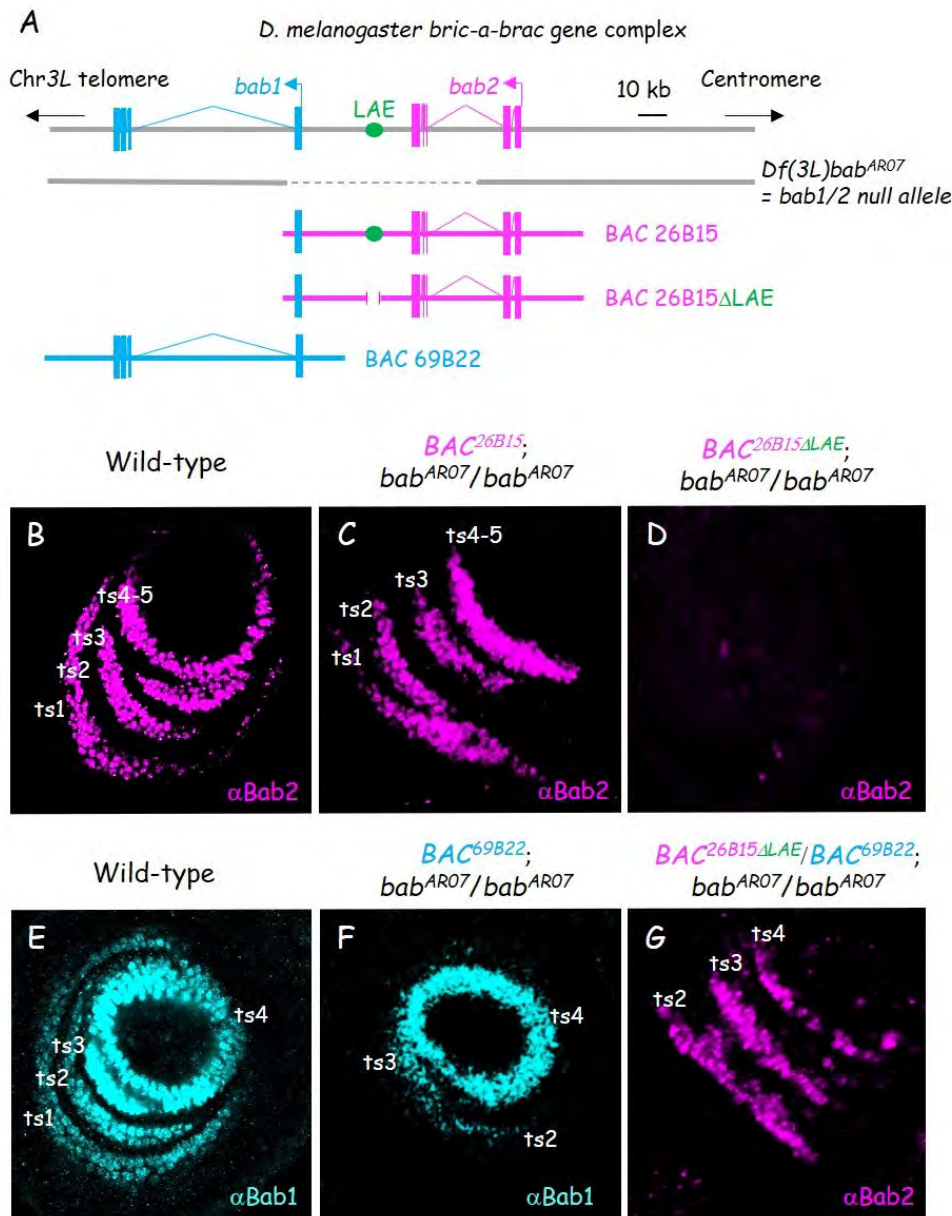

**Fig 4. *bab1* includes partially-redundant limb-specific *cis*-regulatory information.** (A) Chromosomal deficiency and BAC constructs covering the *bab* locus. The tandem gene paralogs and intergenic LAE are depicted as shown in Fig. 1A, except that *bab2* is depicted in pink instead of red. The *bab<sup>AR07</sup>* 3L chromosomal deficiency is shown in beneath, with known deleted portion indicated by a dashed line. Note that the breakpoints have not been precisely mapped. The two overlapping BAC constructs *69B22* and *26B15*, as well as a mutant derivative of the latter specifically-deleted for LAE, are shown further in beneath. (B-G) Medial confocal views of wild-type (B-E) and homozygous *bab<sup>AR07</sup>* mutant (C-D and F-G) L3 leg discs, harboring singly or combined X-linked BAC construct(s) shown in (A), as indicated above each panel. Bab2 (pink) and Bab1 (blue) immunostainings are shown. Positions of *bab1*- and *bab2*-expressing ts1-4 cells are indicated. Note stochastic *bab2* expression in (G).

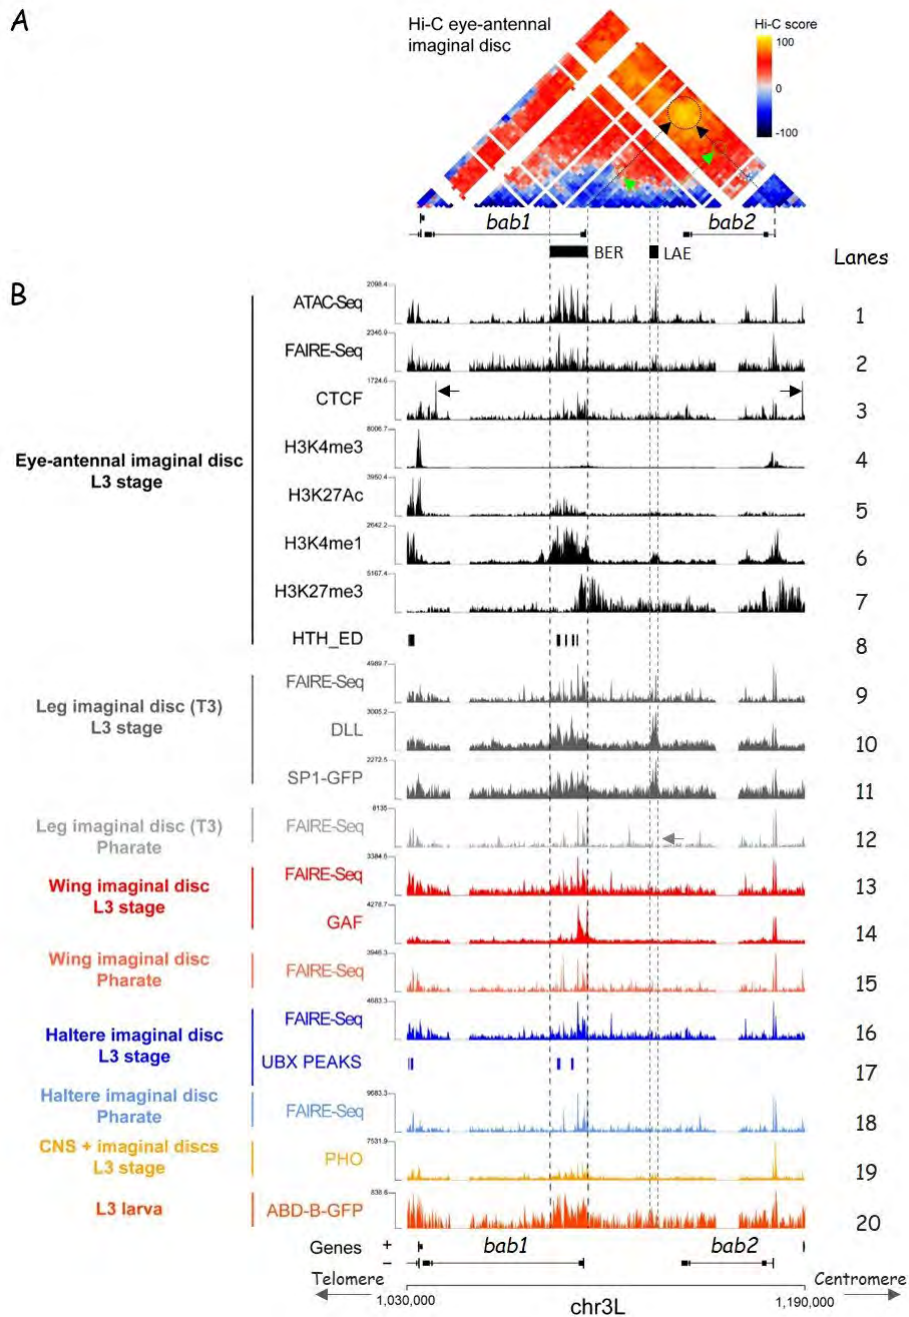

**Fig 5. A topologically-associating domain encompasses the *bab* locus in the eye-antennal disc and genome-wide chromatin features identify an enhancer signature region (BER) within *bab1*.** (A) Hi-C screenshot of a 160 kb region covering the *Dmel bab* gene complex. Score scale is indicated on the right (yellow to dark blue from positive to negative). (B) ATAC-, FAIRE- and/or ChIP-Seq profiles from L3 eye-antennal (ED), leg, wing and haltere discs as well as from adult pharate appendages (leg, wing and haltere) and from whole larval tissues, as indicated on the left side. As referred in the main text, lanes are numbered on the right side. ChIP-Seq peak calling data are shown in lanes 8, 17-18. Otherwise, normalized open chromatin, histone H3 post-translational modifications and TF binding profiles are shown. Positions of the tandem *bab1-2* genes are indicated on the bottom. The respective locations of the BER and LAE sequences are highlighted with vertical dashed lines. Of note, according to normalized FAIRE-Seq signals, LAE is not fully accessible in the pharate T3 leg (see grey arrow in lane 12). Strongest CTCF ChIP-Seq signals are indicated by horizontal black arrows (lane 3).

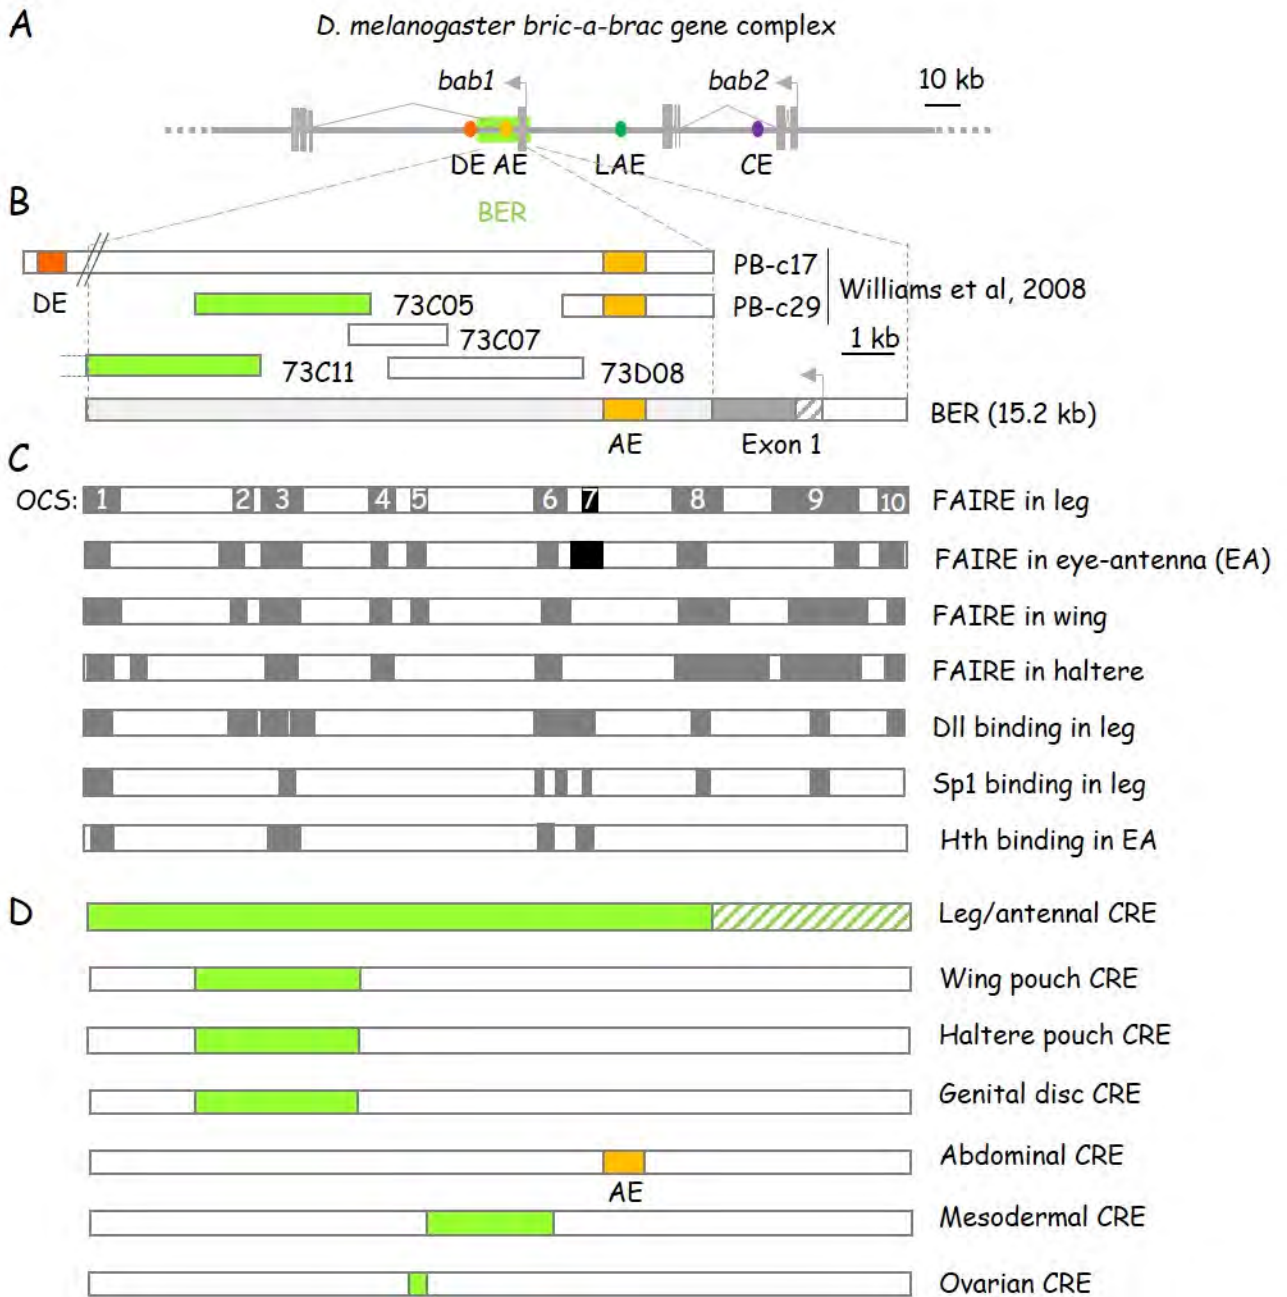

**Fig 6. BER behaves as a composite pleiotropic enhancer.** (A) The BER enhancer signature region includes the abdominal AE enhancer. Organization of the *Dmel bab* locus, with the tandem gene paralogs as depicted as in Fig. 2A. The characterized enhancers are depicted by filled dots (abdominal DE and AE in dark and light orange, respectively; leg/antennal LAE in dark green and cardiac CE in purple). BER is boxed in light green. The genomic portions of the overlapping *69B22* and *26B15* BAC constructs are shown in beneath. (B) Transgenic lines covering BER identify *cis*-regulatory elements driving reporter gene expression in diverse larval imaginal tissues. Genomic fragments covered by relevant Janelia Farm FlyLight reporter lines [77] and the DE- and/or AE-containing PB-c17 and PB-c29 genomic constructs, described in [14], are shown above a scheme of the BER region. *bab1* protein coding and 5'-untranslated sequences within the first exon are filled or hatched in dark grey, respectively, while the intronic region is in light gray. The AE sequence is in orange, as depicted in (A). FlyLight reporter lines driving reporter expression in diverse imaginal discs (see S4 Fig) are filled in light green. (C) BER includes open chromatin sequences (OCS) and is bound by Dll, Sp1, Hth TFs in diverse developing appendages (leg, eye-antenna, wing and haltere). OCS and TF-bound sequences are depicted by filled grey/black boxes. Numbers refer to OCSs detected in the leg discs (see main text). The black boxes represent OCSs detected in the eye-antennal (EA) and leg but not in wing and haltere discs. OCS and Dll or Sp1-bound regions, as determined from peak calling (FAIRE-Seq GSE38727 and ChIP-Seq GSE113574 GEO dataset series, respectively), are from [40] and [42], respectively. ChIP-Seq data for Hth are from [78]. (D) BER includes pleiotropic *cis*-regulatory elements (CREs). Locations of predicted CREs (see text) are indicated by light green boxes. The hatched part of the predicted leg/antennal CRE is inferred from data obtained with the PB-c17 construct reported in [14].

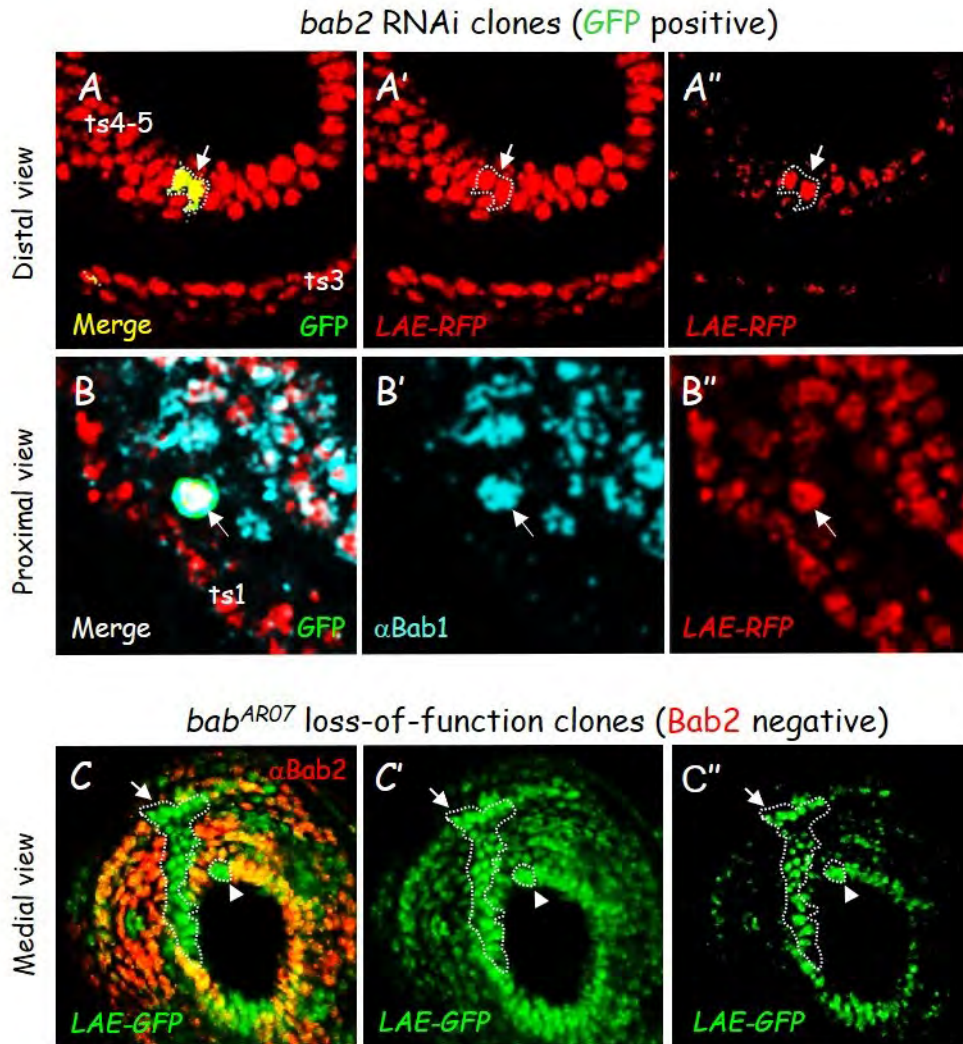

**Fig 7. Auto- and cross-regulation among the two *bab* paralogs in the developing legs.** (A) Distal confocal view of a L3 leg disc expressing *LAE-RFP* and harboring flip-out (FO) clones expressing interfering RNA against *bab2*. Merged RFP (red) and GFP (green) fluorescence, as well as the former in isolation and under two distinct signal magnification (A' and A''), are shown. A FO clone (GFP+) within *LAE-RFP* (*bab2*)-expressing ts4 cells is circled with a dashed line (see arrow). (B) Proximal confocal view of a L3 leg disc expressing *LAE-RFP* and harboring FO clones expressing interfering RNA against *bab2*. Merged Bab1 (blue) immunostaining, RFP (red) and GFP (green) fluorescence, as well as the two formers in isolation, in (B') and (B''), respectively, are shown. Note that a single-cell FO clone (GFP+), within *LAE-RFP* (*bab2*)-expressing ts1 cells, is sufficient to upregulate *bab1* (see arrows). (C-D) L3 leg (C) and eye-antennal (D) discs expressing *LAE-GFP* and harboring mutant clones for the protein null allele *bab<sup>AR07</sup>*. Merged Bab2 (red) immunostaining and GFP (green) fluorescence as well as the latter in isolation under two distinct signal magnifications (C'-C'' and D'-D''), are shown. Tiny and larger clones (Bab2 negative) are circled with dashed lines (arrowheads and arrows, respectively).

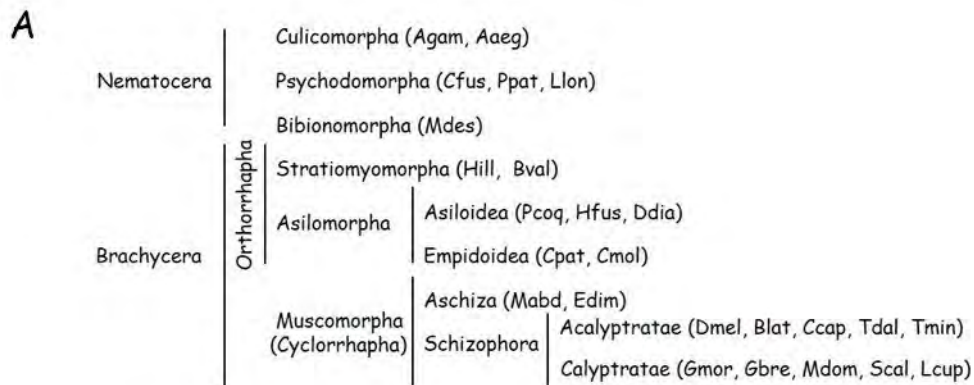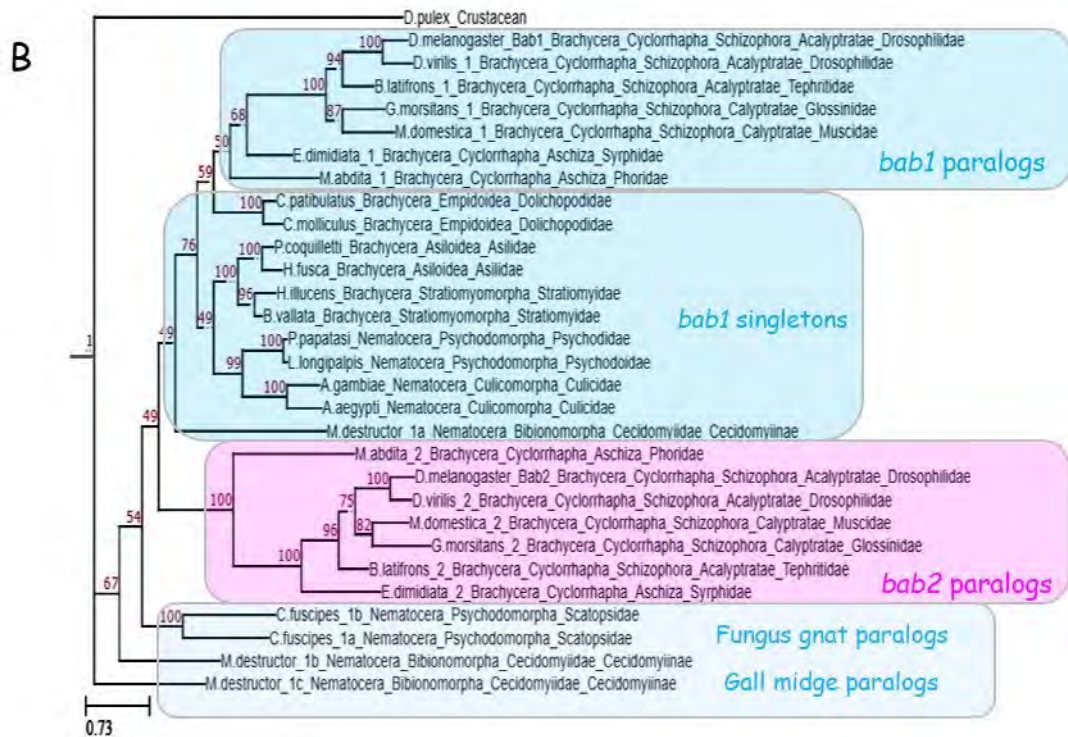

**Fig 8. Phylogenetic relationships among dipteran *bab* paralogs and orthologs.** (A) Dipteran families studied in this work. Species abbreviations are described in Supplementary data. (B) Phylogenetic relationships of the *bab* paralogs and orthologs inferred from a maximum likelihood consensus tree constructed from 1000 bootstrap replicates. Support values (percentage of replicate trees) are shown in red. Scale bar represents substitution per site. Clustered positions of *bab2* paralogs and *bab1* paralogs/orthologs are shown in pink and light blue, respectively.

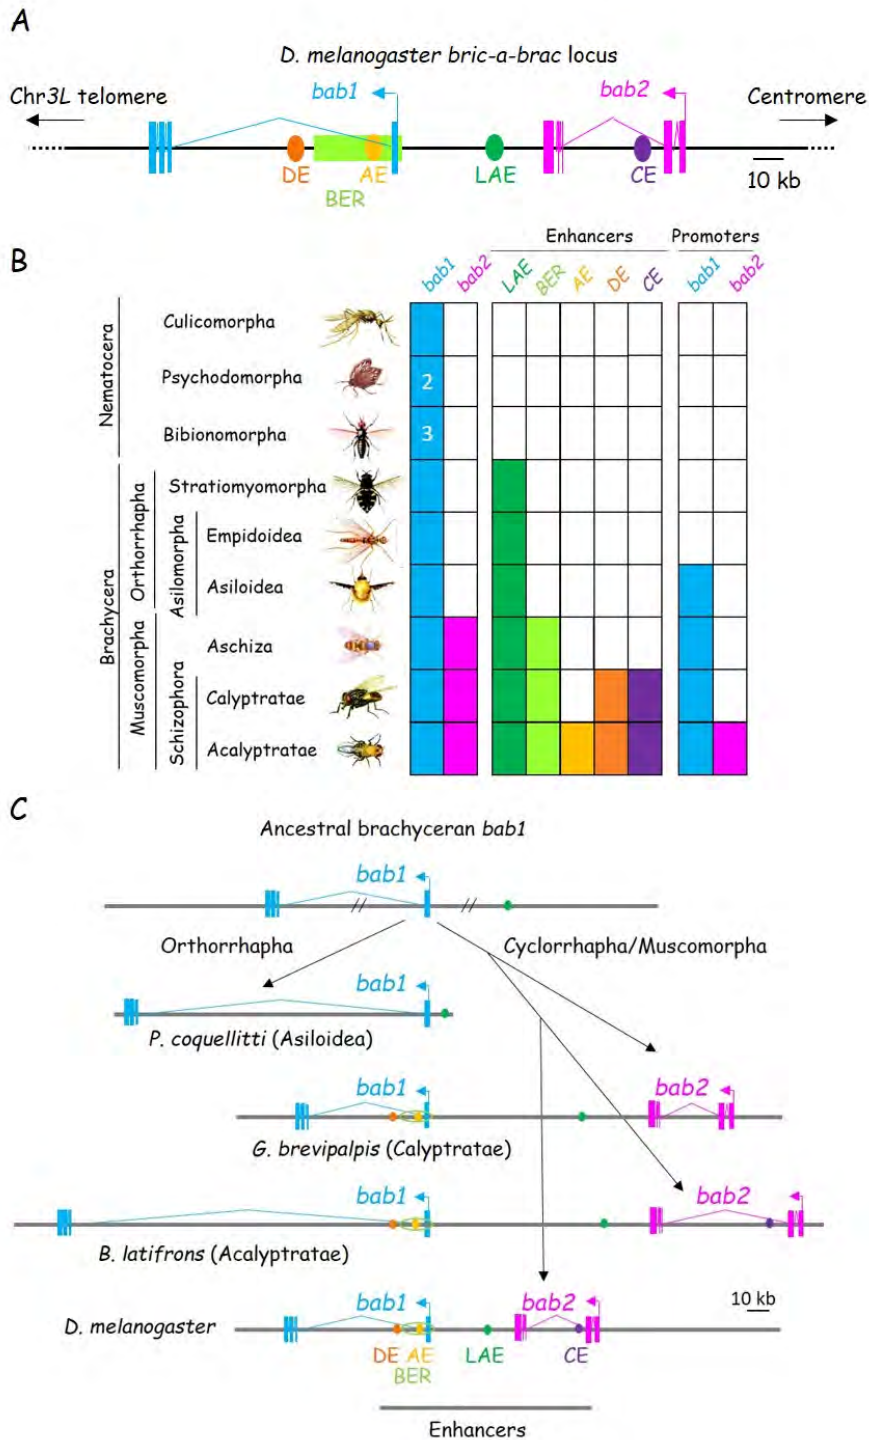

**Fig 9. Conservation of enhancer/promoter sequences and evolutionary history of the *bab* locus among the Brachycera.** (A) Organization of the *Dmel* *bab* gene paralogs and enhancers. The locus is depicted as in Fig 1A, except that *bab2* is represented in pink instead of red. (B) Evolutionary conservation of the *bab* gene paralogs, enhancers and promoters among diverse dipterans. Infraorders, sections, subsections and superfamilies are indicated on the left, arranged in a phylogenetic series from the “lower” Nematocera to the “higher” Brachycera suborders. Presence of *bab1* and/or *bab2* paralogs and conservation of enhancer and promoter sequences are indicated by filled or hatched boxes colored as depicted in (A). (C) Evolutionary scenario for the *bab* locus within the Brachycera suborders. A scheme depicting chromosomal fate of an ancestral *bab1*-like gene which gives rise to derived extant orthorrhaphan singletons (Asilomorpha) and Muscomorpha-specific paralogous (Calypttratae and Acalypttratae) genes. Locations of conserved enhancer sequences are shown, as depicted in (A).

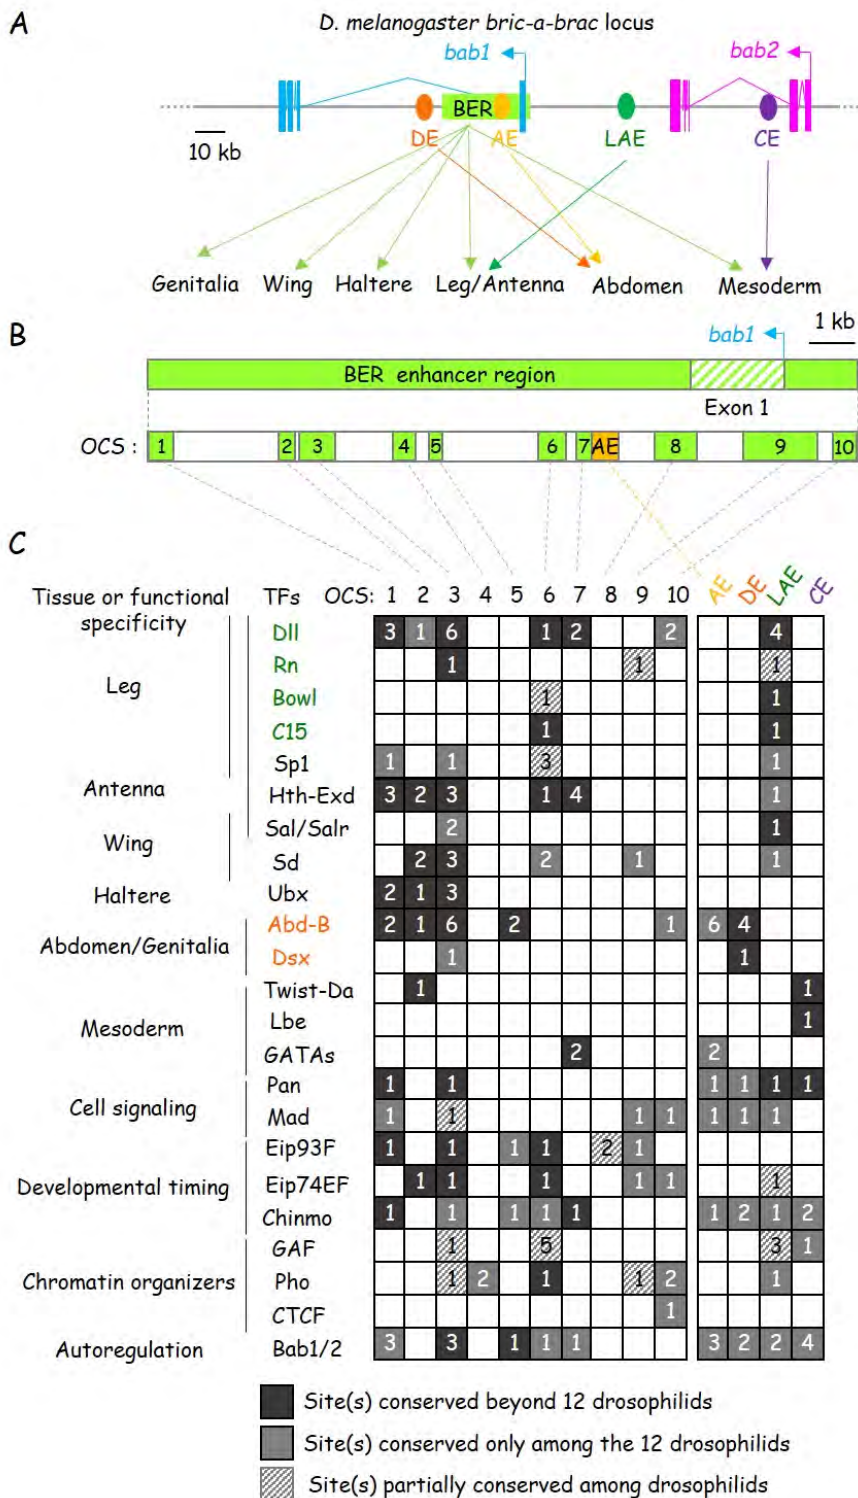

**Fig 10. A comprehensive predictive tissue-specific TF code governing *bab* paralog expression.** (A) Organization of the *Dmel bab* gene paralogs and enhancers, as depicted in Fig 9A. Expression tissue specificities conferred by each enhancer are shown in beneath. (B) BER structural and chromatin state organizations. The *bab1* first exon is hatched. OCS regions (see Fig 6C), as defined in leg tissues; are represented by light green boxes. The abdominal AE CRE (not detected in FAIRE-Seq data from leg and eye-antennal discs) is depicted as a light orange box. (C) Evolutionary conservation of predicted TF binding sites within *Dmel bab* cis-regulatory sequences. Site conservation among and beyond drosophilids of transcriptional regulators involved in tissue-specific morphogenetic processes, cell signaling, developmental timing and chromatin organization. Predicted/validated TF site numbers are indicated within colored or hatched boxes reflecting their relative conservation are indicated in beneath. Experimentally-validated direct *bab* regulators are colored according to their well characterized bound-enhancer sequences (see A).



Wild-type leg disc

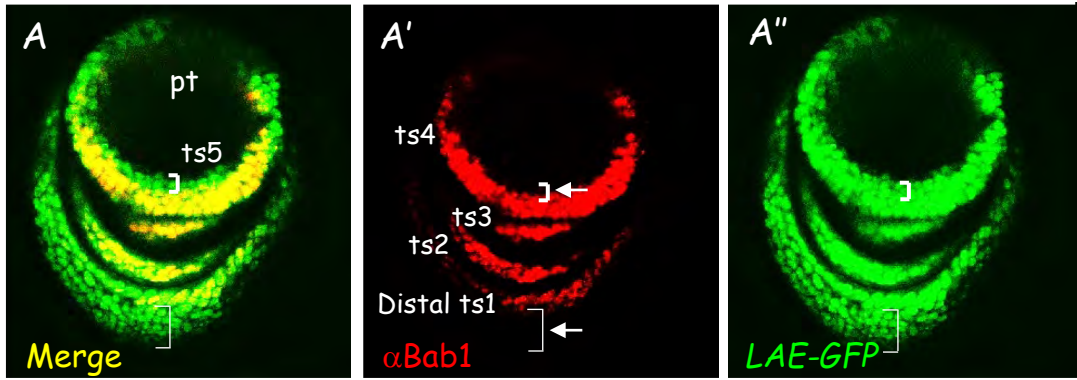

rotund gain-of-function (Dll domain)

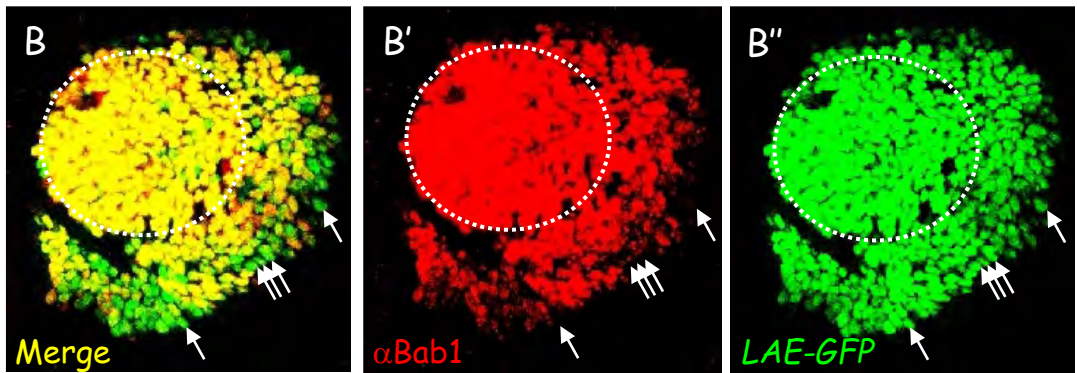

bowl gain-of-function clones (FO lines RNAi; GFP+)

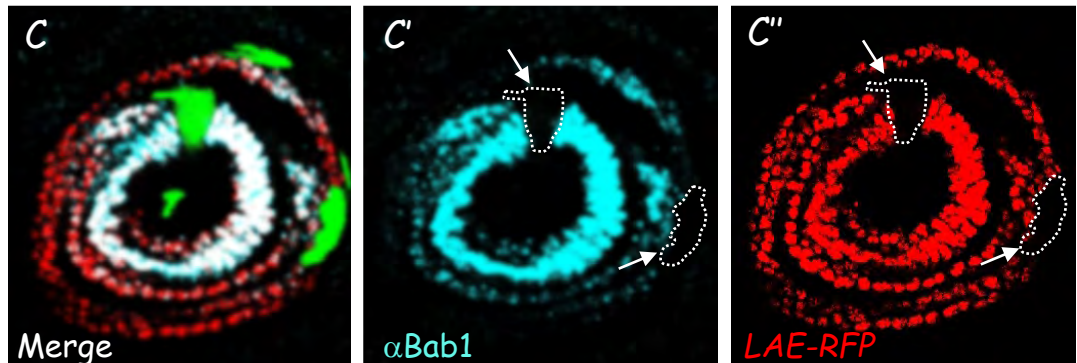

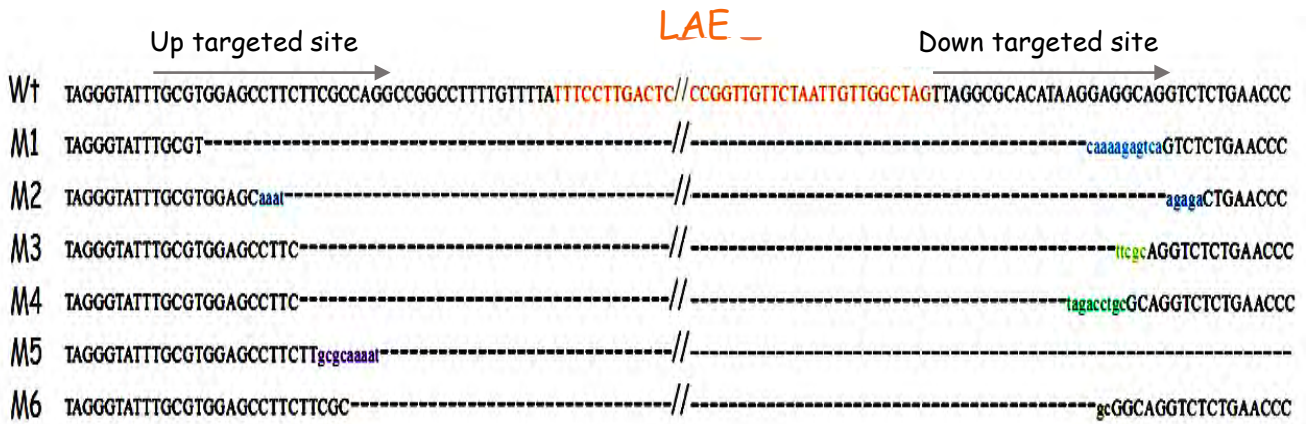

A

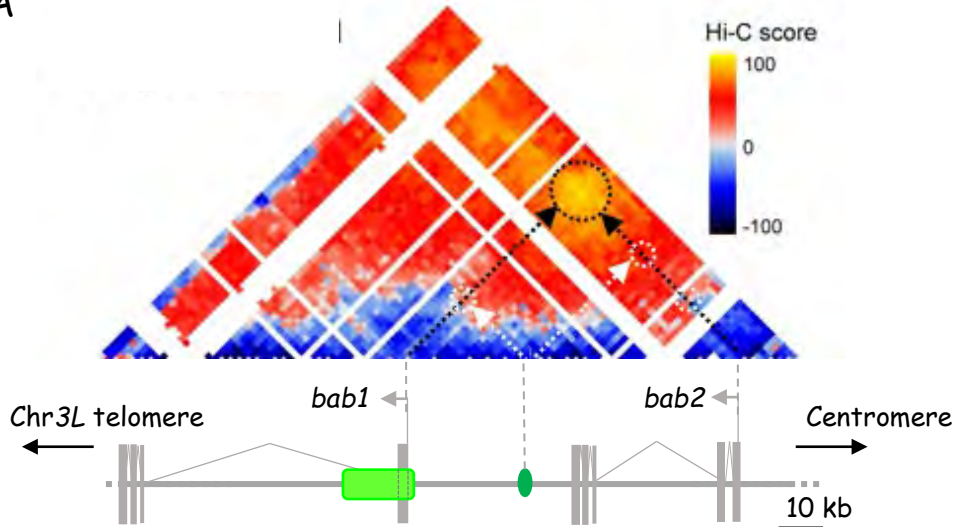

B

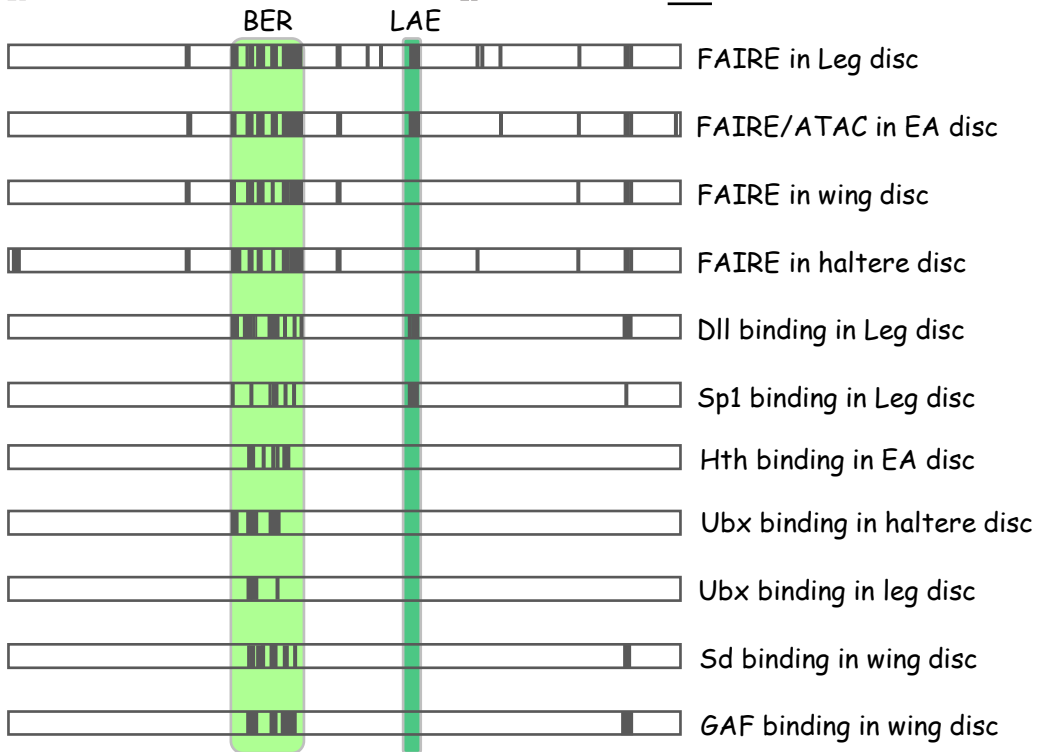

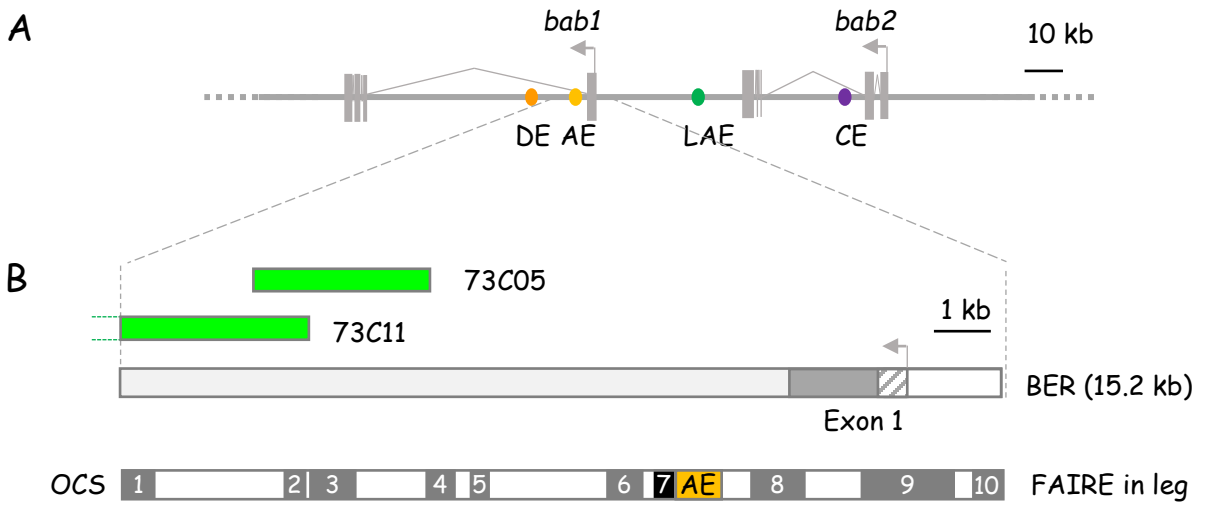

*73C11-Gal4 + UAS-GFP*

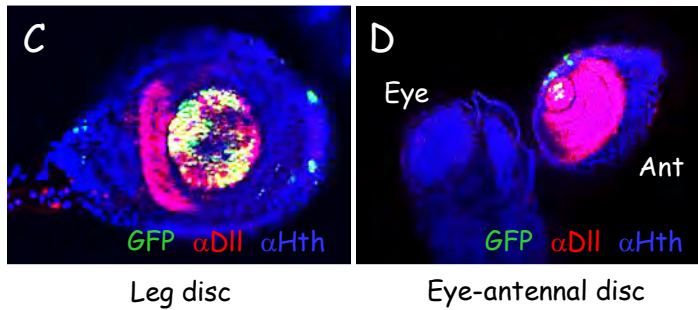

*73C05-Gal4 + UAS-GFP*

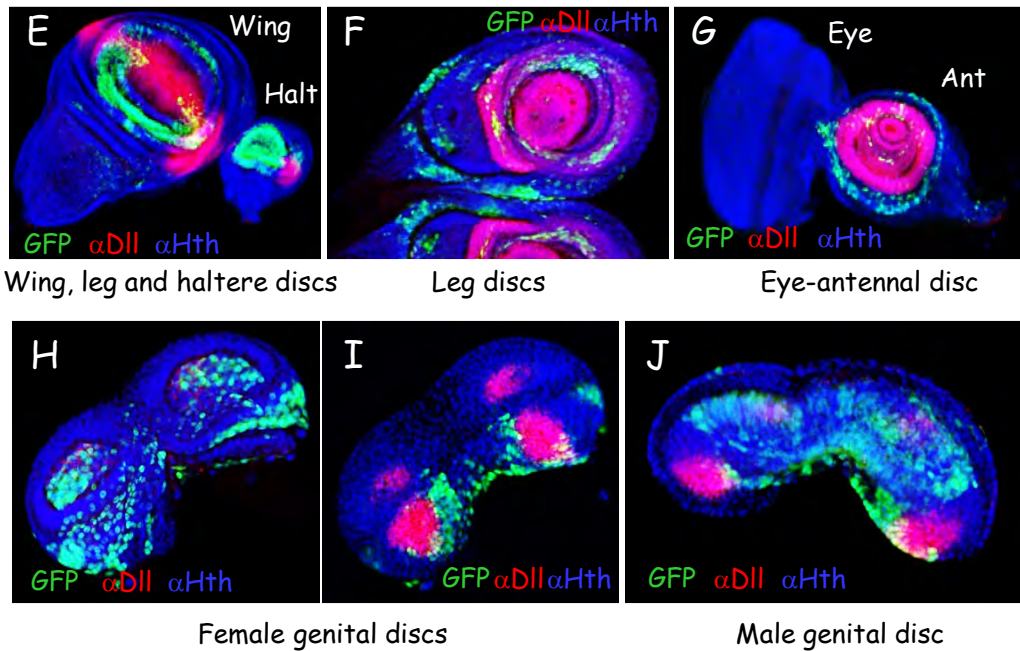

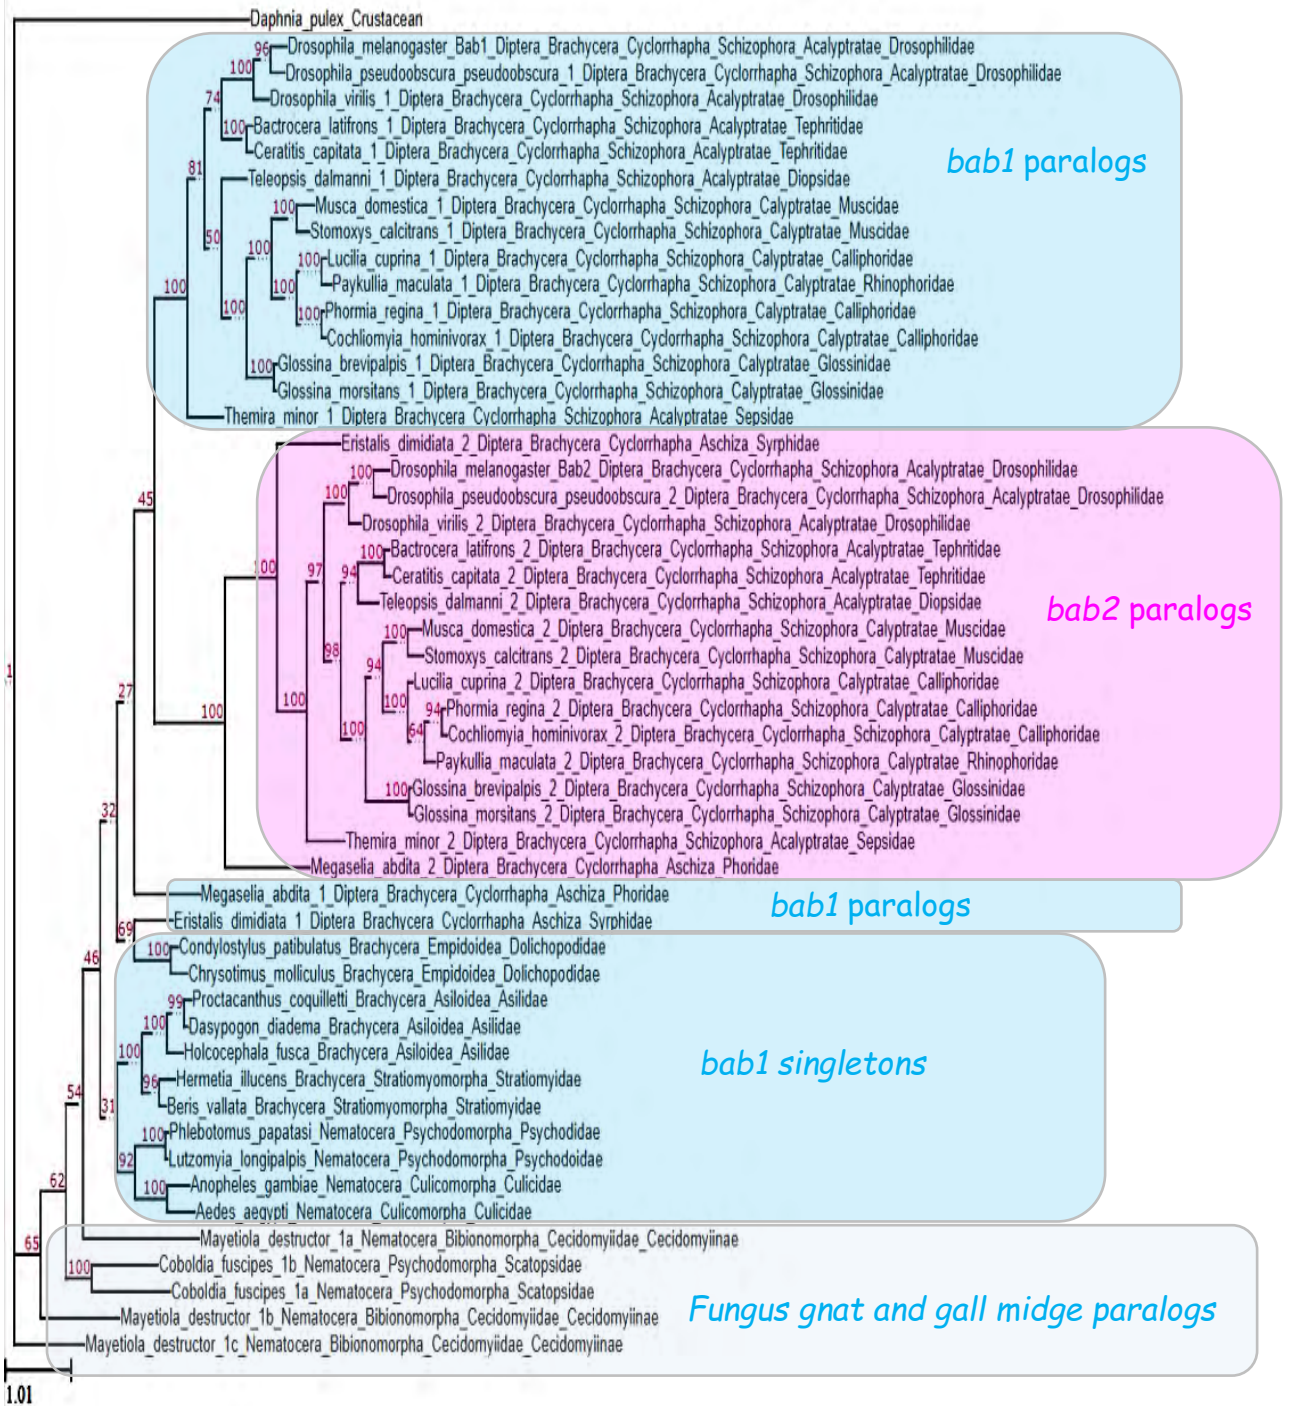

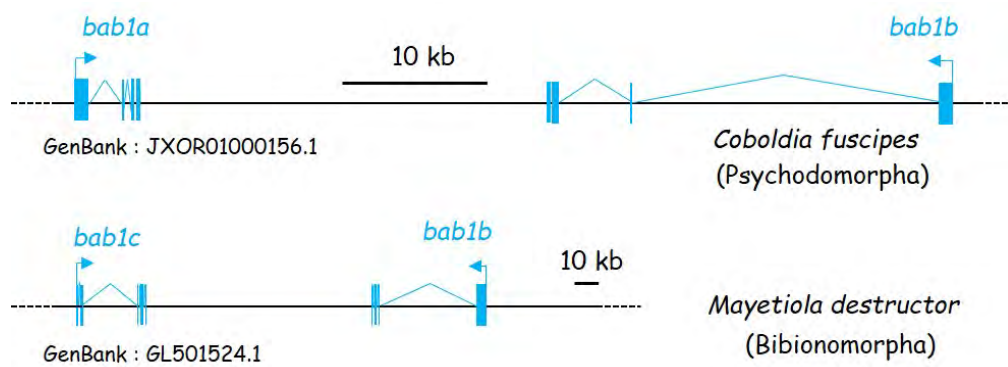

A

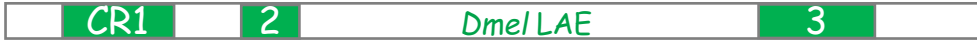

B

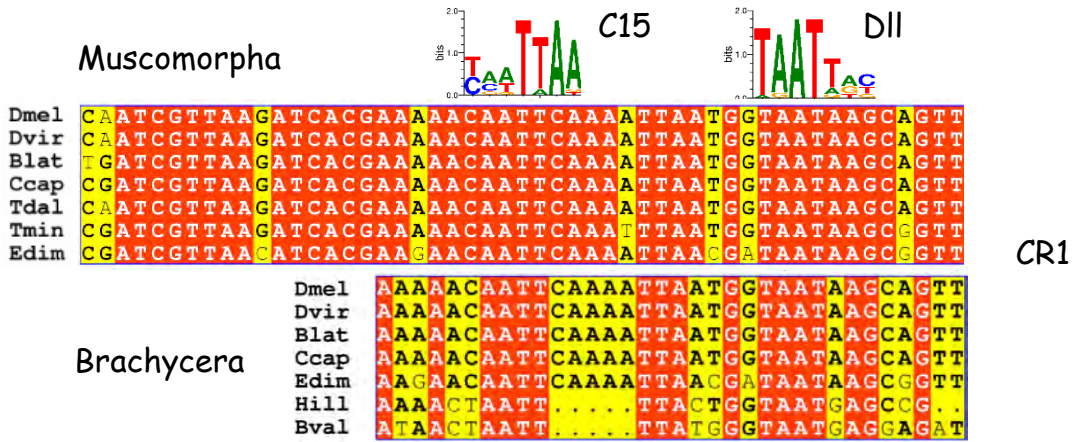

C

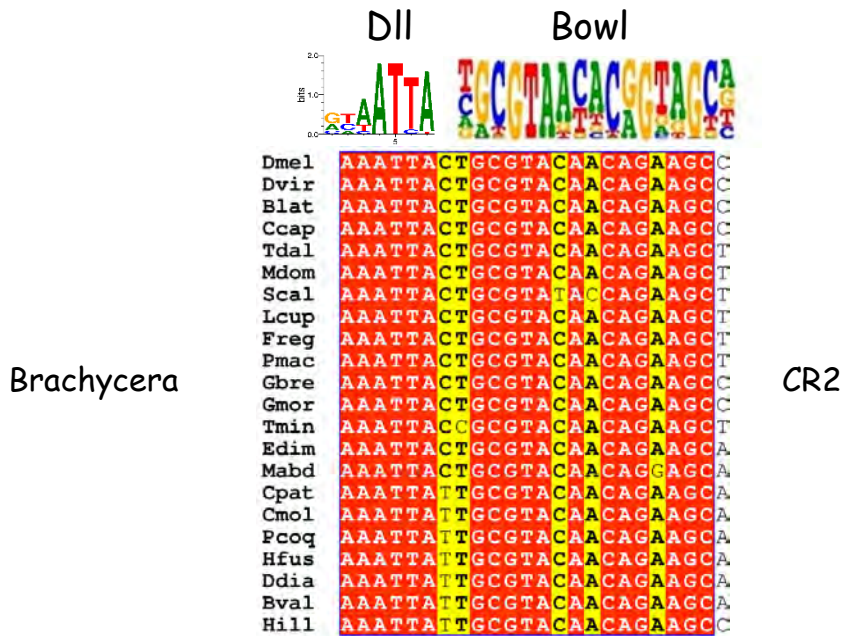

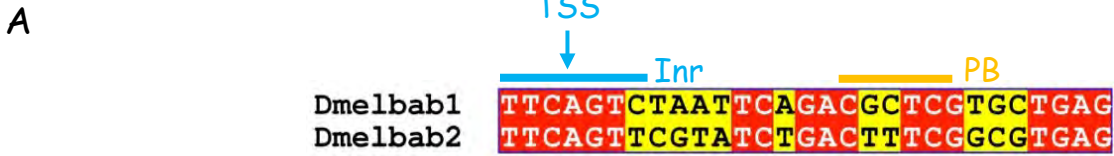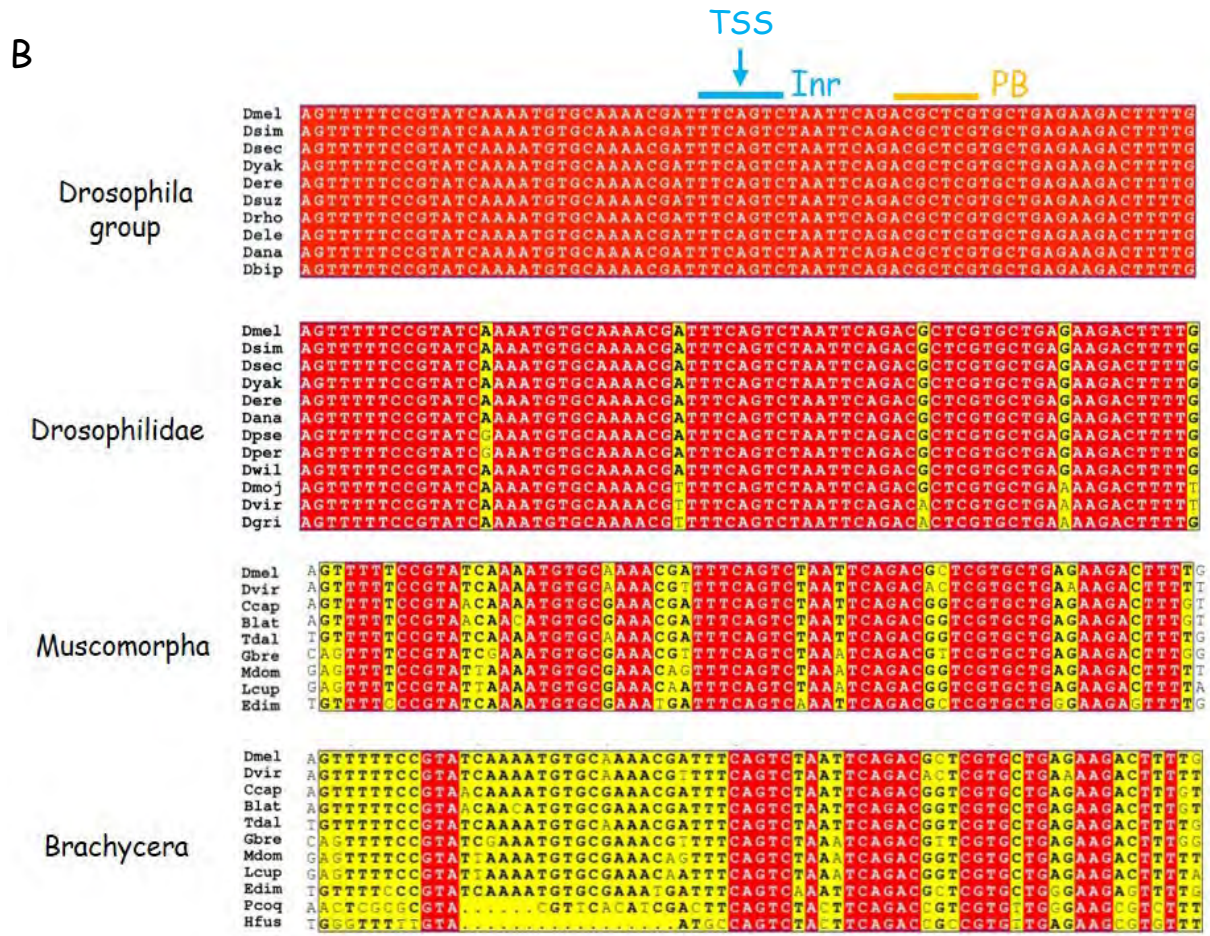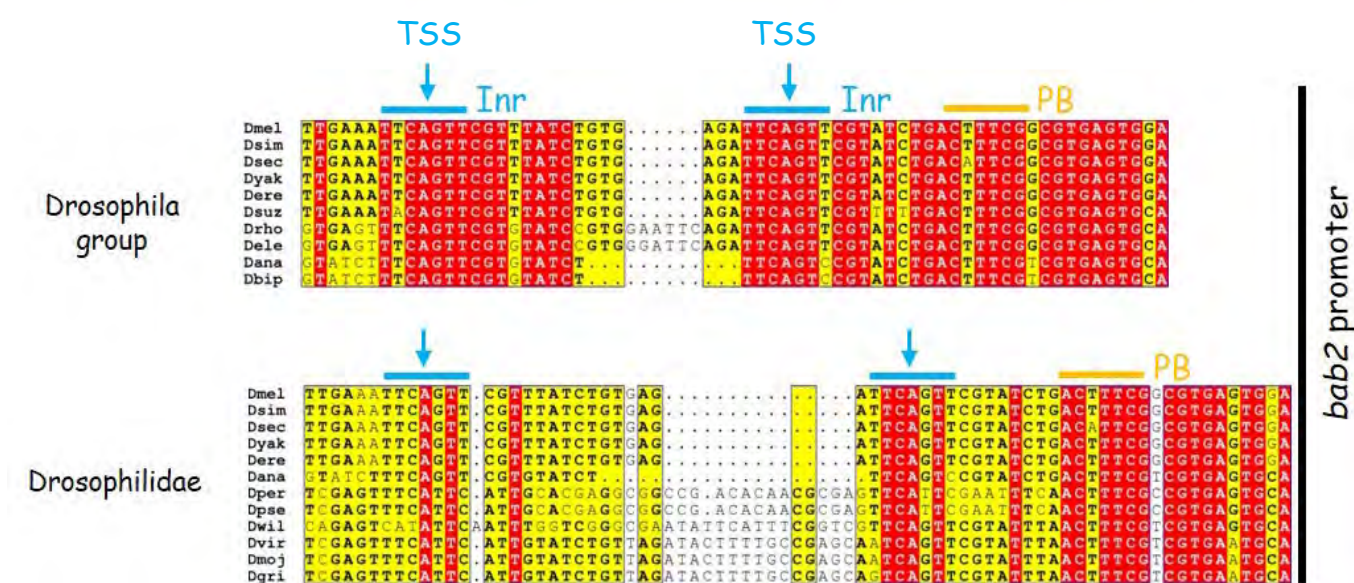



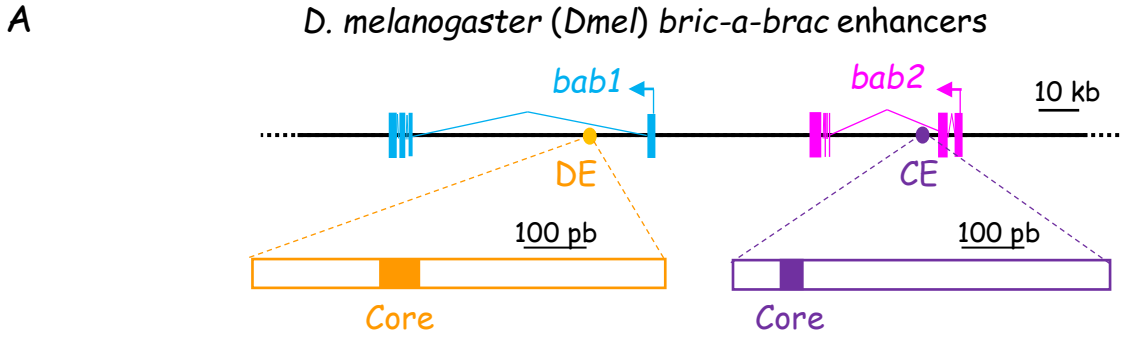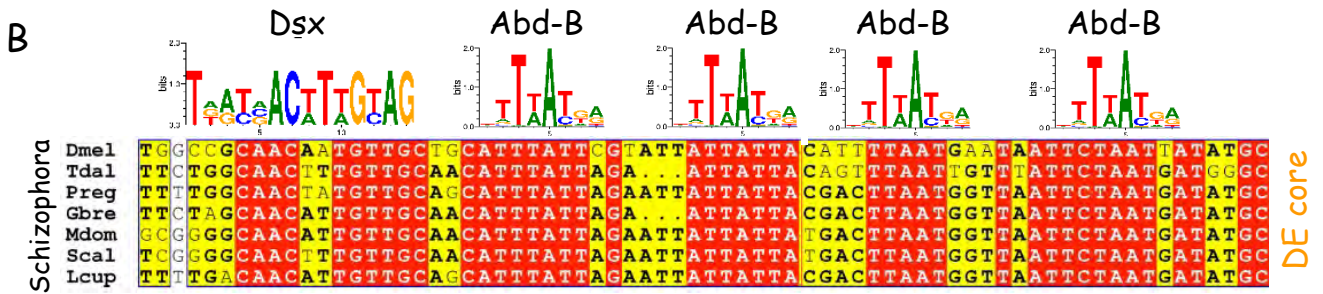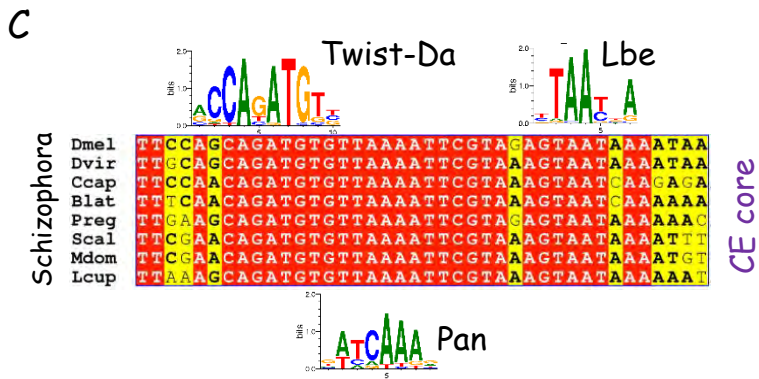

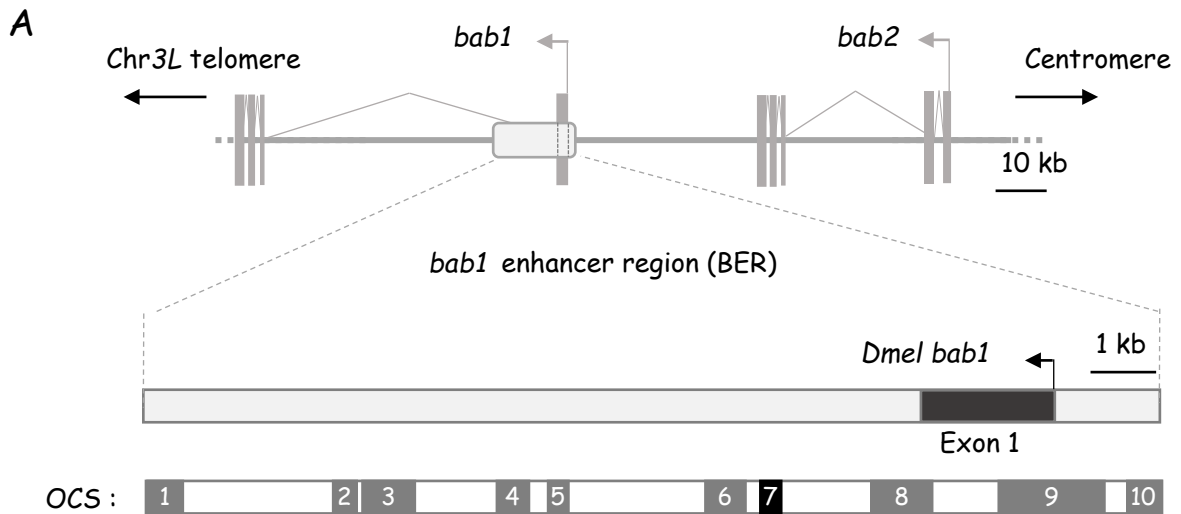

**B** Muscomorphan families      OCS : 1 2 3 4 5 6 7 8 9 10

|                                 |               |                                                    |                                  |   |   |   |   |   |   |   |   |   |
|---------------------------------|---------------|----------------------------------------------------|----------------------------------|---|---|---|---|---|---|---|---|---|
| Schizophora                     | Acalypttratae | <i>Drosophilidae</i>                               | 4                                | 2 | 8 | 1 | 4 | 3 | 6 | 2 | 4 | 3 |
|                                 |               | <i>Tephritidae</i> ( <i>Blat</i> , <i>Ccap</i> )   | 2                                | 1 | 5 |   | 1 | 1 | 5 |   | 1 |   |
|                                 |               | <i>Diopsidae</i> ( <i>Tdal</i> )                   | 2                                | 1 | 5 |   | 1 | 1 | 5 |   | 1 |   |
|                                 |               | <i>Sepsidae</i> ( <i>Tmin</i> )                    | 1                                |   | 2 |   |   | 1 | 1 |   | 1 |   |
|                                 | Calypttratae  | <i>Glossinidae</i> ( <i>Gbre</i> , <i>Gmor</i> )   | 1                                |   | 3 |   |   | 1 | 3 |   | 1 |   |
|                                 |               | <i>Muscidae</i> ( <i>Mdom</i> , <i>Scal</i> )      |                                  | 1 | 1 |   |   | 1 | 1 |   | 1 |   |
|                                 |               | <i>Calliphoridae</i> ( <i>Lcup</i> , <i>Preg</i> ) |                                  | 1 | 2 |   |   | 1 | 3 |   | 1 |   |
|                                 |               | <i>Rhinophoridae</i> ( <i>Pmac</i> )               |                                  | 1 | 2 |   |   | 1 | 2 |   | 1 |   |
|                                 |               | Aschiza                                            | <i>Syrphidae</i> ( <i>Edim</i> ) |   |   | 1 |   |   |   |   |   | 1 |
| <i>Phoridae</i> ( <i>Mabd</i> ) |               |                                                    |                                  | 1 |   |   |   |   |   | 1 |   |   |

 Sequence element(s) conserved among 12 *Drosophilids* (dubbed CS)

 CS element(s) conserved beyond *Drosophilidae*

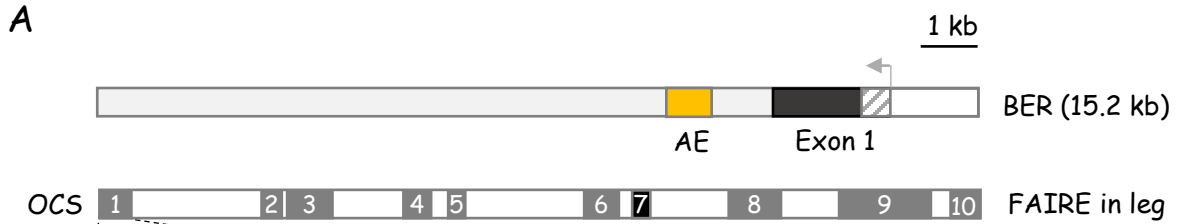

**B** Leg/Eye-antenna/Wing/Haltere CS2 within OCS1

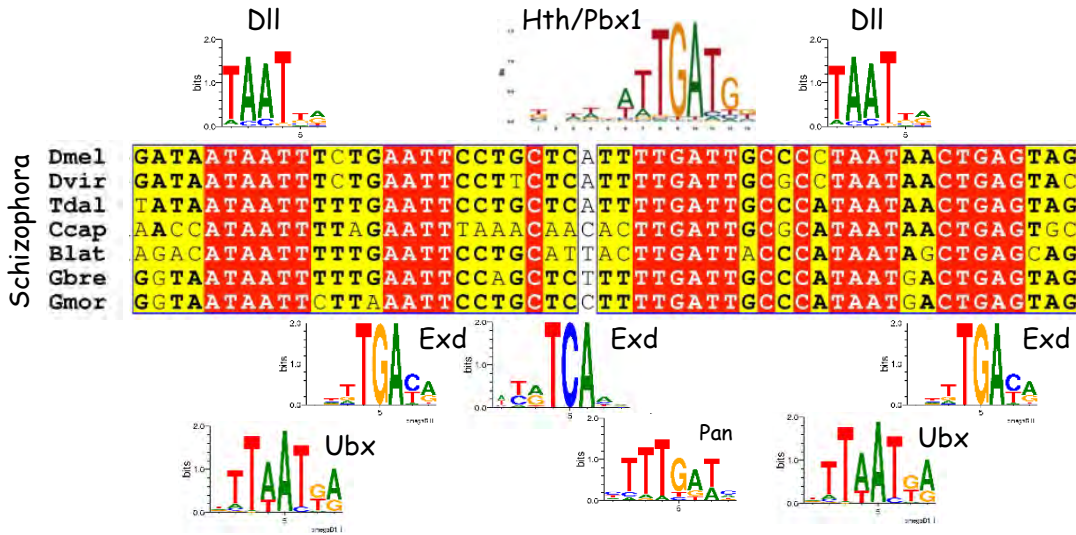

Leg-specific CS4 within OCS1

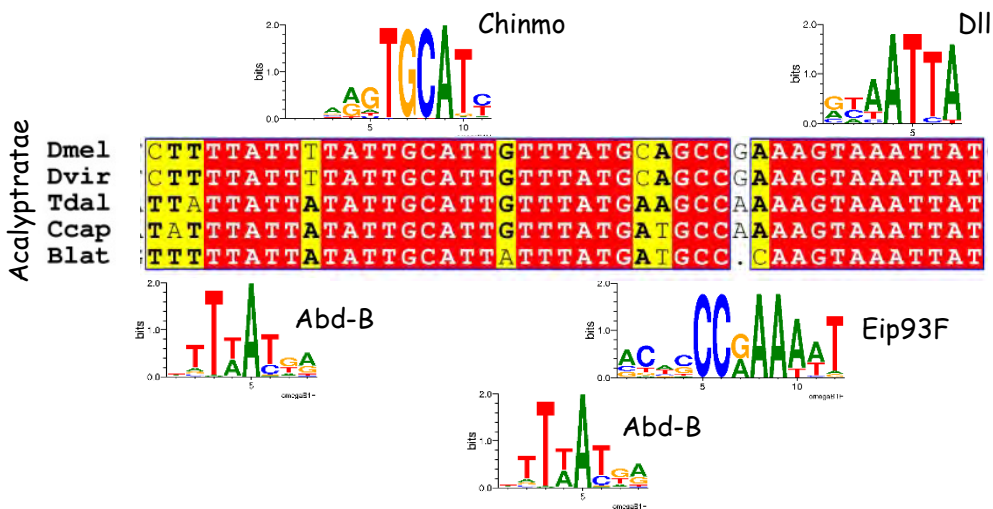

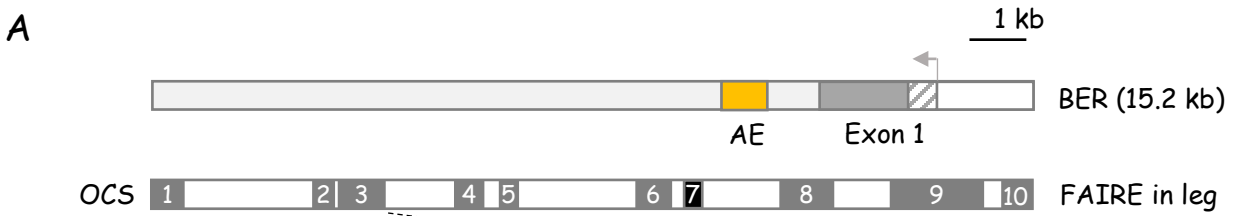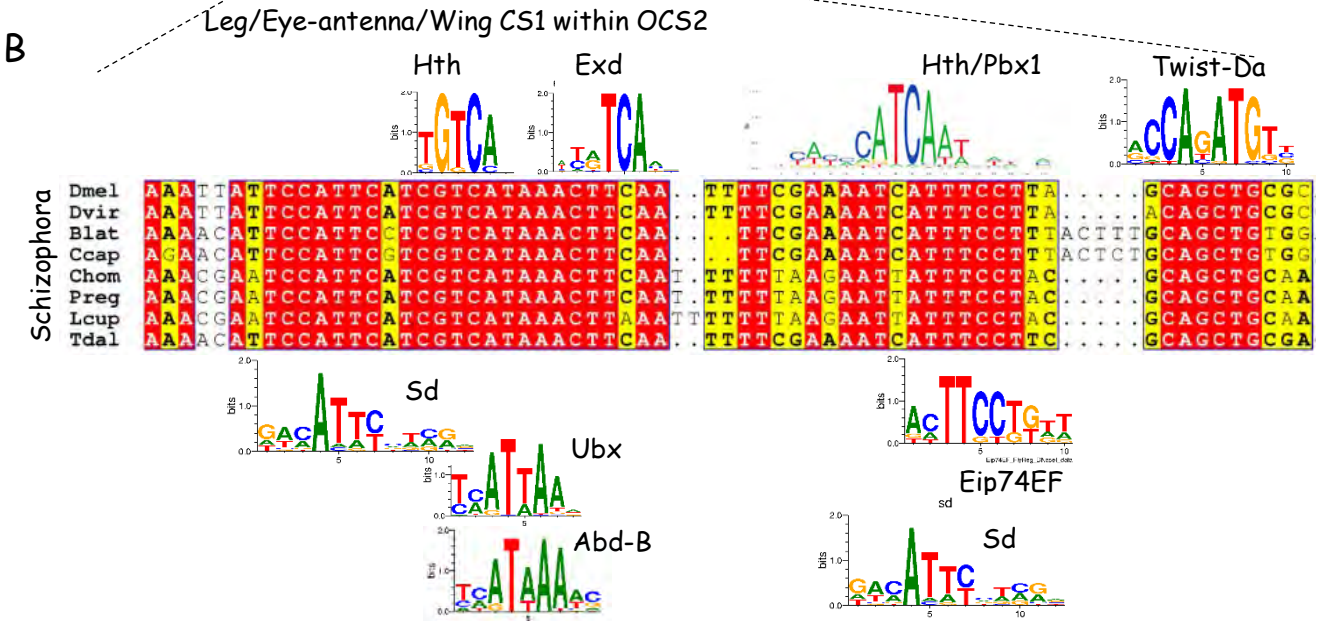

Leg/Eye-antenna/Wing/Haltere CS1 within OCS3

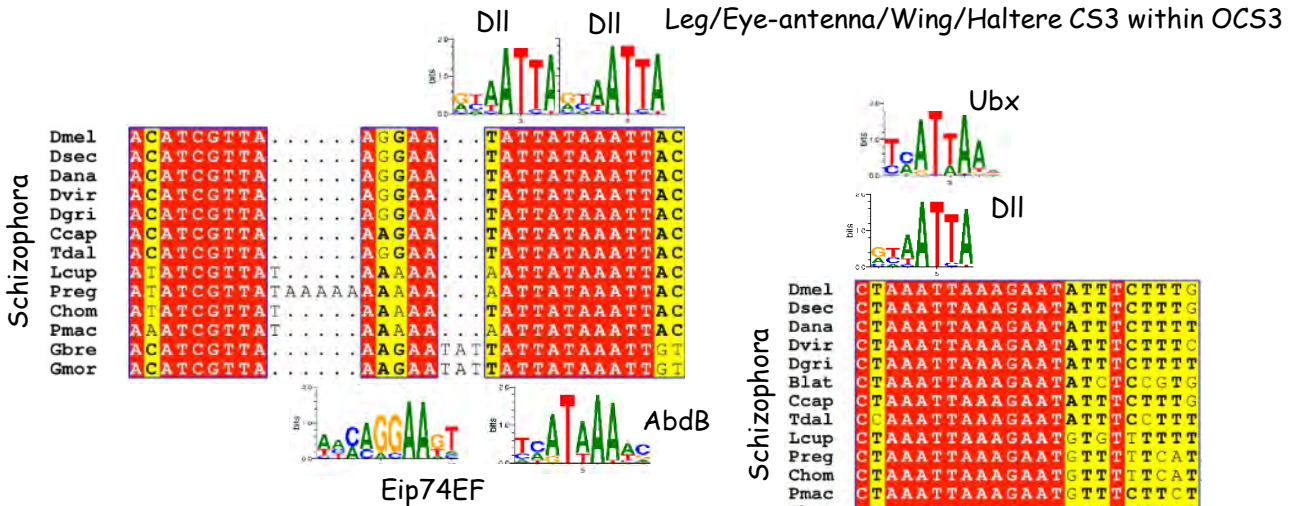

Leg/Eye-antenna/Wing/Haltere CS2 within OCS3

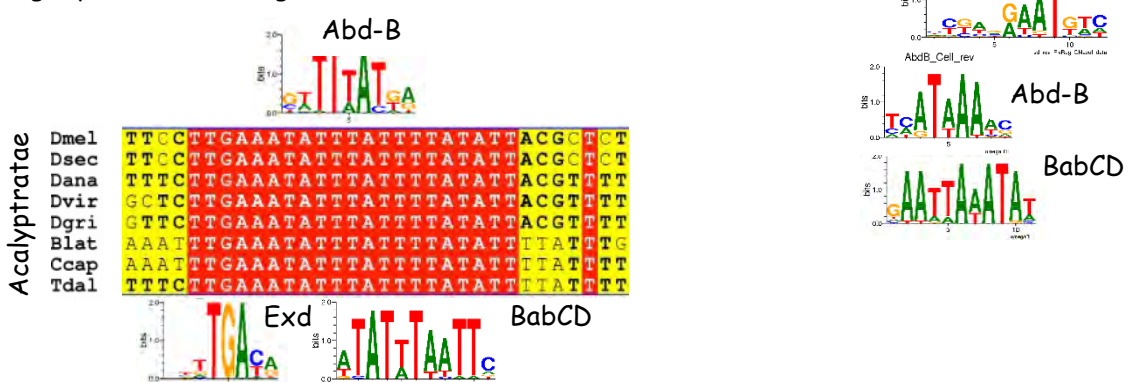

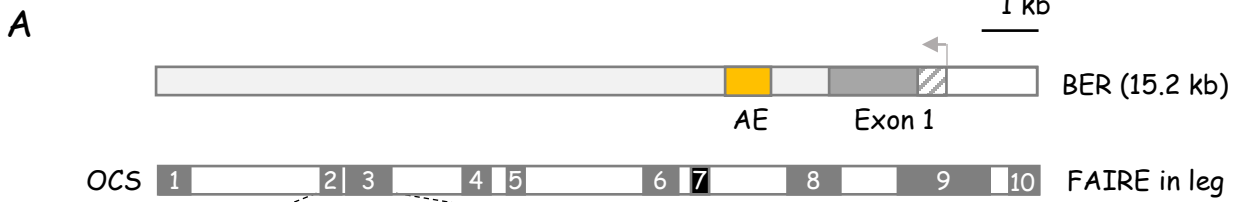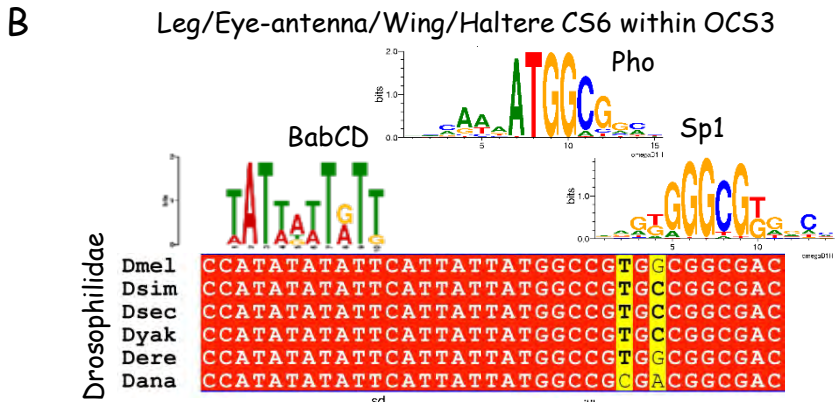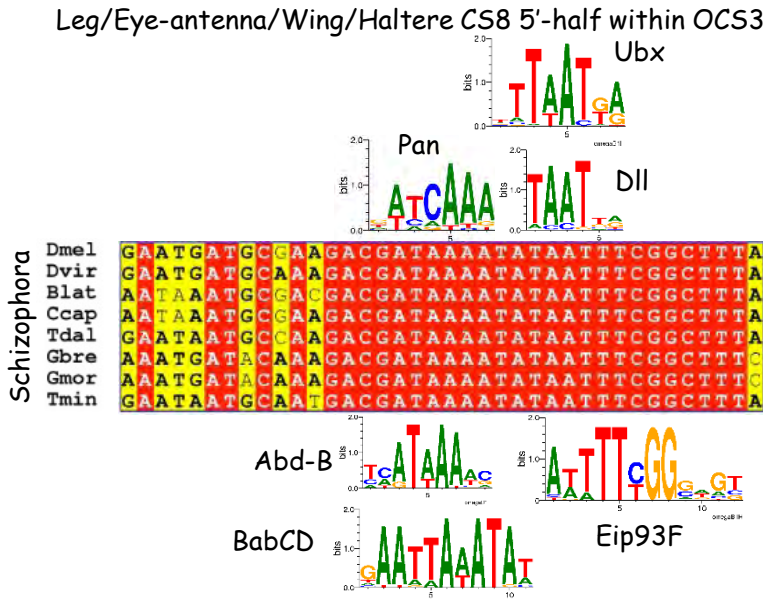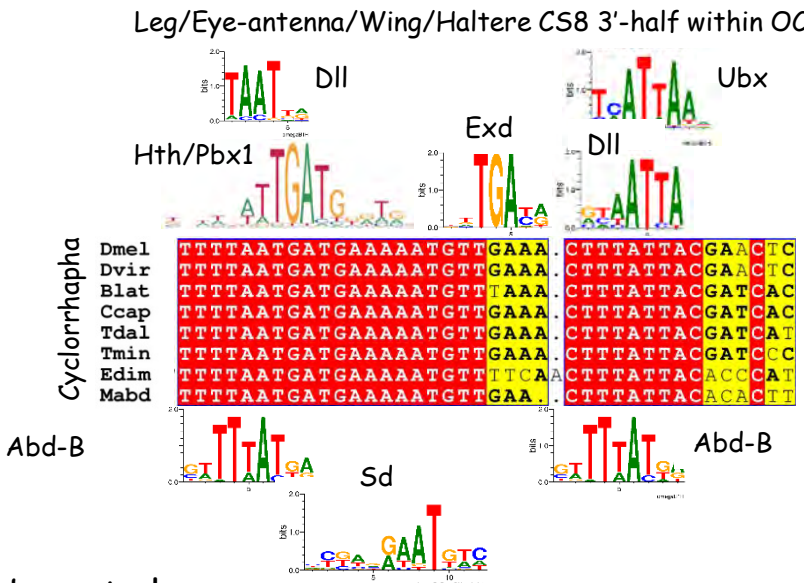

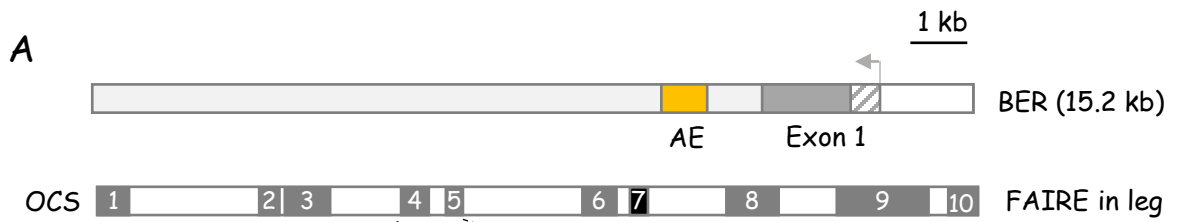

**B** Leg/Eye-antenna/Wing/Haltere CS1 within OCS4

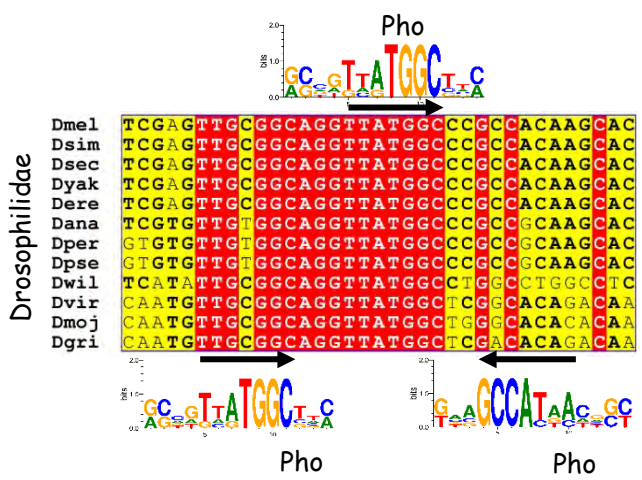

Leg/Eye-antenna/Wing CS1 within OCS5

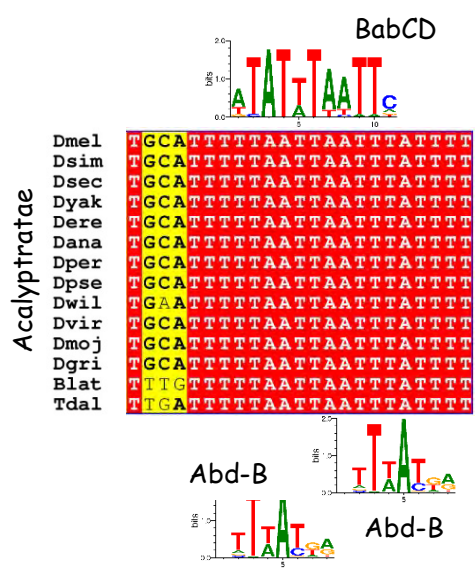

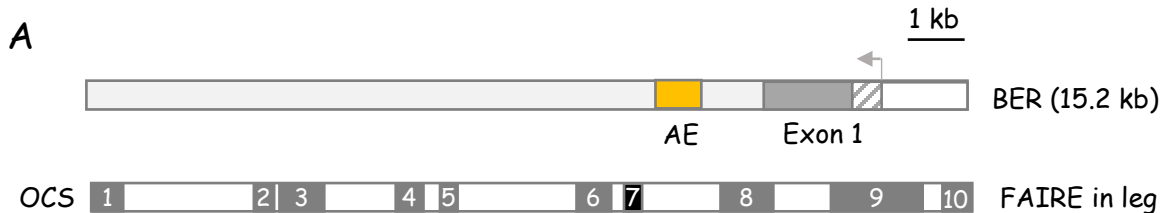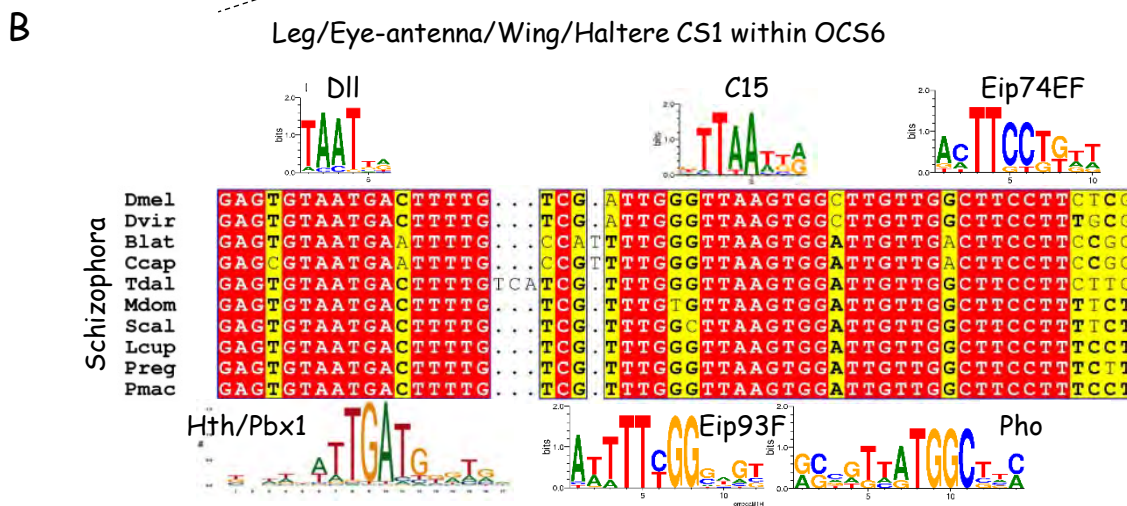

Leg/Eye-antenna/Wing/Haltere 3' next-to-CS1 within OCS6

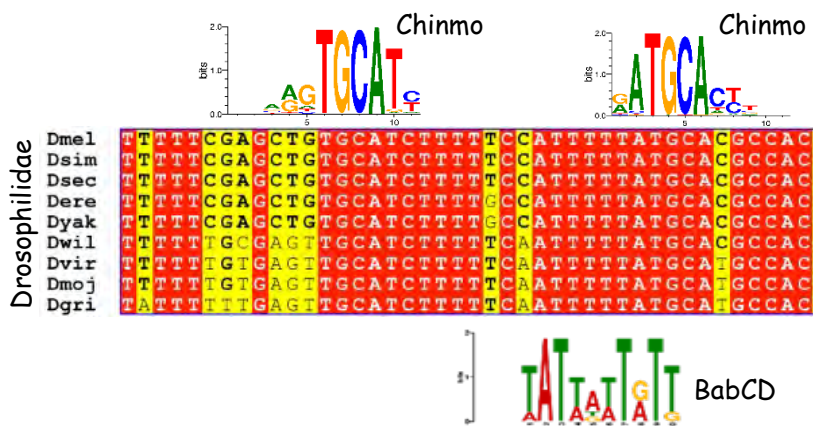

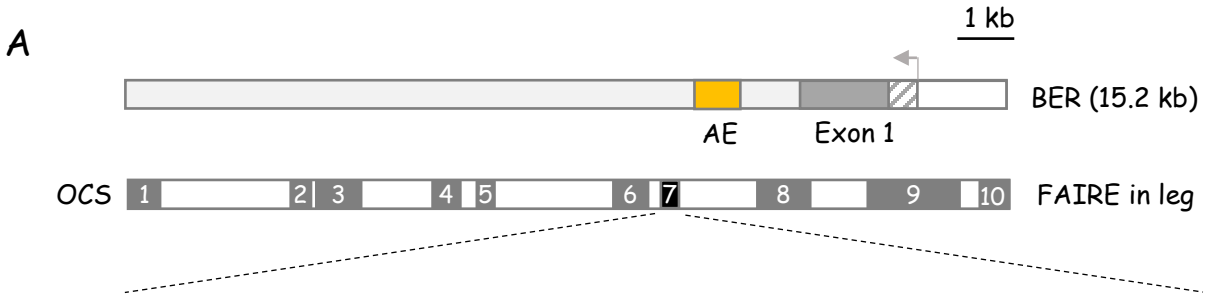

**B** Leg and eye-antenna-specific CS4 within OCS7

Leg and eye-antenna-specific CS5 within OCS7

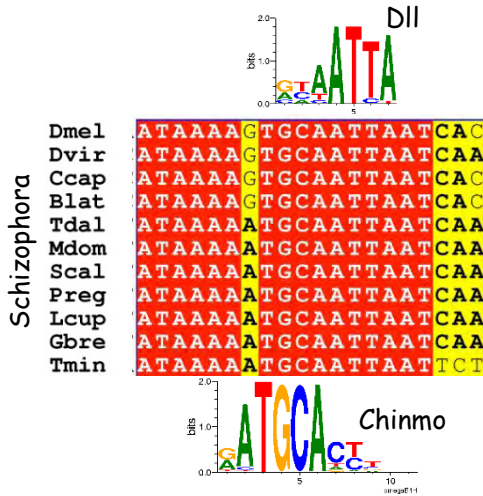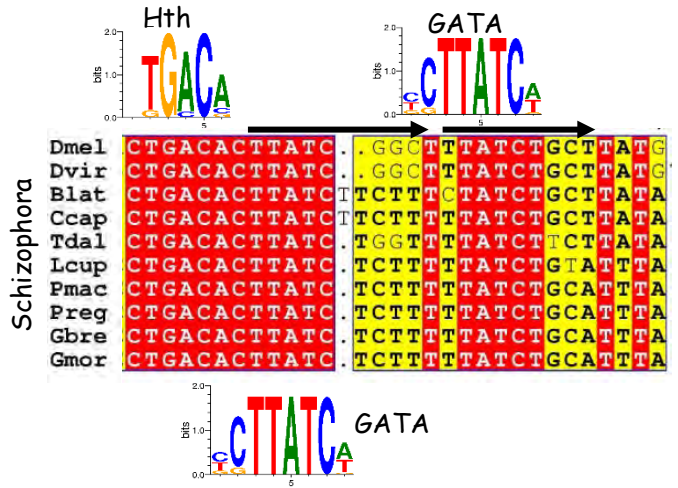

Eye-antenna-specific CS1 within OCS7

Eye-antenna-specific CS2 within OCS7

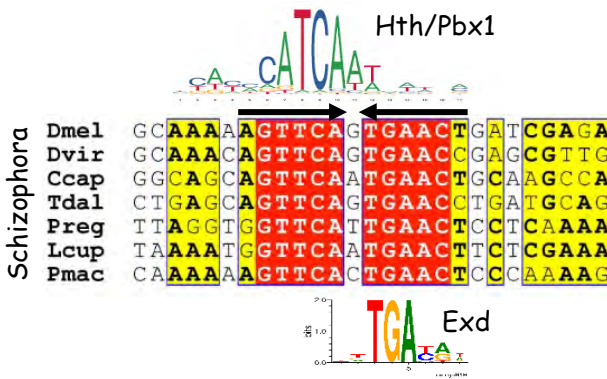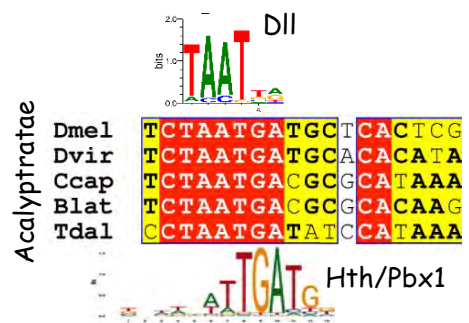

Eye-antenna-specific CS6 within OCS7

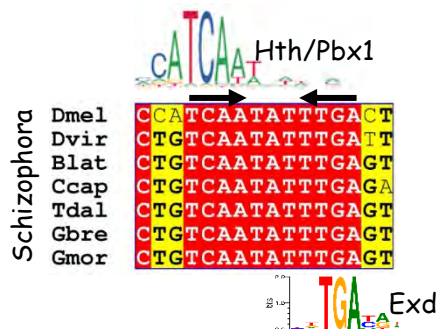





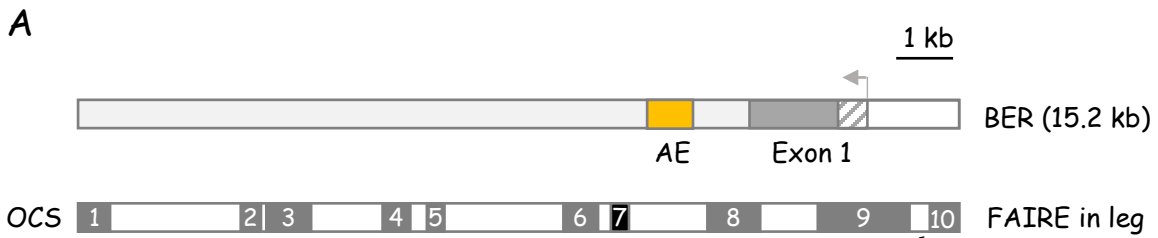

**B**

Leg/Eye-antenna/Wing/Haltere CS1 within OCS10

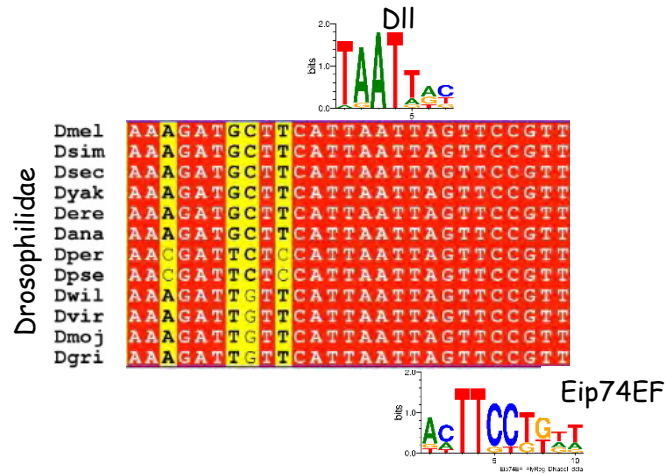

Leg/Eye-antenna/Wing/Haltere CS3 within OCS10

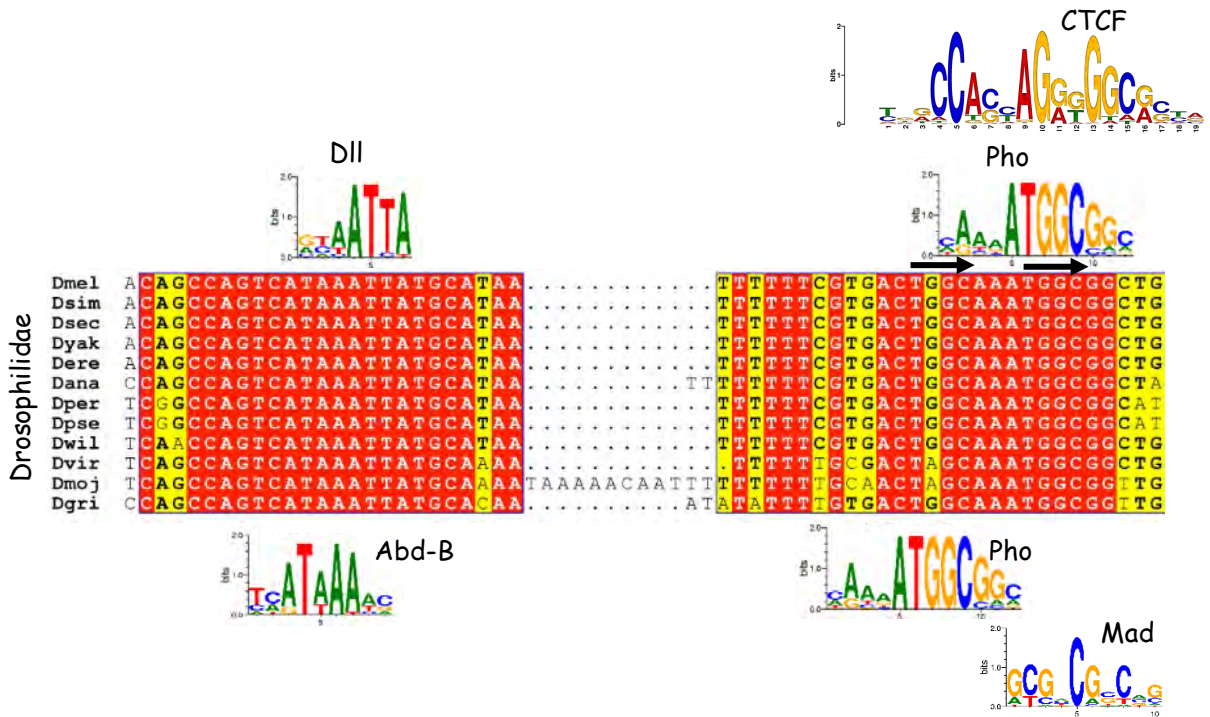

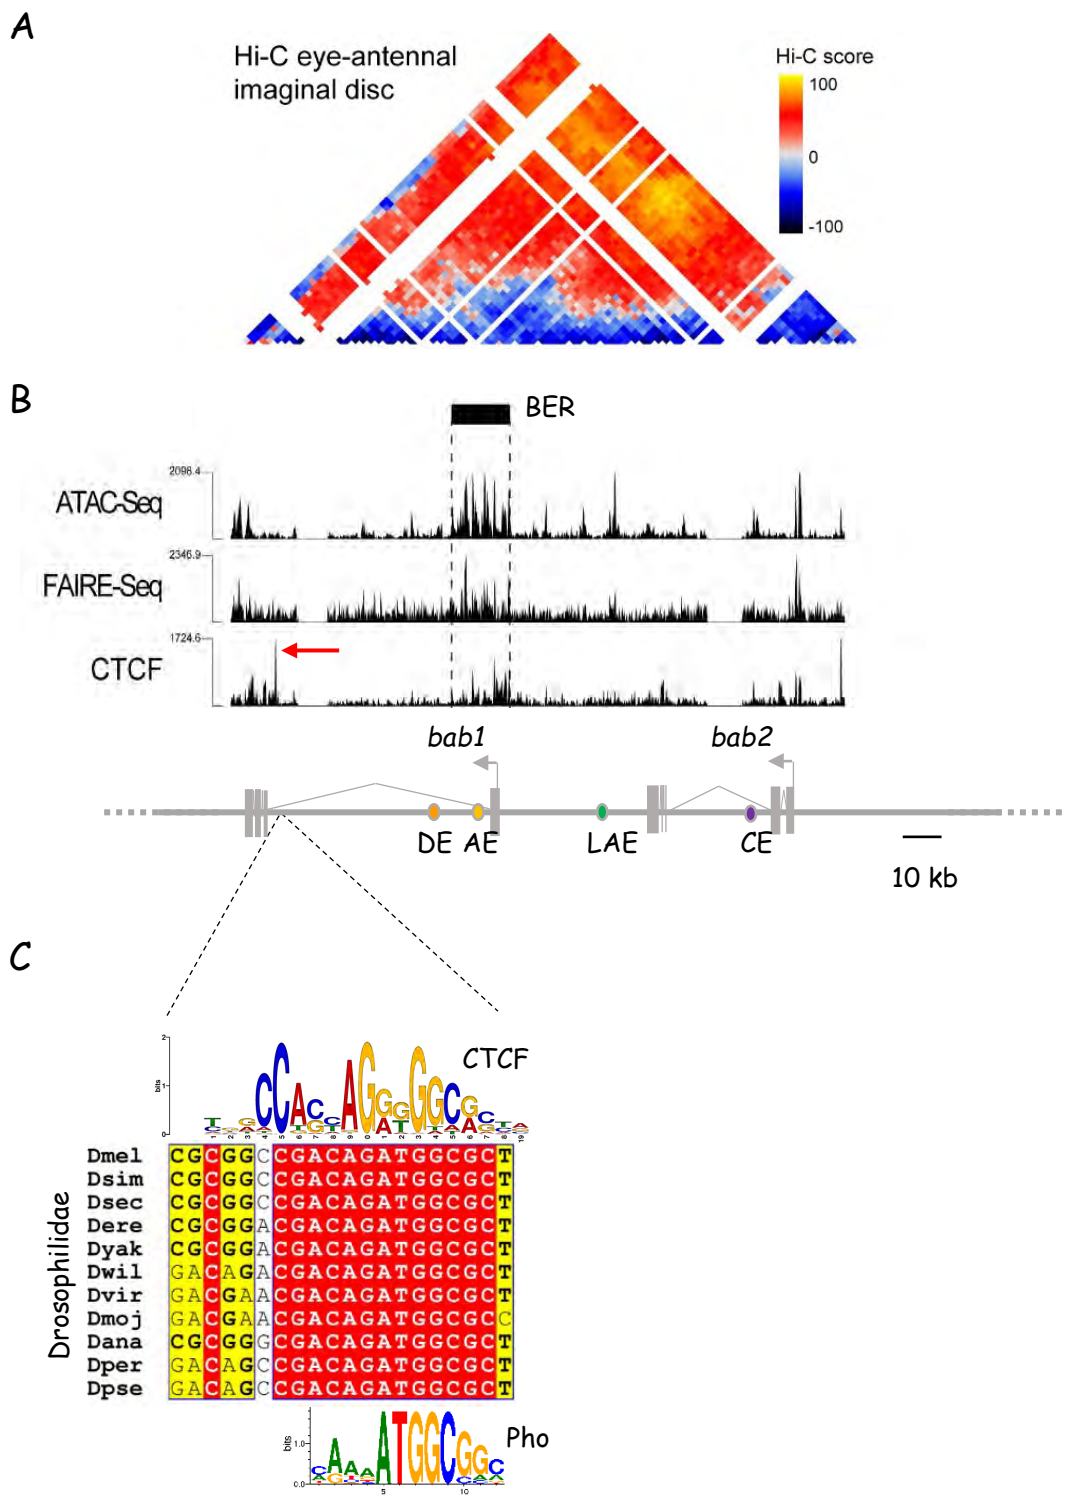

## Supplementary data

|                                                                                                                                                                                                                                                                                                                                                                                                                                               |             |
|-----------------------------------------------------------------------------------------------------------------------------------------------------------------------------------------------------------------------------------------------------------------------------------------------------------------------------------------------------------------------------------------------------------------------------------------------|-------------|
| Four letter abbreviations for investigated species                                                                                                                                                                                                                                                                                                                                                                                            | page 2      |
| Predicted sequences for BTB-BabCD proteins                                                                                                                                                                                                                                                                                                                                                                                                    | pages 3-20  |
| Bab1 sequence conservation among muscomorphans                                                                                                                                                                                                                                                                                                                                                                                                | pages 21-22 |
| Bab2 sequence conservation among muscomorphans                                                                                                                                                                                                                                                                                                                                                                                                | pages 23-24 |
| Sequence conservation between Bab1/2 paralogs                                                                                                                                                                                                                                                                                                                                                                                                 | pages 25-29 |
| Sequence conservation between paralogous Bab1/2 proteins among muscomorphans. The four-letter species abbreviations are as listed below (page 2). Strictly conserved amino-acid residues are indicated by white characters on a red background while partially conserved ones are in black characters on a yellow background. Locations of the strongly-conserved BTB and BabCD domains are indicated along the right side (see black lines). |             |
| BPE <sup>OCS1</sup> sequence conservation among Drosophilidae                                                                                                                                                                                                                                                                                                                                                                                 | pages 30-31 |
| BPE <sup>OCS2</sup> sequence conservation among Drosophilidae                                                                                                                                                                                                                                                                                                                                                                                 | page 32     |
| BPE <sup>OCS3</sup> sequence conservation among Drosophilidae                                                                                                                                                                                                                                                                                                                                                                                 | pages 33-34 |
| BPE <sup>OCS4</sup> sequence conservation among Drosophilidae                                                                                                                                                                                                                                                                                                                                                                                 | page 35     |
| BPE <sup>OCS5</sup> sequence conservation among Drosophilidae                                                                                                                                                                                                                                                                                                                                                                                 | page 36     |
| BPE <sup>OCS6</sup> sequence conservation among Drosophilidae                                                                                                                                                                                                                                                                                                                                                                                 | pages 37-38 |
| BPE <sup>OCS7</sup> sequence conservation among Drosophilidae                                                                                                                                                                                                                                                                                                                                                                                 | pages 39-40 |
| BPE <sup>OCS8</sup> sequence conservation among Drosophilidae                                                                                                                                                                                                                                                                                                                                                                                 | pages 41-42 |
| BPE <sup>OCS9</sup> sequence conservation among Drosophilidae                                                                                                                                                                                                                                                                                                                                                                                 | pages 43-45 |
| BPE <sup>OCS10</sup> sequence conservation among Drosophilidae                                                                                                                                                                                                                                                                                                                                                                                | pages 46-47 |
| Enhancer sequence conservation among Drosophilidae                                                                                                                                                                                                                                                                                                                                                                                            | pages 48-57 |

Conservation among twelve reference drosophilids of *D. melanogaster* BER OCS1-10 as well as LAE, CE, AE and DE sequences. The four-letter Drosophilidae species abbreviations are as listed below (page 2). Locations of conserved sequence elements (CS) are indicated by underneath black bars. Sequence LOGOs of predicted binding sites for the Dll, Bowl, C15, Sp1, Rn, Sal/Salr, BabCD, GAF, Pho, Eip74EF, Dsx, Abd-B, Sd, Chinmo, Pan, Mad, GATA factors, Twist-Da and Lbe transcription factors are depicted above or below the alignments.

Four letter abbreviations for investigated species

|                                        |               |              |              |                          |            |
|----------------------------------------|---------------|--------------|--------------|--------------------------|------------|
| <i>Dmel: Drosophila melanogaster</i>   | Drosophilidae | Acalyptratae | Schizophora  | Muscomorpha/Cyclorrhapha | Brachycera |
| <i>Dsim: Drosophila simulans</i>       |               |              |              |                          |            |
| <i>Dsec: Drosophila sechellia</i>      |               |              |              |                          |            |
| <i>Dyak: Drosophila yakuba</i>         |               |              |              |                          |            |
| <i>Dere: Drosophila erecta</i>         |               |              |              |                          |            |
| <i>Dsuz: Drosophila suzukii</i>        |               |              |              |                          |            |
| <i>Drho: Drosophila rhopaloa</i>       |               |              |              |                          |            |
| <i>Dele: Drosophila elegans</i>        |               |              |              |                          |            |
| <i>Dbip: Drosophila bipectinata</i>    |               |              |              |                          |            |
| <i>Dana: Drosophila ananassae</i>      |               |              |              |                          |            |
| <i>Dper: Drosophila persimilis</i>     |               |              |              |                          |            |
| <i>Dpse: Drosophila pseudoobscura</i>  |               |              |              |                          |            |
| <i>Dwil: Drosophila willistoni</i>     |               |              |              |                          |            |
| <i>Dvir: Drosophila virilis</i>        |               |              |              |                          |            |
| <i>Dmoj: Drosophila mojavensis</i>     |               |              |              |                          |            |
| <i>Dgri: Drosophila grimshawi</i>      | Calyptratae   | Aschiza      | Orthorrhapha |                          |            |
| <i>Tmin: Themira minor</i>             |               |              |              |                          |            |
| <i>Tdal: Teleopsis dalmanni</i>        |               |              |              |                          |            |
| <i>Blat: Bactrocera latifrons</i>      |               |              |              |                          |            |
| <i>Ccap : Ceratitis capitata</i>       |               |              |              |                          |            |
| <i>Mdom: Musca domestica</i>           |               |              |              |                          |            |
| <i>Scal: Stomoxys calcitrans</i>       |               |              |              |                          |            |
| <i>Lcup: Lucilia cuprina</i>           |               |              |              |                          |            |
| <i>Preg: Phormia regina</i>            |               |              |              |                          |            |
| <i>Chom: Cochliomyia hominivorax</i>   |               |              |              |                          |            |
| <i>Pmac: Paykullia maculata</i>        |               |              |              |                          |            |
| <i>Gbre: Glossina brevipalpis</i>      |               |              |              |                          |            |
| <i>Gmor: Glossina morsitans</i>        |               |              |              |                          |            |
| <i>Edim: Eristalis dimidiata</i>       |               |              |              |                          |            |
| <i>Mabd: Megaselia abdita</i>          |               |              |              | Nematocera               |            |
| <i>Cpat: Condylostylus patibulatus</i> |               |              |              |                          |            |
| <i>Cmol: Chrysotimus molliculus</i>    |               |              |              |                          |            |
| <i>Pcoq: Proctacanthus coquilletti</i> |               |              |              |                          |            |
| <i>Ddia: Dasyopogon diadema</i>        |               |              |              |                          |            |
| <i>Hfus: Holcocephala fusca</i>        |               |              |              |                          |            |
| <i>Hill: Hermetia illucens</i>         |               |              |              |                          |            |
| <i>Bval: Beris vallata</i>             |               |              |              |                          |            |
| <i>Mdes: Mayetiola destructor</i>      |               |              |              |                          |            |
| <i>Cfus: Coboldia fuscipes</i>         |               |              |              |                          |            |
| <i>Ppat: Phlebotomus papatasi</i>      |               |              |              |                          |            |
| <i>Llon: Lutzomyia longipalpis</i>     |               |              |              |                          |            |
| <i>Agam: Anopheles gambiae</i>         |               |              |              |                          |            |
| <i>Aaeg: Aedes aegypti</i>             |               |              |              |                          |            |
| <i>Dpul: Daphnia pulex</i>             | Crustacea     |              |              |                          |            |





# Bab2 sequence conservation among muscomorphans (Part1)

|        |     |                                                                                                                               |
|--------|-----|-------------------------------------------------------------------------------------------------------------------------------|
| Dmel12 | 1   | MDMTKQIVDFEIK..SE.....LIGE.....IDQFEASDYTMAPP.....EELPKMVESEPOLGHLSDNRRKYSFEREVEPTLQDPSEVV..DMQ.....                          |
| Dspe2  | 1   | MDMTKQIVDFEIK..SE.....LIGE.....IDQFEASDYTMAPP.....EELPKMVESEPOLGHLSDNRRKYSFEREVEPTLQDPSEVV..DMQ.....                          |
| Dvir12 | 1   | MDMTKQIVDFEIK..SE.....LIGE.....IDQFEASDYTMAPP.....EELPKMVESEPOLGHLSDNRRKYSFEREVEPTLQDPSEVV..DMQ.....                          |
| Bla12  | 1   | MDMTKQIVDFEIK..SE.....LIGE.....IDQFEASDYTMAPP.....EELPKMVESEPOLGHLSDNRRKYSFEREVEPTLQDPSEVV..DMQ.....                          |
| Ccap2  | 1   | MDMTKQIVDFEIK..SE.....LIGE.....IDQFEASDYTMAPP.....EELPKMVESEPOLGHLSDNRRKYSFEREVEPTLQDPSEVV..DMQ.....                          |
| Tmin2  | 1   | MDMTKQIVDFEIK..SE.....LIGE.....IDQFEASDYTMAPP.....EELPKMVESEPOLGHLSDNRRKYSFEREVEPTLQDPSEVV..DMQ.....                          |
| Tdal12 | 1   | MDMTKQIVDFEIK..SE.....LIGE.....IDQFEASDYTMAPP.....EELPKMVESEPOLGHLSDNRRKYSFEREVEPTLQDPSEVV..DMQ.....                          |
| Mdom2  | 1   | MDMTKQIVDFEIK..SE.....LIGE.....IDQFEASDYTMAPP.....EELPKMVESEPOLGHLSDNRRKYSFEREVEPTLQDPSEVV..DMQ.....                          |
| Scal12 | 1   | MDMTKQIVDFEIK..SE.....LIGE.....IDQFEASDYTMAPP.....EELPKMVESEPOLGHLSDNRRKYSFEREVEPTLQDPSEVV..DMQ.....                          |
| Lcup12 | 1   | MDMTKQIVDFEIK..SE.....LIGE.....IDQFEASDYTMAPP.....EELPKMVESEPOLGHLSDNRRKYSFEREVEPTLQDPSEVV..DMQ.....                          |
| Preg2  | 1   | MDMTKQIVDFEIK..SE.....LIGE.....IDQFEASDYTMAPP.....EELPKMVESEPOLGHLSDNRRKYSFEREVEPTLQDPSEVV..DMQ.....                          |
| Chom2  | 1   | MDMTKQIVDFEIK..SE.....LIGE.....IDQFEASDYTMAPP.....EELPKMVESEPOLGHLSDNRRKYSFEREVEPTLQDPSEVV..DMQ.....                          |
| Fmac2  | 1   | MDMTKQIVDFEIK..SE.....LIGE.....IDQFEASDYTMAPP.....EELPKMVESEPOLGHLSDNRRKYSFEREVEPTLQDPSEVV..DMQ.....                          |
| Gbre2  | 1   | MDMTKQIVDFEIK..SE.....LIGE.....IDQFEASDYTMAPP.....EELPKMVESEPOLGHLSDNRRKYSFEREVEPTLQDPSEVV..DMQ.....                          |
| Gmo2   | 1   | MDMTKQIVDFEIK..SE.....LIGE.....IDQFEASDYTMAPP.....EELPKMVESEPOLGHLSDNRRKYSFEREVEPTLQDPSEVV..DMQ.....                          |
| Mequ2  | 1   | MDMTKQIVDFEIK..SE.....LIGE.....IDQFEASDYTMAPP.....EELPKMVESEPOLGHLSDNRRKYSFEREVEPTLQDPSEVV..DMQ.....                          |
| Edim2  | 1   | MDMTKQIVDFEIK..SE.....LIGE.....IDQFEASDYTMAPP.....EELPKMVESEPOLGHLSDNRRKYSFEREVEPTLQDPSEVV..DMQ.....                          |
| Mabd2  | 1   | MDMTKQIVDFEIK..SE.....LIGE.....IDQFEASDYTMAPP.....EELPKMVESEPOLGHLSDNRRKYSFEREVEPTLQDPSEVV..DMQ.....                          |
| Dmel12 | 77  | KDIESVGEVGSFPEKVDVETELVKSKAS.....PMNDQALFPPRPLTSSSEVVGIRDP..EHLRRLRMC..LEAKKRSRSPVSGPQPFIN.....                               |
| Dspe2  | 66  | ATGPATEKAAADLDEADEEAEKPKON.....LTKDPLPPLPRPLTSSSEVVGIRDP..EHLRRLRMC..LEAKKRSRSPVSGPQPFIN.....                                 |
| Dvir12 | 64  | SAEQOQOARAELEVKLEKQEKPTFS.....VLRHEPLPPLPRPLTSSSEVVGIRDP..EHLRRLRMC..LEAKKRSRSPVSGPQPFIN.....                                 |
| Bla12  | 76  | NTAHAQAQLEQHKSTQANWHEPFAH..ETANEM.SVDRKSTETAINRATVQ..AIMSGDLSYVIVT..ASFPFAQPTOFFEADIDGMTSFPNSCLGSGPSTPN                       |
| Ccap2  | 89  | GAEOCQOQTRPLETQOADAAYOQPRE..ELNDTVAVEDEIKAIASQPPKIVGAAVVSGDLPPLPRPLTSSSEVVGIRDP..EHLRRLRMC..LEAKKRSRSPVSGPQPFIN.....          |
| Tmin2  | 108 | TLCKADNNTSLALAQTSPK.....PFOQOAVDVPDGLDLECA.....KYVGDMMMPPLPRPLTSSSEVVGIRDP..EHLRRLRMC..LEAKKRSRSPVSGPQPFIN.....               |
| Tdal12 | 67  | TGGAANNTSVALENTAF.VRPEKSLPTDLMKTFGN.....ITAGLDLPPPLPRPLTSSSEVVGIRDP..EHLRRLRMC..LEAKKRSRSPVSGPQPFIN.....                      |
| Gmo2   | 72  | ALGSENEHNAEFAEKMPAQIQKPTTFLQIENHTAN.VSIIK.....PAMGRDIPPLPRPLTSSSEVVGIRDP..EHLRRLRMC..LEAKKRSRSPVSGPQPFIN.....                 |
| Scal12 | 55  | MOQEKNFNEIPLIKMPLVEQKPTTFLQIENHTAN.VSIIK.....PAMGRDIPPLPRPLTSSSEVVGIRDP..EHLRRLRMC..LEAKKRSRSPVSGPQPFIN.....                  |
| Lcup12 | 51  | ALGSENEHNAEFAEKMPAQIQKPTTFLQIENHTAN.VSIIK.....PAMGRDIPPLPRPLTSSSEVVGIRDP..EHLRRLRMC..LEAKKRSRSPVSGPQPFIN.....                 |
| Preg2  | 56  | ATNTIQEHSNRIEMKIPPERKQKPTTFLQIENHTAN.VSIIK.....PAMGRDIPPLPRPLTSSSEVVGIRDP..EHLRRLRMC..LEAKKRSRSPVSGPQPFIN.....                |
| Chom2  | 59  | ATNTIQEHSNRIEMKIPPERKQKPTTFLQIENHTAN.VSIIK.....PAMGRDIPPLPRPLTSSSEVVGIRDP..EHLRRLRMC..LEAKKRSRSPVSGPQPFIN.....                |
| Fmac2  | 54  | ITETAYNVEKVNKISAQIQKPTTFLQIENHTAN.VSIIK.....PAMGRDIPPLPRPLTSSSEVVGIRDP..EHLRRLRMC..LEAKKRSRSPVSGPQPFIN.....                   |
| Gbre2  | 47  | FVAPAGVLSRKTTHWEKVRNPFELLENMDK..SIIK.....AANTCDLPPPLPRPLTSSSEVVGIRDP..EHLRRLRMC..LEAKKRSRSPVSGPQPFIN.....                     |
| Gmo2   | 47  | FVAPAGVLSRKTTHWEKVRNPFELLENMDK..SIIK.....AANTCDLPPPLPRPLTSSSEVVGIRDP..EHLRRLRMC..LEAKKRSRSPVSGPQPFIN.....                     |
| Mequ2  | 8   | .....FSESEIFPL.KSLLS.....FASIGDLPPLPRPLTSSSEVVGIRDP..EHLRRLRMC..LEAKKRSRSPVSGPQPFIN.....                                      |
| Edim2  | 8   | .....FSESEIFPL.KSLLS.....FASIGDLPPLPRPLTSSSEVVGIRDP..EHLRRLRMC..LEAKKRSRSPVSGPQPFIN.....                                      |
| Mabd2  | 7   | .....FSESEIFPL.KSLLS.....FASIGDLPPLPRPLTSSSEVVGIRDP..EHLRRLRMC..LEAKKRSRSPVSGPQPFIN.....                                      |
| Dmel12 | 154 | .....HLA.....GSALEFFGQRSS.....FVE.....TKIKTNKTPPR.....RKIV.....FVSG.....ECQOFCRLRNN                                           |
| Dspe2  | 143 | .....HLA.....GSALEFFGQRSS.....FVE.....TKIKTNKTPPR.....RKIV.....FVSG.....ECQOFCRLRNN                                           |
| Dvir12 | 141 | .....HLA.....GSALEFFGQRSS.....FVE.....TKIKTNKTPPR.....RKIV.....FVSG.....ECQOFCRLRNN                                           |
| Bla12  | 185 | .....HLA.....GSALEFFGQRSS.....FVE.....TKIKTNKTPPR.....RKIV.....FVSG.....ECQOFCRLRNN                                           |
| Ccap2  | 200 | .....HLA.....GSALEFFGQRSS.....FVE.....TKIKTNKTPPR.....RKIV.....FVSG.....ECQOFCRLRNN                                           |
| Tmin2  | 201 | .....HLA.....GSALEFFGQRSS.....FVE.....TKIKTNKTPPR.....RKIV.....FVSG.....ECQOFCRLRNN                                           |
| Tdal12 | 205 | .....HLA.....GSALEFFGQRSS.....FVE.....TKIKTNKTPPR.....RKIV.....FVSG.....ECQOFCRLRNN                                           |
| Mdom2  | 167 | .....HLA.....GSALEFFGQRSS.....FVE.....TKIKTNKTPPR.....RKIV.....FVSG.....ECQOFCRLRNN                                           |
| Lcup12 | 145 | .....HLA.....GSALEFFGQRSS.....FVE.....TKIKTNKTPPR.....RKIV.....FVSG.....ECQOFCRLRNN                                           |
| Preg2  | 150 | .....HLA.....GSALEFFGQRSS.....FVE.....TKIKTNKTPPR.....RKIV.....FVSG.....ECQOFCRLRNN                                           |
| Chom2  | 152 | .....HLA.....GSALEFFGQRSS.....FVE.....TKIKTNKTPPR.....RKIV.....FVSG.....ECQOFCRLRNN                                           |
| Fmac2  | 148 | .....HLA.....GSALEFFGQRSS.....FVE.....TKIKTNKTPPR.....RKIV.....FVSG.....ECQOFCRLRNN                                           |
| Gbre2  | 140 | .....HLA.....GSALEFFGQRSS.....FVE.....TKIKTNKTPPR.....RKIV.....FVSG.....ECQOFCRLRNN                                           |
| Gmo2   | 140 | .....HLA.....GSALEFFGQRSS.....FVE.....TKIKTNKTPPR.....RKIV.....FVSG.....ECQOFCRLRNN                                           |
| Mequ2  | 64  | .....HLA.....GSALEFFGQRSS.....FVE.....TKIKTNKTPPR.....RKIV.....FVSG.....ECQOFCRLRNN                                           |
| Edim2  | 64  | .....HLA.....GSALEFFGQRSS.....FVE.....TKIKTNKTPPR.....RKIV.....FVSG.....ECQOFCRLRNN                                           |
| Mabd2  | 44  | .....HLA.....GSALEFFGQRSS.....FVE.....TKIKTNKTPPR.....RKIV.....FVSG.....ECQOFCRLRNN                                           |
| Dmel12 | 205 | YQNLNINVFDDLLQNSSEVVDVTAACGGH...IKAKRMVLSACSPYPQAFDNDPCQHPH...IMRDVRS...DKALVEMFYKGEINVCDDQ...NPLKVAET...KIRGLAEVSAAGRGE...GG |
| Dspe2  | 204 | YQNLNINVFDDLLQNSSEVVDVTAACGGH...IKAKRMVLSACSPYPQAFDNDPCQHPH...IMRDVRS...DKALVEMFYKGEINVCDDQ...NPLKVAET...KIRGLAEVSAAGRGE...DC |
| Dvir12 | 263 | YQNLNINVFDDLLQNSSEVVDVTAACGGH...IKAKRMVLSACSPYPQAFDNDPCQHPH...IMRDVRS...DKALVEMFYKGEINVCDDQ...NPLKVAET...KIRGLAEVSAAGRGE...GM |
| Bla12  | 203 | YQNLNINVFDDLLQNSSEVVDVTAACGGH...IKAKRMVLSACSPYPQAFDNDPCQHPH...IMRDVRS...DKALVEMFYKGEINVCDDQ...NPLKVAET...KIRGLAEVSAAGRGE...GM |
| Ccap2  | 290 | YQNLNINVFDDLLQNSSEVVDVTAACGGH...IKAKRMVLSACSPYPQAFDNDPCQHPH...IMRDVRS...DKALVEMFYKGEINVCDDQ...NPLKVAET...KIRGLAEVSAAGRGE...GM |
| Tmin2  | 285 | YQNLNINVFDDLLQNSSEVVDVTAACGGH...IKAKRMVLSACSPYPQAFDNDPCQHPH...IMRDVRS...DKALVEMFYKGEINVCDDQ...NPLKVAET...KIRGLAEVSAAGRGE...GT |
| Tdal12 | 214 | YQNLNINVFDDLLQNSSEVVDVTAACGGH...IKAKRMVLSACSPYPQAFDNDPCQHPH...IMRDVRS...DKALVEMFYKGEINVCDDQ...NPLKVAET...KIRGLAEVSAAGRGE...GT |
| Mdom2  | 230 | YQNLNINVFDDLLQNSSEVVDVTAACGGH...IKAKRMVLSACSPYPQAFDNDPCQHPH...IMRDVRS...DKALVEMFYKGEINVCDDQ...NPLKVAET...KIRGLAEVSAAGRGE...GT |
| Scal12 | 227 | YQNLNINVFDDLLQNSSEVVDVTAACGGH...IKAKRMVLSACSPYPQAFDNDPCQHPH...IMRDVRS...DKALVEMFYKGEINVCDDQ...NPLKVAET...KIRGLAEVSAAGRGE...GT |
| Lcup12 | 199 | YQNLNINVFDDLLQNSSEVVDVTAACGGH...IKAKRMVLSACSPYPQAFDNDPCQHPH...IMRDVRS...DKALVEMFYKGEINVCDDQ...NPLKVAET...KIRGLAEVSAAGRGE...GT |
| Lcup2  | 204 | YQNLNINVFDDLLQNSSEVVDVTAACGGH...IKAKRMVLSACSPYPQAFDNDPCQHPH...IMRDVRS...DKALVEMFYKGEINVCDDQ...NPLKVAET...KIRGLAEVSAAGRGE...GT |
| Chom2  | 206 | YQNLNINVFDDLLQNSSEVVDVTAACGGH...IKAKRMVLSACSPYPQAFDNDPCQHPH...IMRDVRS...DKALVEMFYKGEINVCDDQ...NPLKVAET...KIRGLAEVSAAGRGE...GT |
| Fmac2  | 202 | YQNLNINVFDDLLQNSSEVVDVTAACGGH...IKAKRMVLSACSPYPQAFDNDPCQHPH...IMRDVRS...DKALVEMFYKGEINVCDDQ...NPLKVAET...KIRGLAEVSAAGRGE...GT |
| Gbre2  | 193 | YQNLNINVFDDLLQNSSEVVDVTAACGGH...IKAKRMVLSACSPYPQAFDNDPCQHPH...IMRDVRS...DKALVEMFYKGEINVCDDQ...NPLKVAET...KIRGLAEVSAAGRGE...GT |
| Gmo2   | 128 | YQNLNINVFDDLLQNSSEVVDVTAACGGH...IKAKRMVLSACSPYPQAFDNDPCQHPH...IMRDVRS...DKALVEMFYKGEINVCDDQ...NPLKVAET...KIRGLAEVSAAGRGE...GT |
| Mequ2  | 126 | YQNLNINVFDDLLQNSSEVVDVTAACGGH...IKAKRMVLSACSPYPQAFDNDPCQHPH...IMRDVRS...DKALVEMFYKGEINVCDDQ...NPLKVAET...KIRGLAEVSAAGRGE...GT |
| Edim2  | 128 | YQNLNINVFDDLLQNSSEVVDVTAACGGH...IKAKRMVLSACSPYPQAFDNDPCQHPH...IMRDVRS...DKALVEMFYKGEINVCDDQ...NPLKVAET...KIRGLAEVSAAGRGE...GT |
| Mabd2  | 82  | YQNLNINVFDDLLQNSSEVVDVTAACGGH...IKAKRMVLSACSPYPQAFDNDPCQHPH...IMRDVRS...DKALVEMFYKGEINVCDDQ...NPLKVAET...KIRGLAEVSAAGRGE...GT |
| Dmel12 | 318 | AS.....ALP.....MSAFDDEDEEELASATAIQOD..GDAD.....PDEEMKARPLRLP.....EGV.....LDLN.....QRKRKRSDGYSATPSPSPL.....R                   |
| Dspe2  | 317 | AS.....ALP.....MSAFDDEDEEELASATAIQOD..GDAD.....PDEEMKARPLRLP.....EGV.....LDLN.....QRKRKRSDGYSATPSPSPL.....R                   |
| Dvir12 | 313 | AS.....ALP.....MSAFDDEDEEELASATAIQOD..GDAD.....PDEEMKARPLRLP.....EGV.....LDLN.....QRKRKRSDGYSATPSPSPL.....R                   |
| Bla12  | 376 | AA.....PMMQCRMTIFDEEDVSDDD.....TESA.....EDGCGHPRKRLAKT.....RAGDSA.....LDLN.....QRKRKRSDGYSATPSPSPL.....R                      |
| Ccap2  | 408 | AA.....PMMQCRMTIFDEEDVSDDD.....TESA.....EDGCGHPRKRLAKT.....RAGDSA.....LDLN.....QRKRKRSDGYSATPSPSPL.....R                      |
| Tmin2  | 394 | GT.....GHTLVFPERMTIVYDDEPESSEDDA.....DNDDIGLMDGFGHFKPRLYERNFVIAAAA.AAA.AAAVRSANRKRKRSDGYSATPSPSPL.....R                       |
| Tdal12 | 325 | VA.....AHMPLPERMTIVYDDEPESSEDDA.....DNDDIGLMDGFGHFKPRLYERNFVIAAAA.AAA.AAAVRSANRKRKRSDGYSATPSPSPL.....R                        |
| Mdom2  | 341 | VA.....AHMPLPERMTIVYDDEPESSEDDA.....DNDDIGLMDGFGHFKPRLYERNFVIAAAA.AAA.AAAVRSANRKRKRSDGYSATPSPSPL.....R                        |
| Scal12 | 342 | VA.....AHMPLPERMTIVYDDEPESSEDDA.....DNDDIGLMDGFGHFKPRLYERNFVIAAAA.AAA.AAAVRSANRKRKRSDGYSATPSPSPL.....R                        |
| Lcup12 | 310 | MA.....AQLPLPERMTIVYDDEPESSEDDA.....DNDDIGLMDGFGHFKPRLYERNFVIAAAA.AAA.AAAVRSANRKRKRSDGYSATPSPSPL.....R                        |
| Lcup2  | 315 | MA.....AQLPLPERMTIVYDDEPESSEDDA.....DNDDIGLMDGFGHFKPRLYERNFVIAAAA.AAA.AAAVRSANRKRKRSDGYSATPSPSPL.....R                        |
| Preg2  | 310 | MA.....AQLPLPERMTIVYDDEPESSEDDA.....DNDDIGLMDGFGHFKPRLYERNFVIAAAA.AAA.AAAVRSANRKRKRSDGYSATPSPSPL.....R                        |
| Chom2  | 317 | MA.....AQLPLPERMTIVYDDEPESSEDDA.....DNDDIGLMDGFGHFKPRLYERNFVIAAAA.AAA.AAAVRSANRKRKRSDGYSATPSPSPL.....R                        |
| Fmac2  | 313 | MA.....AQLPLPERMTIVYDDEPESSEDDA.....DNDDIGLMDGFGHFKPRLYERNFVIAAAA.AAA.AAAVRSANRKRKRSDGYSATPSPSPL.....R                        |
| Gbre2  | 304 | MA.....AQLPLPERMTIVYDDEPESSEDDA.....DNDDIGLMDGFGHFKPRLYERNFVIAAAA.AAA.AAAVRSANRKRKRSDGYSATPSPSPL.....R                        |
| Gmo2   | 241 | MA.....AQLPLPERMTIVYDDEPESSEDDA.....DNDDIGLMDGFGHFKPRLYERNFVIAAAA.AAA.AAAVRSANRKRKRSDGYSATPSPSPL.....R                        |
| Mequ2  | 204 | MA.....AQLPLPERMTIVYDDEPESSEDDA.....DNDDIGLMDGFGHFKPRLYERNFVIAAAA.AAA.AAAVRSANRKRKRSDGYSATPSPSPL.....R                        |
| Edim2  | 239 | MA.....AQLPLPERMTIVYDDEPESSEDDA.....DNDDIGLMDGFGHFKPRLYERNFVIAAAA.AAA.AAAVRSANRKRKRSDGYSATPSPSPL.....R                        |
| Mabd2  | 195 | MA.....AQLPLPERMTIVYDDEPESSEDDA.....DNDDIGLMDGFGHFKPRLYERNFVIAAAA.AAA.AAAVRSANRKRKRSDGYSATPSPSPL.....R                        |
| Dmel12 | 390 | QGRS.....EISERGSSGT.....PQSQSOSQ...LAMI...TSIVRN...FASFPFO.....TLEGR.....                                                     |
| Dspe2  | 394 | QGRS.....EISERGSSGT.....PQSQSOSQ...LAMI...TSIVRN...FASFPFO.....TLEGR.....                                                     |
| Dvir12 | 390 | QGRS.....EISERGSSGT.....PQSQSOSQ...LAMI...TSIVRN...FASFPFO.....TLEGR.....                                                     |
| Bla12  | 459 | GANASNO..PTIESASPKNQTTNAITDEISGADVSGAQPQVAVIT...TSIVRN...FASFPFO.....TLEGR.....                                               |
| Ccap2  | 485 | GIFTEH..TAGONATMSQVATAT..NGTADTASQPPVAVIT...TSIVRN...FASFPFO.....TLEGR.....                                                   |
| Tmin2  | 490 | YGNRA..YSPASPERAAE..ASDNMPEPPLALASTIVRN...FASFPFO.....TLEGR.....                                                              |
| Tdal12 | 417 | SRSH..PLPRTTEKQHNAAAEE..NAPANDAASNTNAMI...TSIVRN...FASFPFO.....TLEGR.....                                                     |
| Mdom2  | 433 | NTRNLGLDLSGQLKDKESC.....GFSSPAPNGGII...TSIVRN...FASFPFO.....TLEGR.....                                                        |
| Scal12 | 436 | SRRS.....RSPQRDKFAE.....AASINPVMAT...TSIVRN...FASFPFO.....TLEGR.....                                                          |
| Lcup12 | 395 | SRRS.....RSPQRDKFAE.....AASINPVMAT...TSIVRN...FASFPFO.....TLEGR.....                                                          |
| Preg2  | 402 | SRRS.....RSPQRDKFAE.....AASINPVMAT...TSIVRN...FASFPFO.....TLEGR.....                                                          |
| Chom2  | 404 | SRRS.....RSPQRDKFAE.....AASINPVMAT...TSIVRN...FASFPFO.....TLEGR.....                                                          |
| Fmac2  | 403 | SRRS.....RSPQRDKFAE.....AASINPVMAT...TSIVRN...FASFPFO.....TLEGR.....                                                          |
| Gbre2  | 393 | DYRS.....ATSMFAEKNI...STTPFIVM...TSIVRN...FASFPFO.....TLEGR.....                                                              |
| Gmo2   | 393 | DYRS.....ATSMFAEKNI...STTPFIVM...TSIVRN...FASFPFO.....TLEGR.....                                                              |
| Mequ2  | 312 | QOQQOQH.QOQQOQQOQQOQHLYOQR..QSLPQCP..TFPMSSSVRN...FASFPFO.....TLEGR.....                                                      |
| Edim2  | 310 | QOQQOQH.QOQQOQQOQQOQHLYOQR..QSLPQCP..TFPMSSSVRN...FASFPFO.....TLEGR.....                                                      |
| Mabd2  | 245 | FMRLT.LGSSHSPIEN.....YQDR.....QQLPQCP..TFPMSSSVRN...FASFPFO.....TLEGR.....                                                    |
| Dmel12 | 437 | .....NSAMNAVQRKS.....PAP.....TATGSHNGN.....SGAAHSDP...GGVA.....VQALPFPHM.AAIV.....                                            |
| Dspe2  | 466 | .....SSSAAS..SSAGATYRT.AARCSPPPHQHQHGHHPGGSGNS.....AGALHSDP...GGVGS.....GGQSSLPFPHM.AAIVAA.....                               |
| Dvir12 | 470 | .....SSSMGSSGSAAYRS.CSAPFPFPP.....PAHISNG.....SRAALHSDP...GGVGS.....GGQSSLPFPHM.AAIVAA.....                                   |
| Bla12  | 548 | .....SARLSTATASVRS.PM.....ESANS.....LKGAAHSDP...GGVGS.....GGQSSLPFPHM.AAIVAA.....                                             |
| Ccap2  | 571 | ITPHGSSATPTDPTISHATAHSYRF.....PDM.....ESANS.....LKGAAHSDP...GGVGS.....GGQSSLPFPHM.AAIVAA.....                                 |
| Tmin2  | 587 | SAV..SMGFSSTASNTPSASGSIYR..QVCCPEL.....TAAEITVAAPPEPFAQSQQPMIPSAVLSLGGSSPDSNNS.....AGHLSVHSH.....                             |
| Tdal12 | 501 | .....SAAYRF..TVCSEBFL.....FS.AHG.....NSAQ...MDNGIT.....NSANHSVHSHAAAAAA.....                                                  |
| Mdom2  | 518 | .....SARLSTATASVRS.PM.....ESANS.....LKGAAHSDP...GGVGS.....GGQSSLPFPHM.AAIVAA.....                                             |
| Scal12 | 509 | .....AAAAASPNVVALPYRS.LERSCSPPM.....MTPPCA.R.....AQSSVSN.....TSPSLASPNSSSAGP.....SGTSPISHSH.AAIVAA.....                       |
| Lcup12 | 470 | .....FAAASYRA..RELSLSPSL..MT.AHFGT.....TSLASPNSSSAGP.....SGTSPISHSH.AAIVAA.....                                               |
| Preg2  | 477 | .....SAAYTYRF..RELSLSPSL..MT.SHTGT.....GHLLE...TSPST.....PQISHPFH.AAIVAA.....                                                 |
| Chom2  | 479 | .....SAAYTYRF..RELSLSPSL..MT.SHTGT.....GHLLE...TSPST.....PQISHPFH.AAIVAA.....                                                 |
| Fmac2  | 478 | .....SAAYTYRF..RELSLSPSL..MT.SHTGT.....GHLLE...TSPST.....PQISHPFH.AAIVAA.....                                                 |
| Gbre2  | 464 | .....SVTLFPRS.MTRCSLSPSL..AAAAHTR.....EVLAV...TSPST.....VHS.RSAGS.....                                                        |
| Gmo2   | 463 | .....SVTLFPRS.MTRCSLSPSL..AAAAHTR.....EVLAV...TSPST.....VHS.RSAGS.....                                                        |
| Mequ2  | 396 | .....SVTLFPRS.MTRCSLSPSL..AAAAHTR.....EVLAV...TSPST.....VHS.RSAGS.....                                                        |
| Edim2  | 365 | .....AGGGGACGSSGSGS.....VRLNLPSP.....ITGGP...TSPST.....VHS.RSAGS.....                                                         |
| Mabd2  | 311 | .....AGGGGACGSSGSGS.....VRLNLPSP.....ITGGP...TSPST.....VHS.RSAGS.....                                                         |

BTB















# BER<sup>OCS1</sup> sequence conservation among Drosophilidae (Part1)

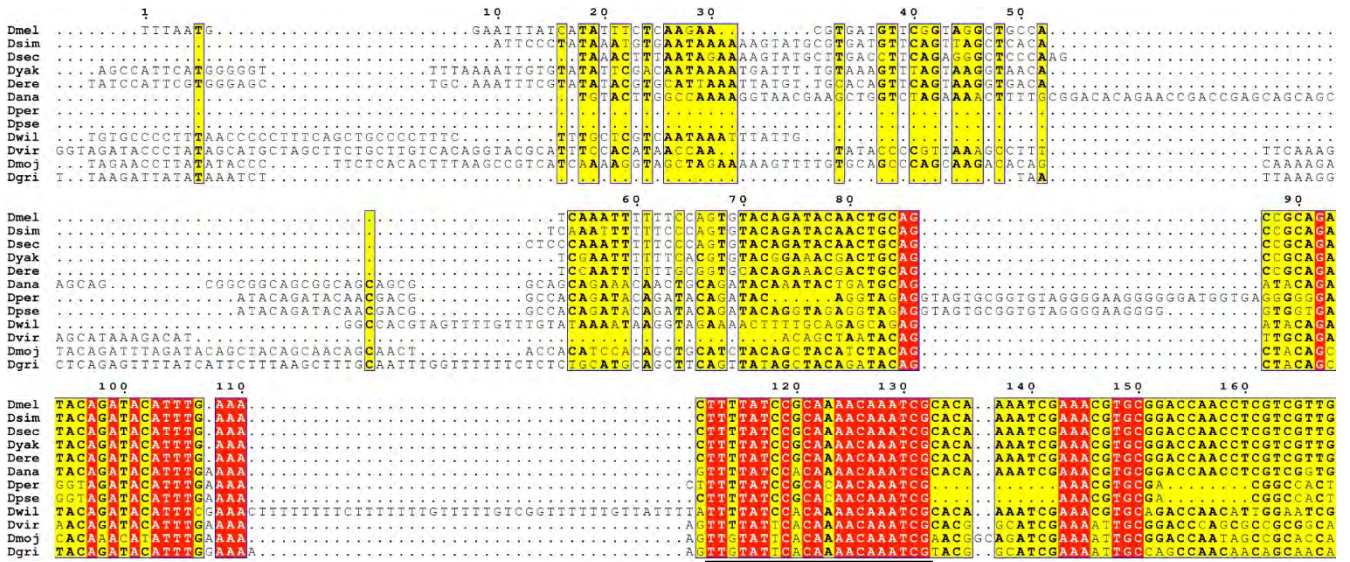

## CS1

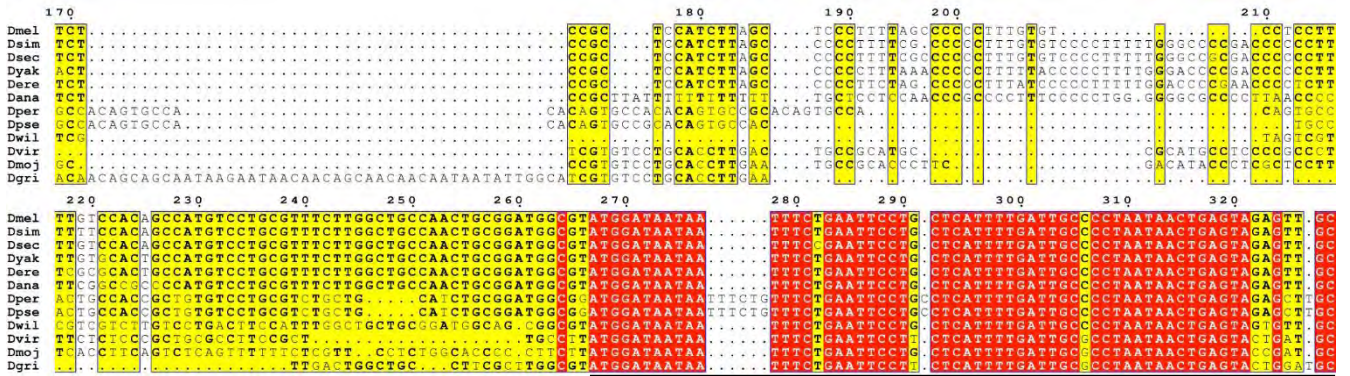

## Spl

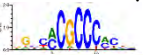

## CS2

## Mad

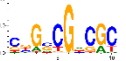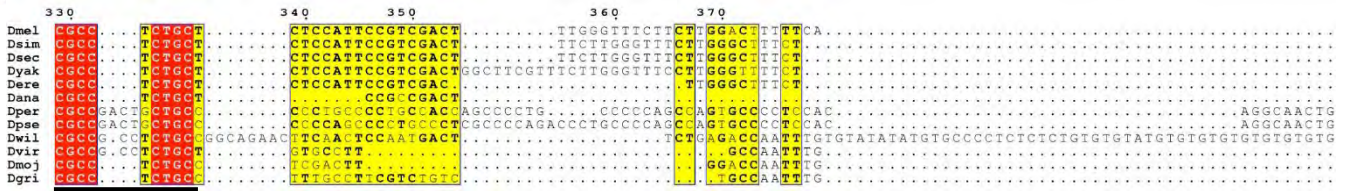

# BER<sup>OCS1</sup> sequence conservation among Drosophilidae (Part2)

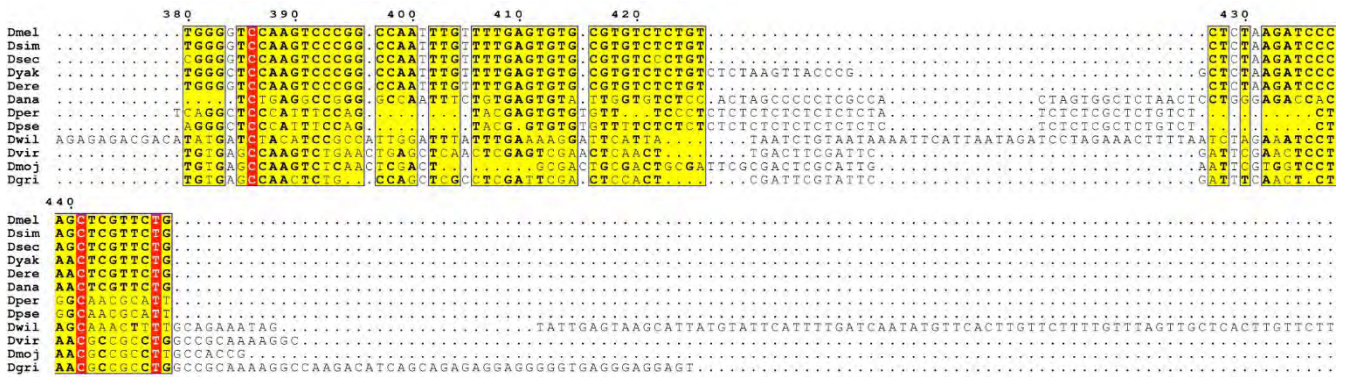

## BabCD

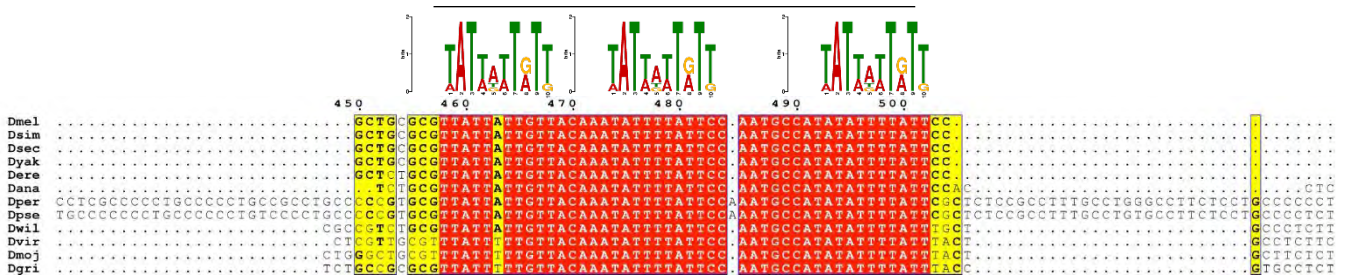

## Leg-specific CS3

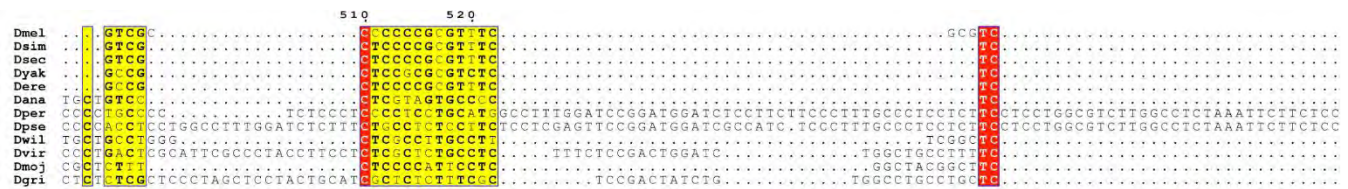

## Leg-specific CS4

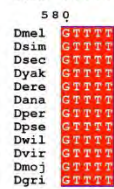



# BER<sup>OCS2</sup> sequence conservation among Drosophilidae

|      | 1                     | 10                  | 20        | 30                  | 40   | 50 |
|------|-----------------------|---------------------|-----------|---------------------|------|----|
| Dmel | .....                 | CGGGAGCAATATAA      | GGCAATAAA | TACAAAAATTATCCATTCA | CGTC |    |
| Dsim | .....                 | GGGAGCAGATATAA      | GGCAATAAA | TACAAAAATTATCCATTCA | CGTC |    |
| Dsec | .....                 | GGGAGCAGATATAA      | GGCAATAAA | TACAAAAATTATCCATTCA | CGTC |    |
| Dyak | .....                 | GGGAGCAGATATAA      | GGCAATAAA | TACAAAAATTATCCATTCA | CGTC |    |
| Dere | .....                 | GGGAGCAGATATAA      | GGCAATAAA | TACAAAAATTATCCATTCA | CGTC |    |
| Dana | .....                 | GTGGGAACAGATAACATAA | GGCAATAAA | TACAAAAATTATCCATTCA | CGTC |    |
| Dper | CACACAAAGCAGC         | CGCAATAAA           | GGCAATAAA | TACAAAAATTATCCATTCA | CGTC |    |
| Dspe | CACACAAAGCAGC         | CGCAATAAA           | GGCAATAAA | TACAAAAATTATCCATTCA | CGTC |    |
| Dwil | TACATACATATATAAGTATGG | GGCAGATATAA         | GGCAATAAA | TACAAAAATTATCCATTCA | CGTC |    |
| Dvir | CACACTCCGACT          | CGCAATAAA           | GGCAATAAA | TACAAAAATTATCCATTCA | CGTC |    |
| Dmoj | AACAT                 | CGCAATAAA           | GGCAATAAA | TACAAAAATTATCCATTCA | CGTC |    |
| Dgri | CACACACACACT          | CGCAATAAA           | GGCAATAAA | TACAAAAATTATCCATTCA | CGTC |    |

|      | 60                                                    | 70 | 80 | 90 | 100 |
|------|-------------------------------------------------------|----|----|----|-----|
| Dmel | ATAAACTTCAATTTTCGAAAAATCATTTCCTTAGCAGCTGCGCATTAAAAAAA |    |    |    |     |
| Dsim | ATAAACTTCAATTTTCGAAAAATCATTTCCTTAGCAGCTGCGCATTAAAAAAA |    |    |    |     |
| Dsec | ATAAACTTCAATTTTCGAAAAATCATTTCCTTAGCAGCTGCGCATTAAAAAAA |    |    |    |     |
| Dyak | ATAAACTTCAATTTTCGAAAAATCATTTCCTTAGCAGCTGCGCATTAAAAAAA |    |    |    |     |
| Dere | ATAAACTTCAATTTTCGAAAAATCATTTCCTTAGCAGCTGCGCATTAAAAAAA |    |    |    |     |
| Dana | ATAAACTTCAATTTTCGAAAAATCATTTCCTTAGCAGCTGCGCATTAAAAAAA |    |    |    |     |
| Dper | ATAAACTTCAATTTTCGAAAAATCATTTCCTTAGCAGCTGCGCATTAAAAAAA |    |    |    |     |
| Dspe | ATAAACTTCAATTTTCGAAAAATCATTTCCTTAGCAGCTGCGCATTAAAAAAA |    |    |    |     |
| Dwil | ATAAACTTCAATTTTCGAAAAATCATTTCCTTAGCAGCTGCGCATTAAAAAAA |    |    |    |     |
| Dvir | ATAAACTTCAATTTTCGAAAAATCATTTCCTTAGCAGCTGCGCATTAAAAAAA |    |    |    |     |
| Dmoj | ATAAACTTCAATTTTCGAAAAATCATTTCCTTAGCAGCTGCGCATTAAAAAAA |    |    |    |     |
| Dgri | ATAAACTTCAATTTTCGAAAAATCATTTCCTTAGCAGCTGCGCATTAAAAAAA |    |    |    |     |

## CS1

|      | 110                        | 120 | 130             | 140  |
|------|----------------------------|-----|-----------------|------|
| Dmel | AAACACAGAAAGCAGAAAAATAAAGA |     | ACGCCAACATAAAAA | TGNA |
| Dsim | AAACACAGAAAGCAGAAAAATAAAGA |     | ACGCCAACATAAAAA | TGNA |
| Dsec | AAACACAGAAAGCAGAAAAATAAAGA |     | ACGCCAACATAAAAA | TGNA |
| Dyak | AAACACAGAAAGCAGAAAAATAAAGA |     | ACGCCAACATAAAAA | TGNA |
| Dere | AAACACAGAAAGCAGAAAAATAAAGA |     | ACGCCAACATAAAAA | TGNA |
| Dana | AAACACAGAAAGCAGAAAAATAAAGA |     | ACGCCAACATAAAAA | TGNA |
| Dper | AAACACAGAAAGCAGAAAAATAAAGA |     | ACGCCAACATAAAAA | TGNA |
| Dspe | AAACACAGAAAGCAGAAAAATAAAGA |     | ACGCCAACATAAAAA | TGNA |
| Dwil | AAACACAGAAAGCAGAAAAATAAAGA |     | ACGCCAACATAAAAA | TGNA |
| Dvir | AAACACAGAAAGCAGAAAAATAAAGA |     | ACGCCAACATAAAAA | TGNA |
| Dmoj | AAACACAGAAAGCAGAAAAATAAAGA |     | ACGCCAACATAAAAA | TGNA |
| Dgri | AAACACAGAAAGCAGAAAAATAAAGA |     | ACGCCAACATAAAAA | TGNA |

## DII

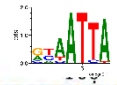

|      | 150                          | 170                     | 180 | 190 | 200 | 210 | 220                |
|------|------------------------------|-------------------------|-----|-----|-----|-----|--------------------|
| Dmel | TAAATGATTTAAGGCTCGACAGTGGGCA | TGATTTGCCCAACTGCCAGCAAT |     |     |     | C   | GAGATATCGCAATCAATA |
| Dsim | TAAATGATTTAAGGCTCGACAGTGGGCA | TGATTTGCCCAACTGCCAGCAAT |     |     |     | C   | GAGATATCGCAATCAATA |
| Dsec | TAAATGATTTAAGGCTCGACAGTGGGCA | TGATTTGCCCAACTGCCAGCAAT |     |     |     | C   | GAGATATCGCAATCAATA |
| Dyak | TAAATGATTTAAGGCTCGACAGTGGGCA | TGATTTGCCCAACTGCCAGCAAT |     |     |     | C   | GAGATATCGCAATCAATA |
| Dere | TAAATGATTTAAGGCTCGACAGTGGGCA | TGATTTGCCCAACTGCCAGCAAT |     |     |     | C   | GAGATATCGCAATCAATA |
| Dana | TAAATGATTTAAGGCTCGACAGTGGGCA | TGATTTGCCCAACTGCCAGCAAT |     |     |     | C   | GAGATATCGCAATCAATA |
| Dper | TAAATGATTTAAGGCTCGACAGTGGGCA | TGATTTGCCCAACTGCCAGCAAT |     |     |     | C   | GAGATATCGCAATCAATA |
| Dspe | TAAATGATTTAAGGCTCGACAGTGGGCA | TGATTTGCCCAACTGCCAGCAAT |     |     |     | C   | GAGATATCGCAATCAATA |
| Dwil | TAAATGATTTAAGGCTCGACAGTGGGCA | TGATTTGCCCAACTGCCAGCAAT |     |     |     | C   | GAGATATCGCAATCAATA |
| Dvir | TAAATGATTTAAGGCTCGACAGTGGGCA | TGATTTGCCCAACTGCCAGCAAT |     |     |     | C   | GAGATATCGCAATCAATA |
| Dmoj | TAAATGATTTAAGGCTCGACAGTGGGCA | TGATTTGCCCAACTGCCAGCAAT |     |     |     | C   | GAGATATCGCAATCAATA |
| Dgri | TAAATGATTTAAGGCTCGACAGTGGGCA | TGATTTGCCCAACTGCCAGCAAT |     |     |     | C   | GAGATATCGCAATCAATA |

## CS2

|      | 230   | 240                           | 250 | 260 |
|------|-------|-------------------------------|-----|-----|
| Dmel | TACCT | CACCTGCCAAAGTCATTTGTCGTGAGTAG |     |     |
| Dsim | CACCT | CACCTGCCAAAGTCATTTGTCGTGAGTAG |     |     |
| Dsec | CACCT | CACCTGCCAAAGTCATTTGTCGTGAGTAG |     |     |
| Dyak | CACCT | CACCTGCCAAAGTCATTTGTCGTGAGTAG |     |     |
| Dere | CACCT | CACCTGCCAAAGTCATTTGTCGTGAGTAG |     |     |
| Dana | CACCT | CACCTGCCAAAGTCATTTGTCGTGAGTAG |     |     |
| Dper | CACCT | CACCTGCCAAAGTCATTTGTCGTGAGTAG |     |     |
| Dspe | CACCT | CACCTGCCAAAGTCATTTGTCGTGAGTAG |     |     |
| Dwil | CACCT | CACCTGCCAAAGTCATTTGTCGTGAGTAG |     |     |
| Dvir | CACCT | CACCTGCCAAAGTCATTTGTCGTGAGTAG |     |     |
| Dmoj | CACCT | CACCTGCCAAAGTCATTTGTCGTGAGTAG |     |     |
| Dgri | CACCT | CACCTGCCAAAGTCATTTGTCGTGAGTAG |     |     |

|      | 270                    | 280                  | 290 | 300            | 310 | 320 |
|------|------------------------|----------------------|-----|----------------|-----|-----|
| Dmel | GCTGCTGATTGATGTCGATGTC | AAGCAAAGCGAAGTTGGCAA | ATA | GTCCGAGCTGCTAG |     |     |
| Dsim | GCTGCTGATTGATGTCGATGTC | AAGCAAAGCGAAGTTGGCAA | ATA | GTCCGAGCTGCTAG |     |     |
| Dsec | GCTGCTGATTGATGTCGATGTC | AAGCAAAGCGAAGTTGGCAA | ATA | GTCCGAGCTGCTAG |     |     |
| Dyak | GCTGCTGATTGATGTCGATGTC | AAGCAAAGCGAAGTTGGCAA | ATA | GTCCGAGCTGCTAG |     |     |
| Dere | GCTGCTGATTGATGTCGATGTC | AAGCAAAGCGAAGTTGGCAA | ATA | GTCCGAGCTGCTAG |     |     |
| Dana | GCTGCTGATTGATGTCGATGTC | AAGCAAAGCGAAGTTGGCAA | ATA | GTCCGAGCTGCTAG |     |     |
| Dper | GCTGCTGATTGATGTCGATGTC | AAGCAAAGCGAAGTTGGCAA | ATA | GTCCGAGCTGCTAG |     |     |
| Dspe | GCTGCTGATTGATGTCGATGTC | AAGCAAAGCGAAGTTGGCAA | ATA | GTCCGAGCTGCTAG |     |     |
| Dwil | GCTGCTGATTGATGTCGATGTC | AAGCAAAGCGAAGTTGGCAA | ATA | GTCCGAGCTGCTAG |     |     |
| Dvir | GCTGCTGATTGATGTCGATGTC | AAGCAAAGCGAAGTTGGCAA | ATA | GTCCGAGCTGCTAG |     |     |
| Dmoj | GCTGCTGATTGATGTCGATGTC | AAGCAAAGCGAAGTTGGCAA | ATA | GTCCGAGCTGCTAG |     |     |
| Dgri | GCTGCTGATTGATGTCGATGTC | AAGCAAAGCGAAGTTGGCAA | ATA | GTCCGAGCTGCTAG |     |     |

|      | 330 | 340 | 350           | 360              |
|------|-----|-----|---------------|------------------|
| Dmel | TC  | GA  | AAATGGGGGCAAA | CAAATGTTGTCAGTAG |
| Dsim | TC  | GA  | AAATGGGGGCAAA | CAAATGTTGTCAGTAG |
| Dsec | TC  | GA  | AAATGGGGGCAAA | CAAATGTTGTCAGTAG |
| Dyak | TC  | GA  | AAATGGGGGCAAA | CAAATGTTGTCAGTAG |
| Dere | TC  | GA  | AAATGGGGGCAAA | CAAATGTTGTCAGTAG |
| Dana | TC  | GA  | AAATGGGGGCAAA | CAAATGTTGTCAGTAG |
| Dper | TC  | GA  | AAATGGGGGCAAA | CAAATGTTGTCAGTAG |
| Dspe | TC  | GA  | AAATGGGGGCAAA | CAAATGTTGTCAGTAG |
| Dwil | TC  | GA  | AAATGGGGGCAAA | CAAATGTTGTCAGTAG |
| Dvir | TC  | GA  | AAATGGGGGCAAA | CAAATGTTGTCAGTAG |
| Dmoj | TC  | GA  | AAATGGGGGCAAA | CAAATGTTGTCAGTAG |
| Dgri | TC  | GA  | AAATGGGGGCAAA | CAAATGTTGTCAGTAG |





# BER<sup>OC54</sup> sequence conservation among Drosophilidae

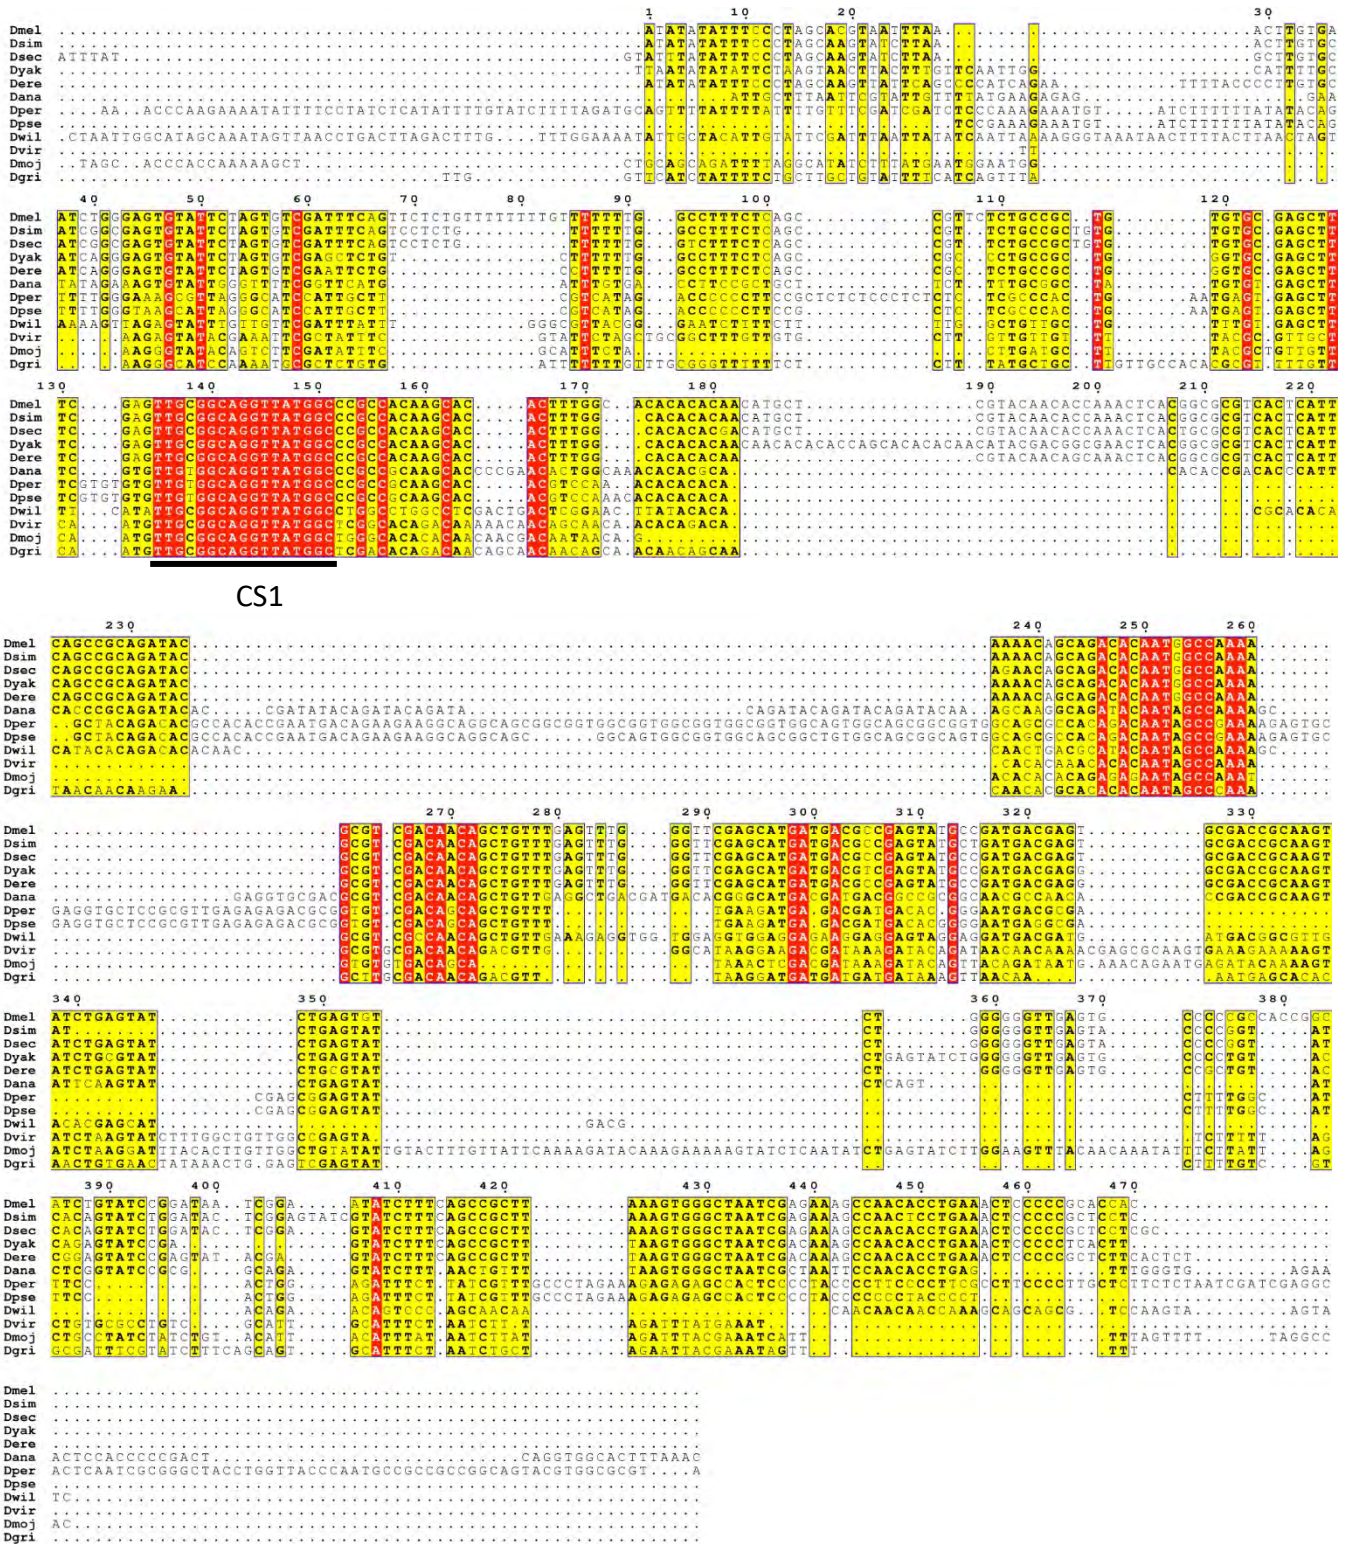

# BER<sup>OC55</sup> sequence conservation among Drosophilidae

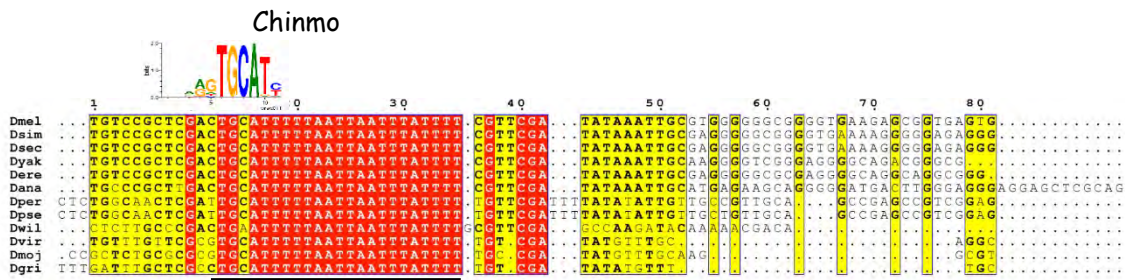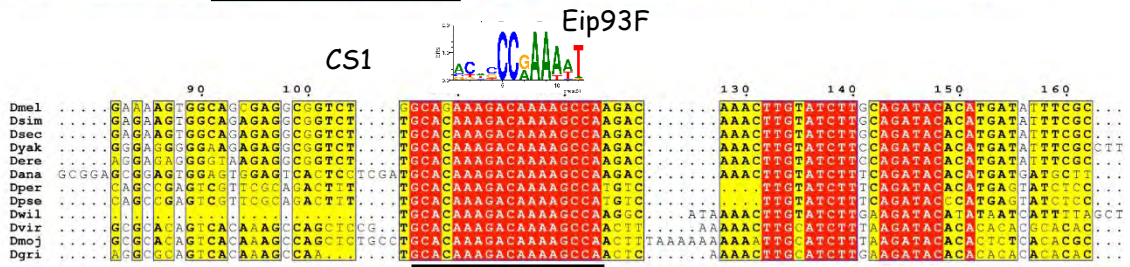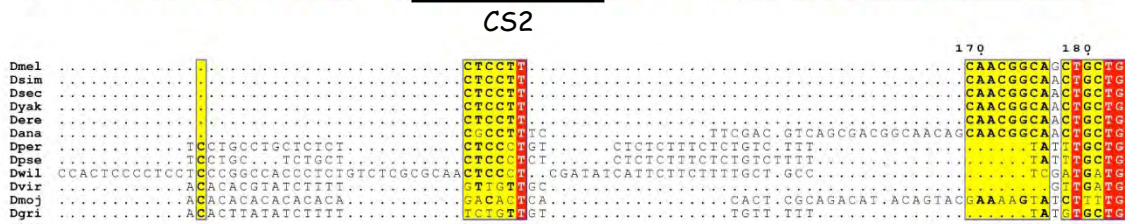

# BER<sup>OCS6</sup> sequence conservation among Drosophilidae (Part1)

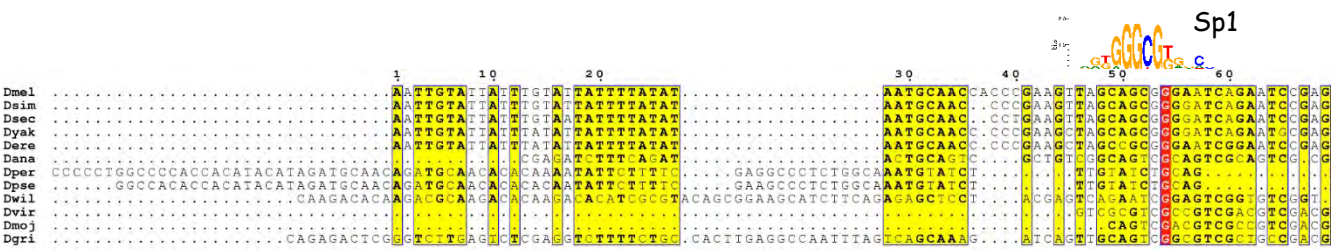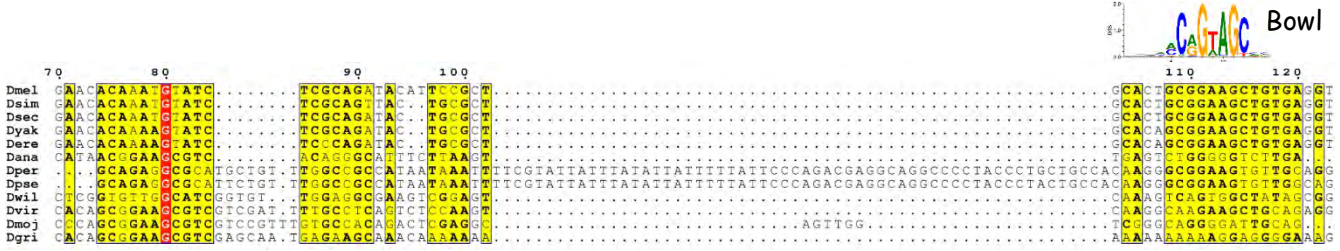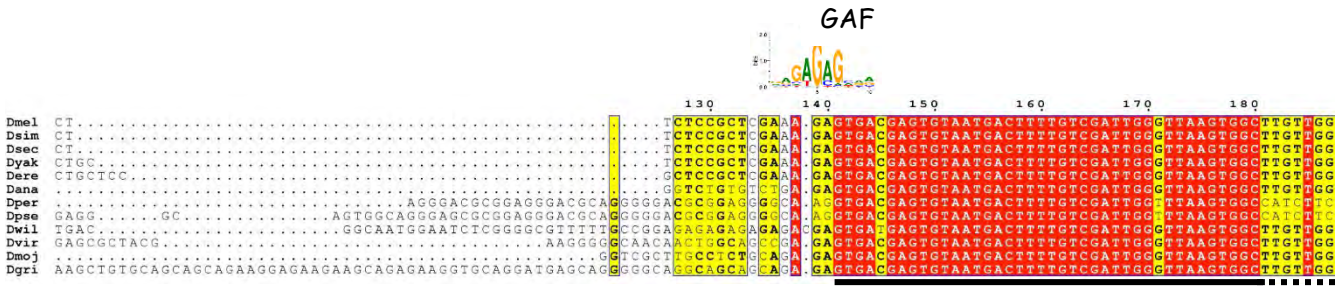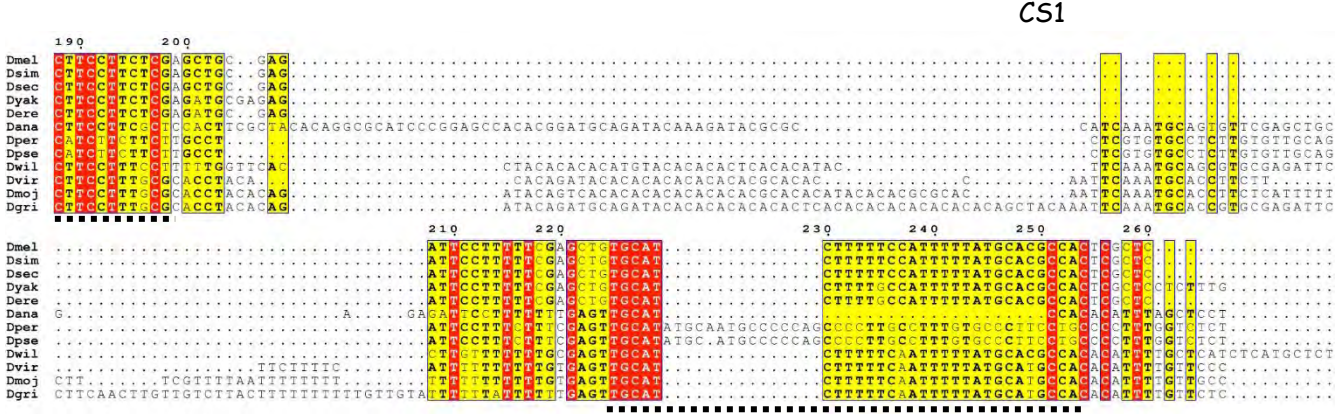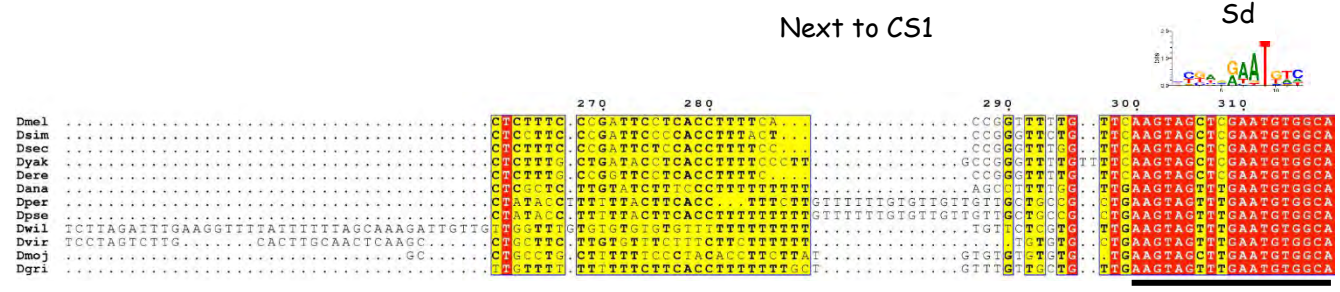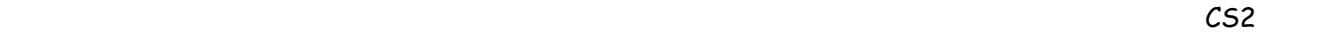

# BER<sup>OC56</sup> sequence conservation among Drosophilidae (Part2)

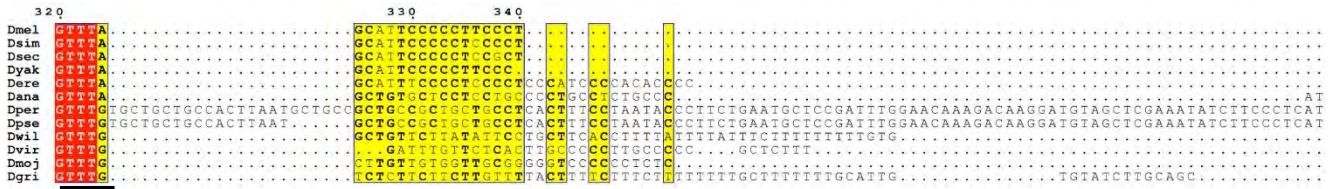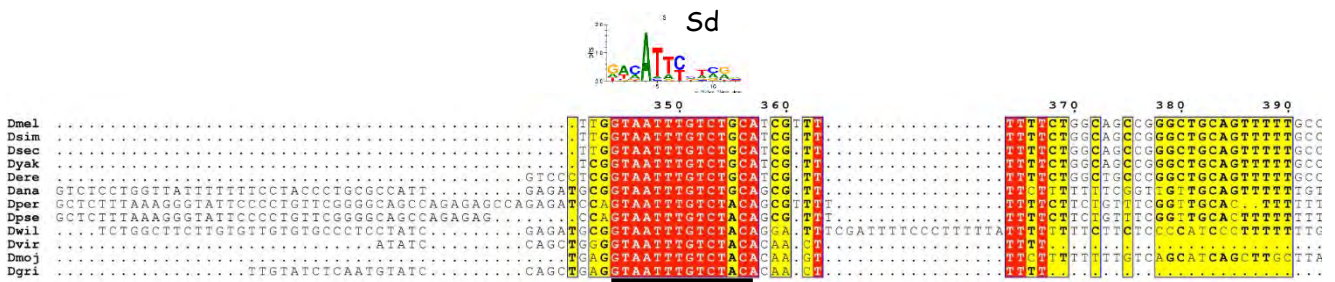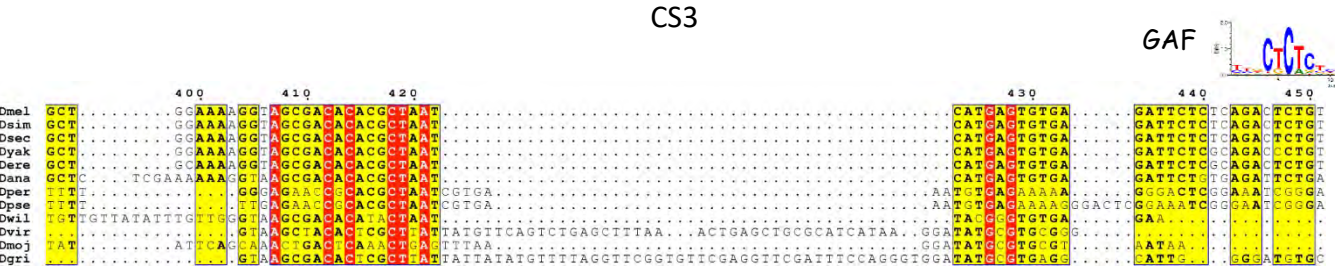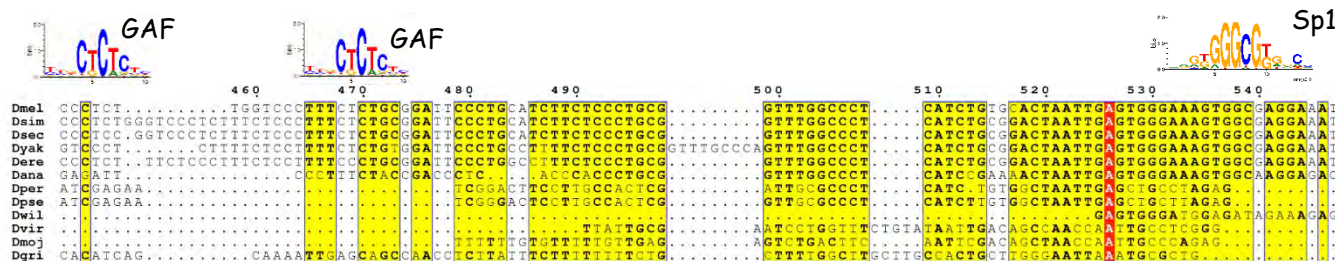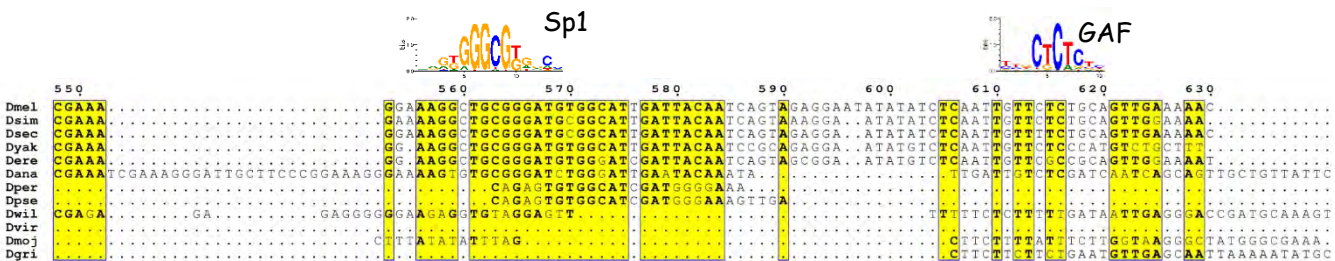

# BER<sup>OCST</sup> sequence conservation among Drosophilidae (Part1)

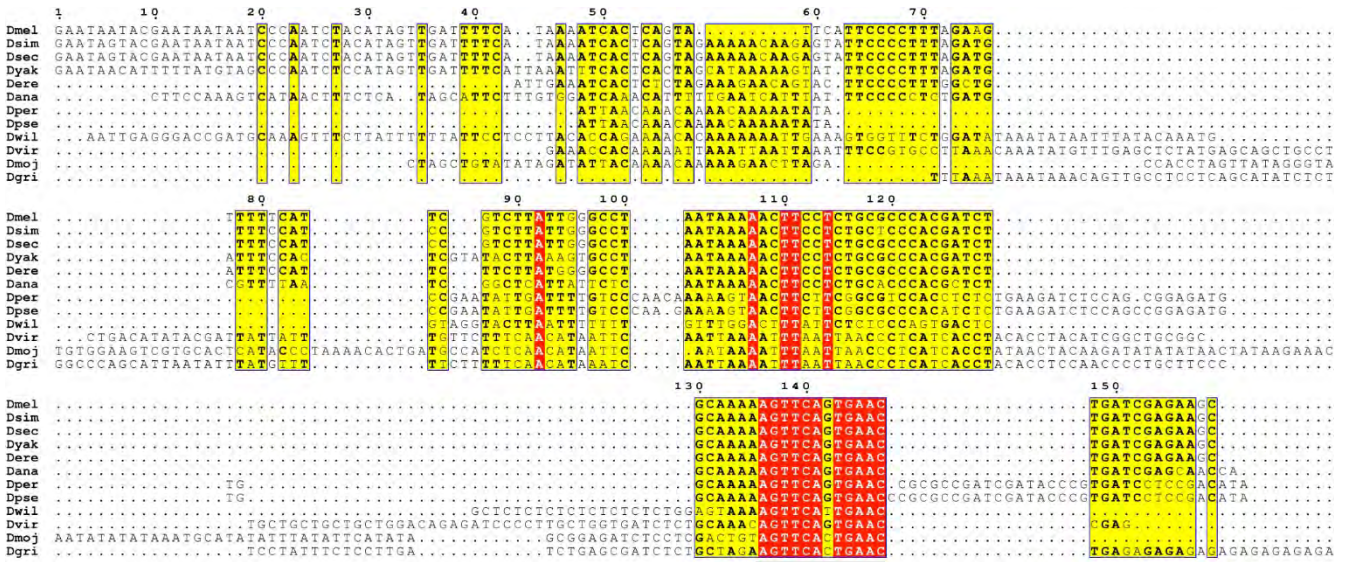

Eye/Antennal CS1

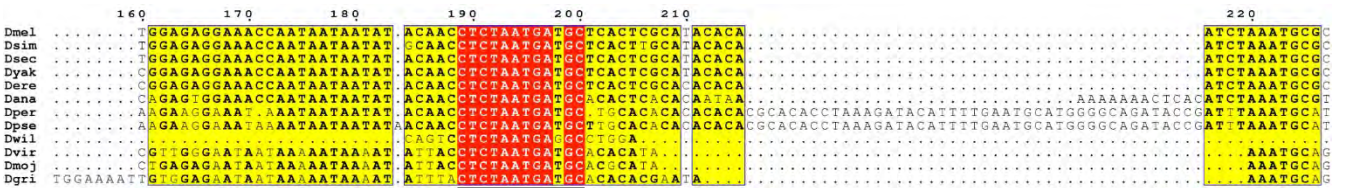

Eye/Antennal CS2

## BabCD

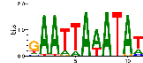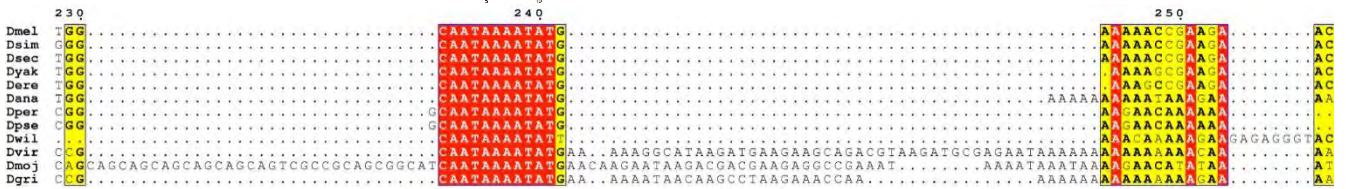

CS3

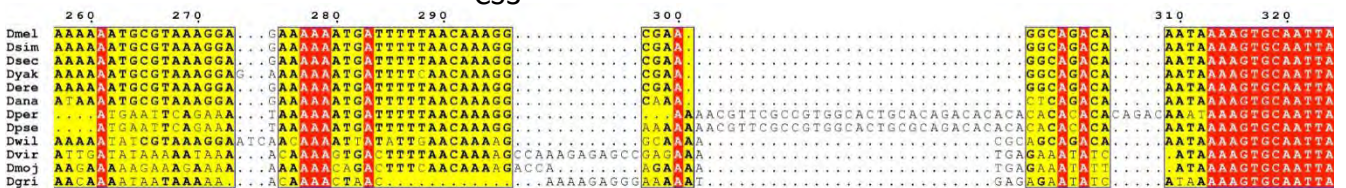

CS4









# BER<sup>OC</sup>S<sup>9</sup> sequence conservation among Drosophilidae (Part1)

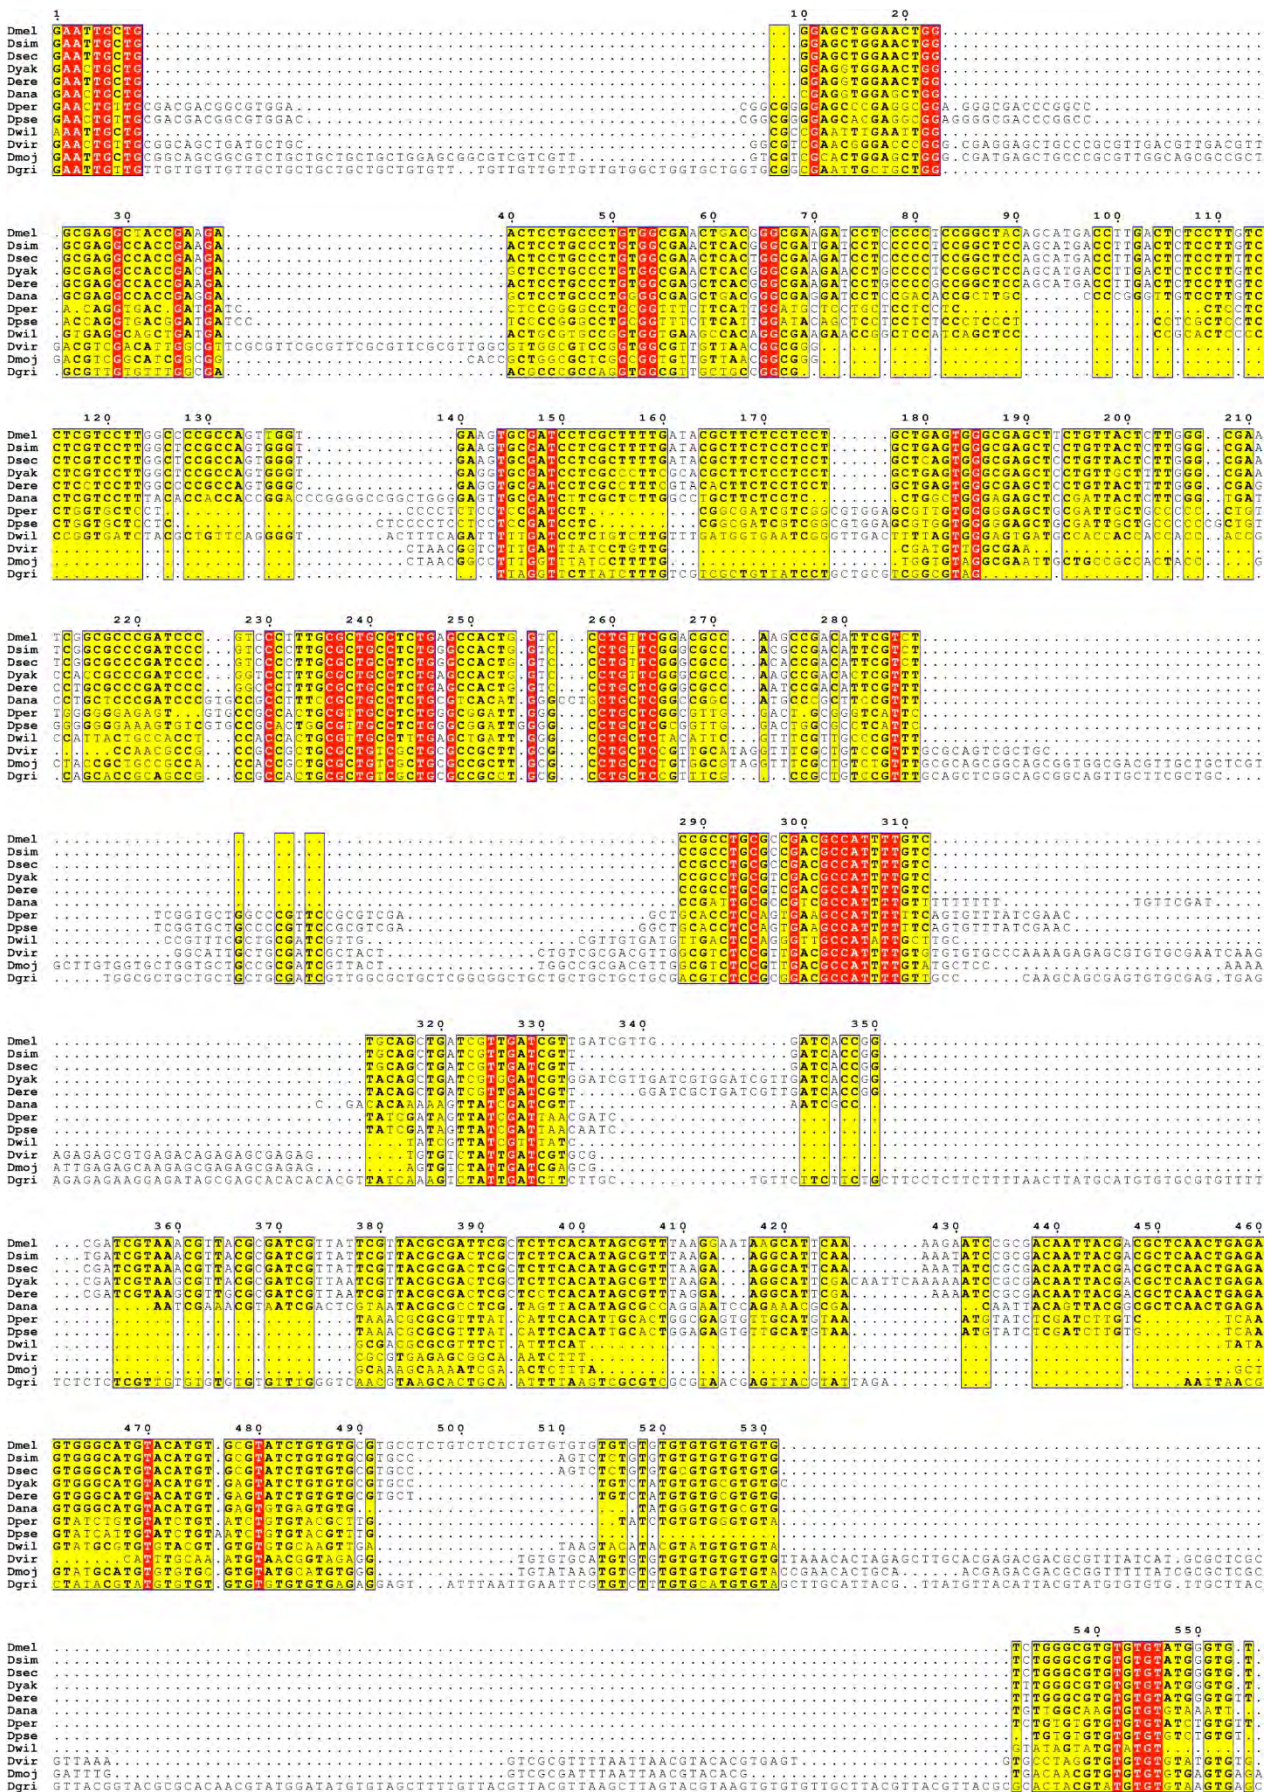

# BER<sup>OCs9</sup> sequence conservation among Drosophilidae (Part2)

Sequence alignment for positions 560-570. Species: Dmel, Dsim, Dsec, Dyak, Dere, Dana, Dper, Dpse, Dwil, Dvir, Dmoj, Dgri. Conserved regions are highlighted in yellow and red.

Sequence alignment for positions 580-620. Conserved regions are highlighted in yellow and red.

Sequence alignment for positions 630-700. Conserved regions are highlighted in yellow and red.

Sequence alignment for positions 710-810. Conserved regions are highlighted in yellow and red.

Sequence alignment for positions 820-870. Conserved regions are highlighted in yellow and red.

Sequence alignment for positions 880-950. Conserved regions are highlighted in yellow and red.

Sequence alignment for positions 960-1030. Conserved regions are highlighted in yellow and red.

Sequence alignment for positions 1040-1070. Conserved regions are highlighted in yellow and red.

Sequence alignment for positions 1080-1090. Conserved regions are highlighted in yellow and red.

## CS1 (promoter region)



# BER<sup>OC</sup>S10 sequence conservation among Drosophilidae (Part1)

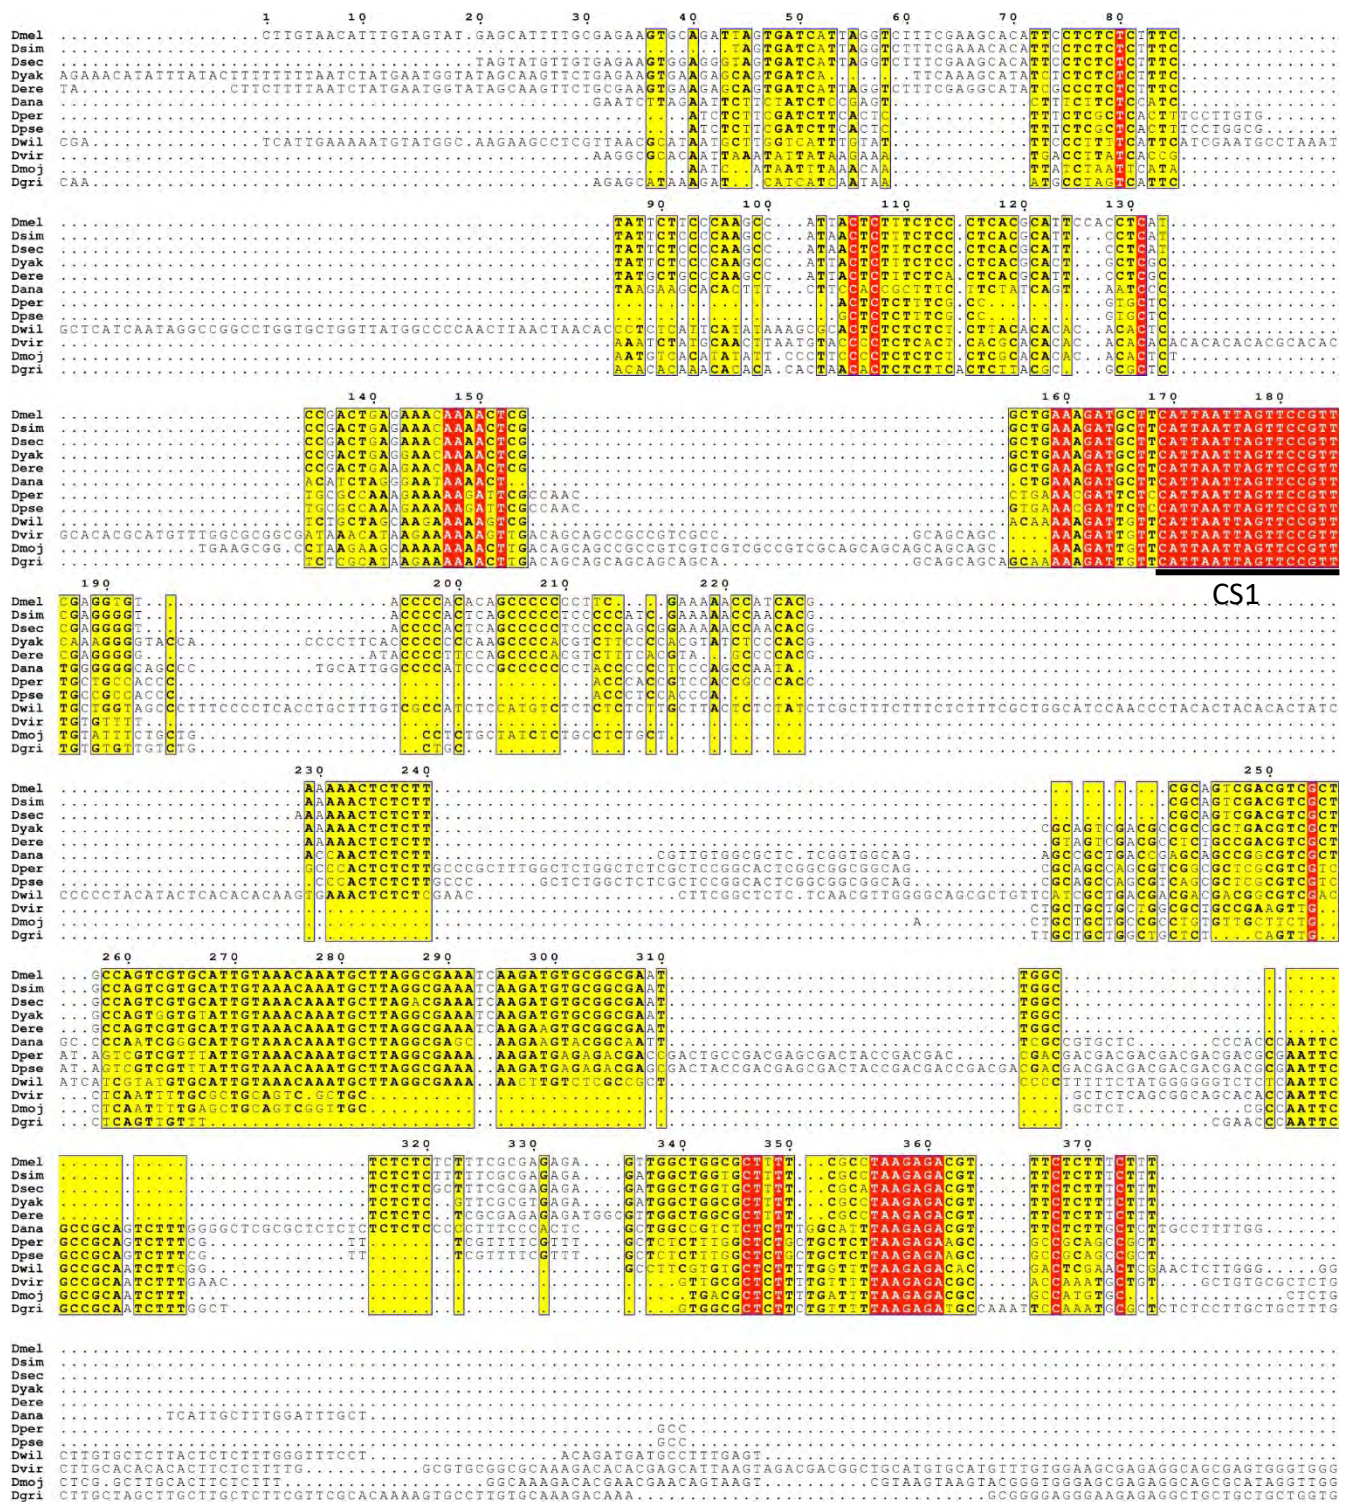





# LAE sequence conservation among Drosophilidae (Part1)

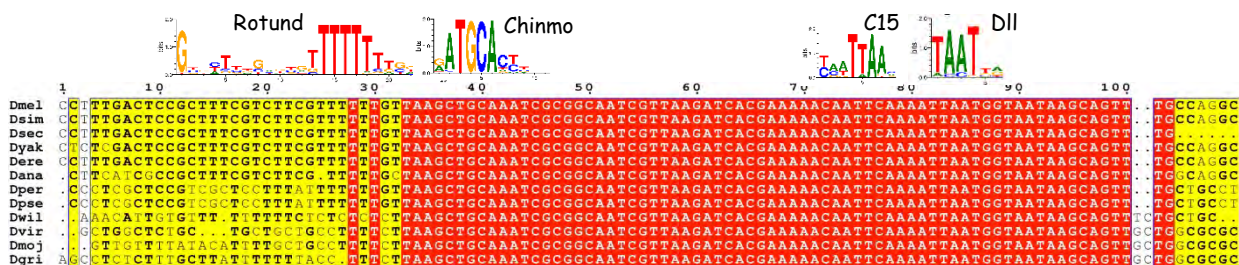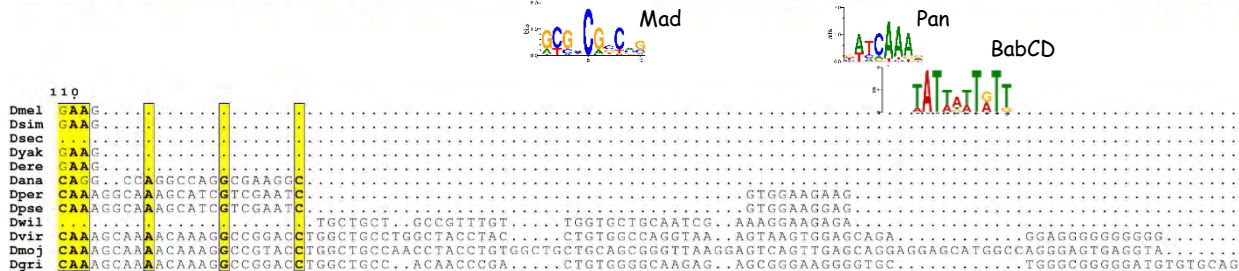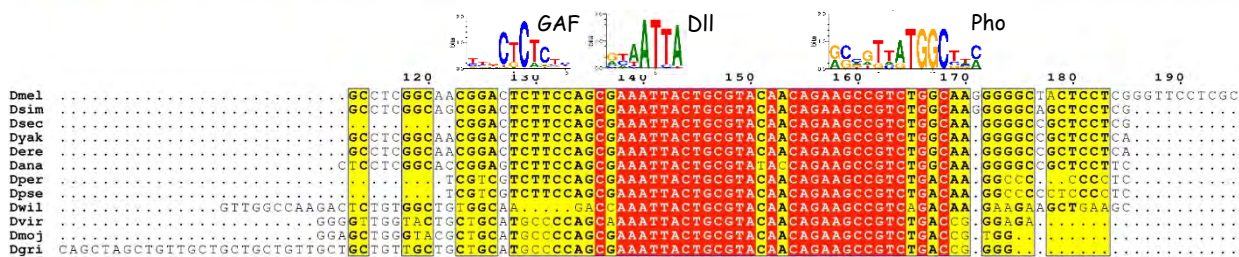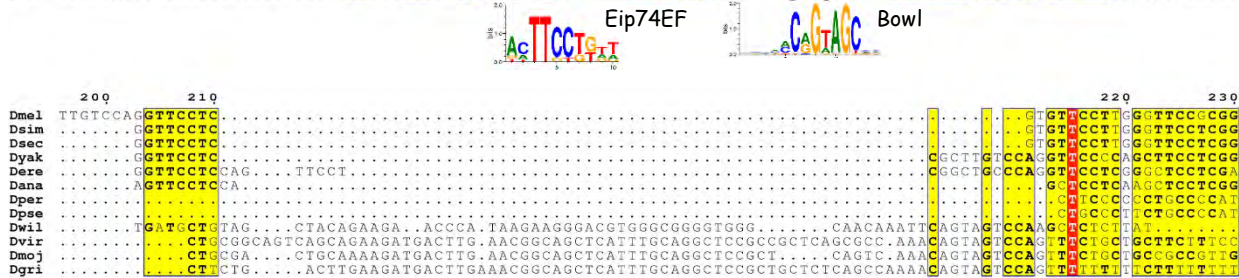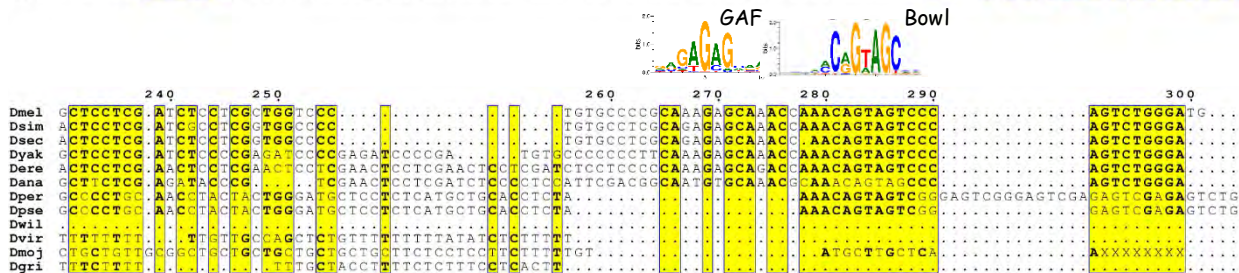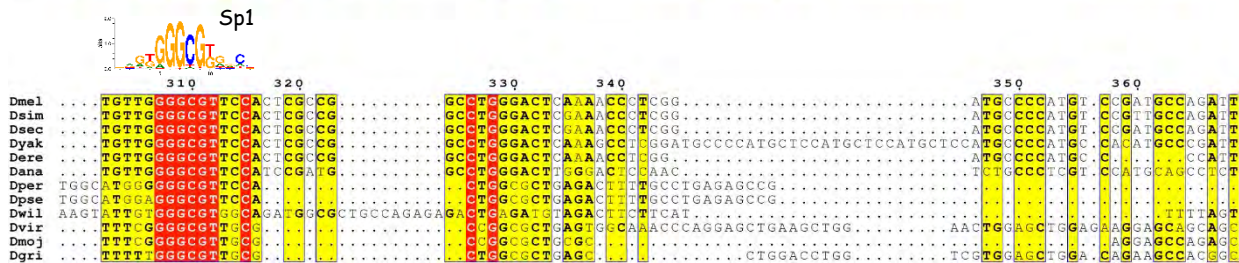

# LAE sequence conservation among Drosophilidae (Part2)

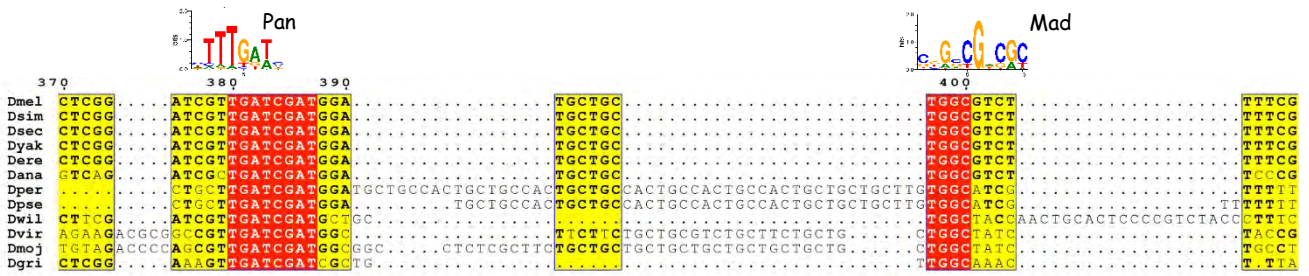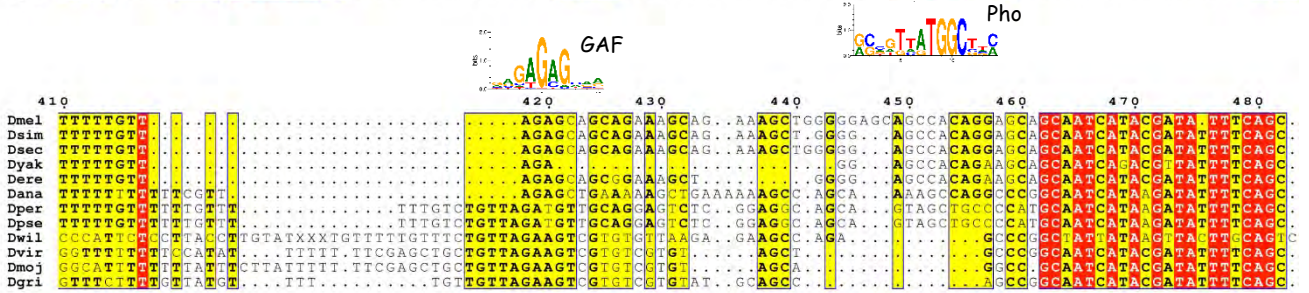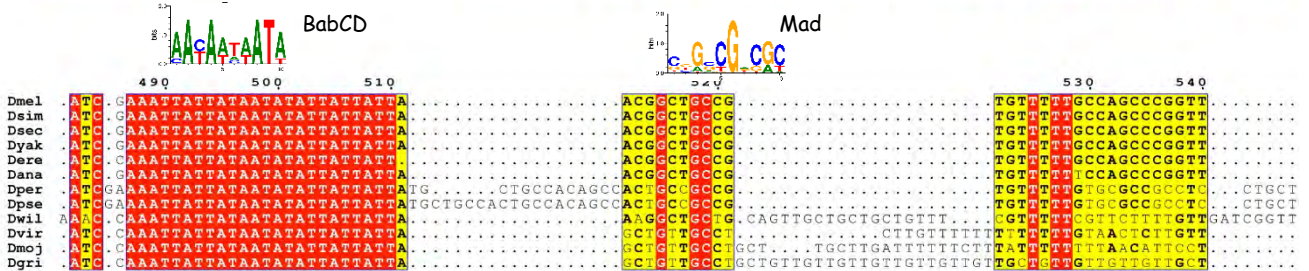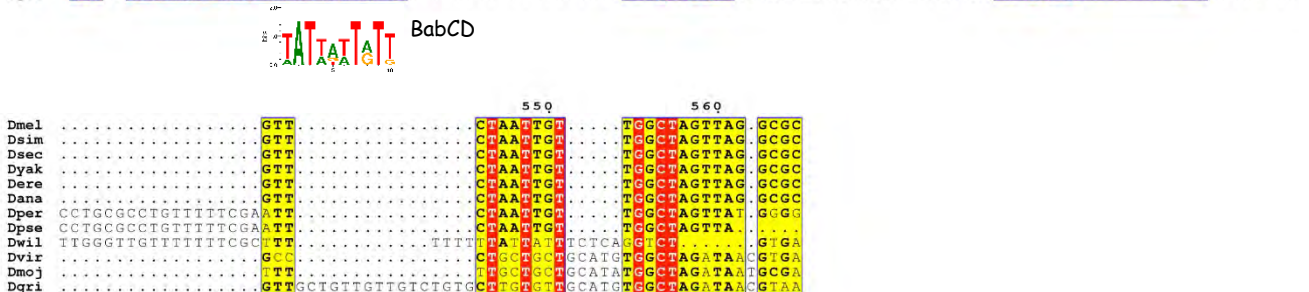

# Cardiac CE sequence conservation among Drosophilidae (Part1)

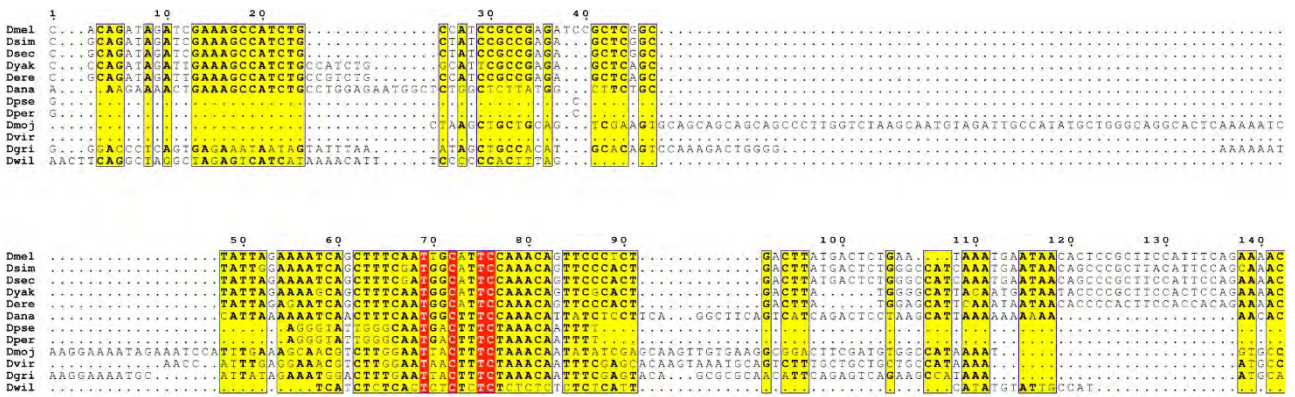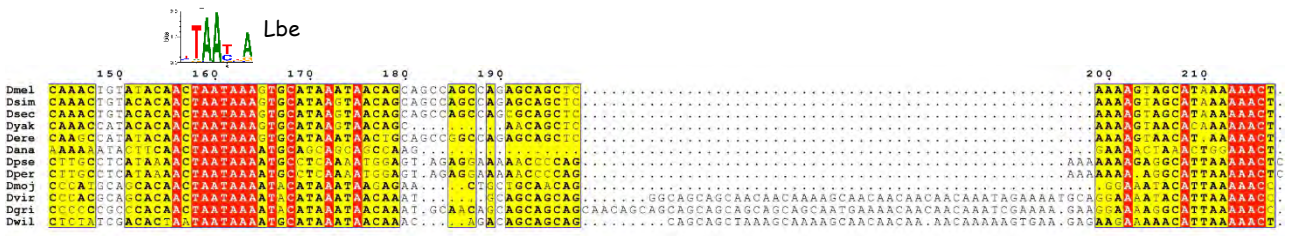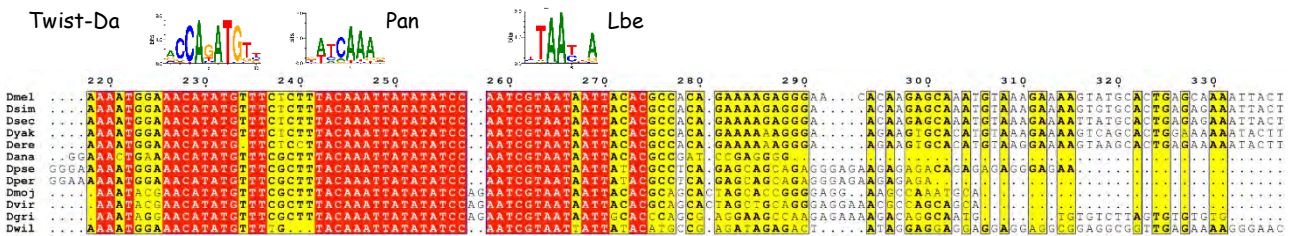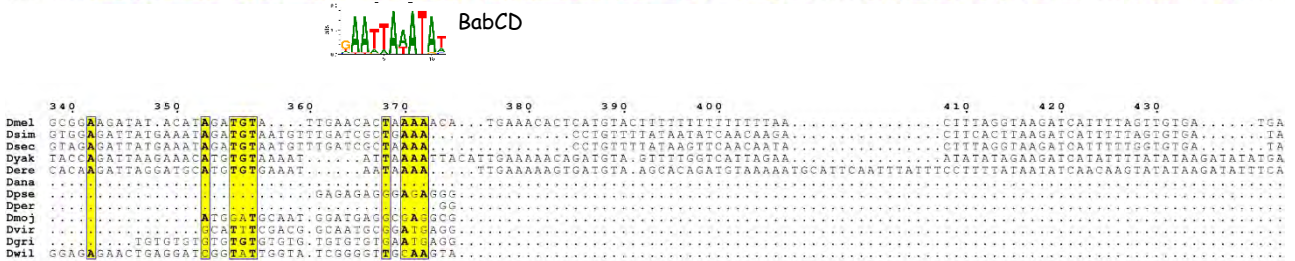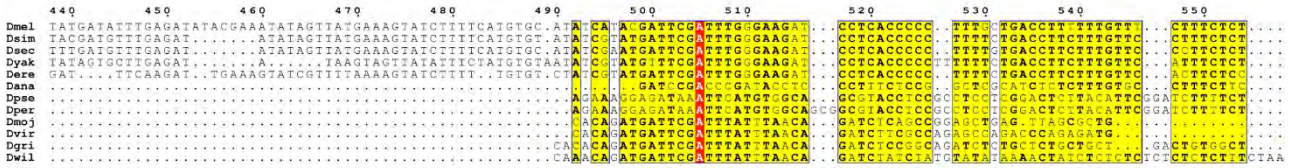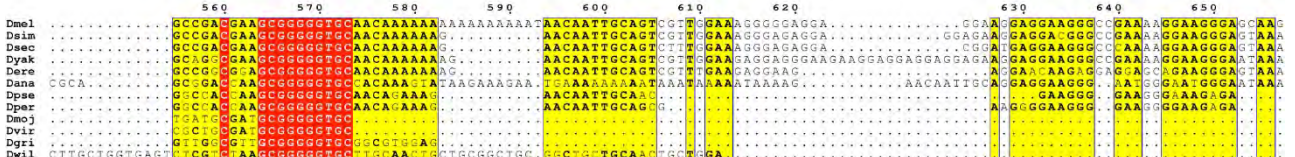

# Cardiac CE sequence conservation among Drosophilidae (Part2)

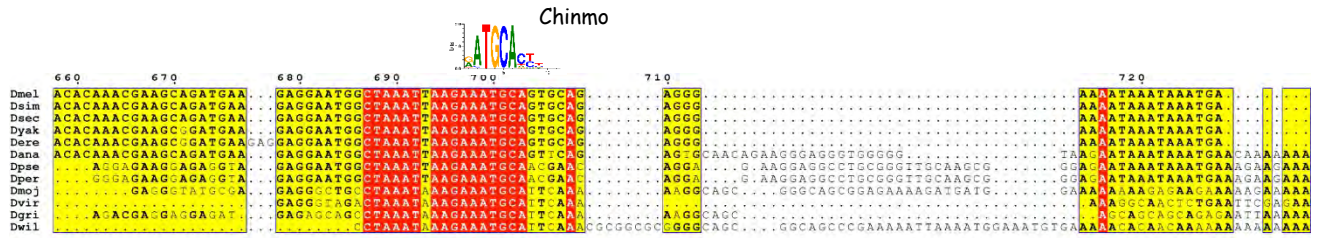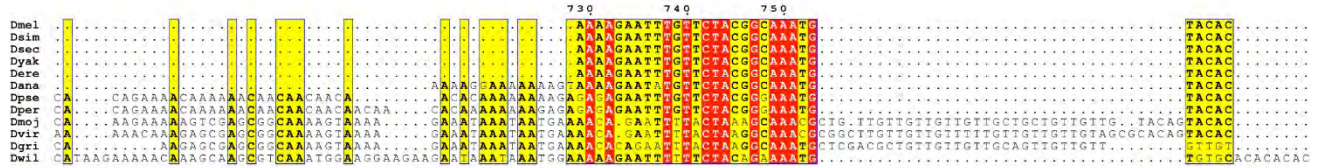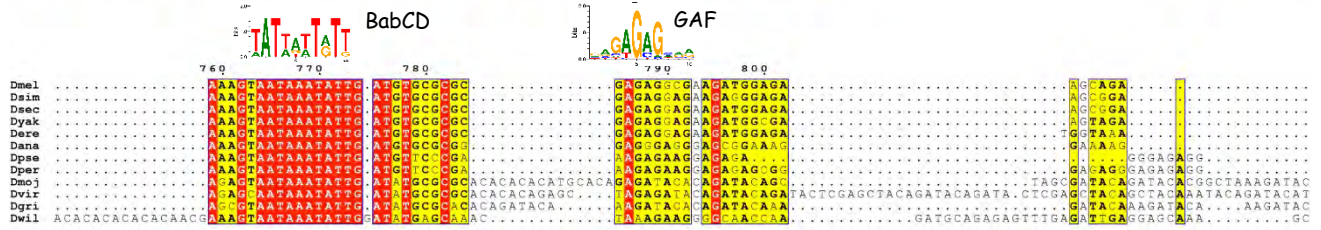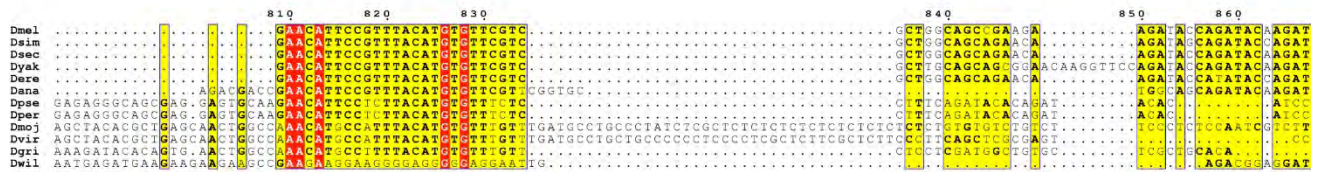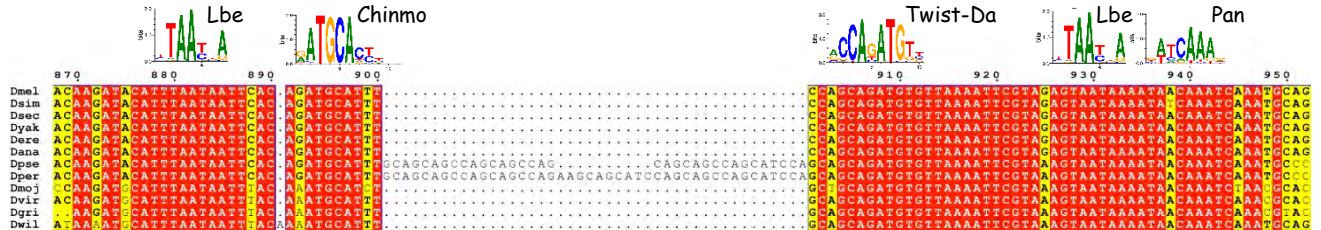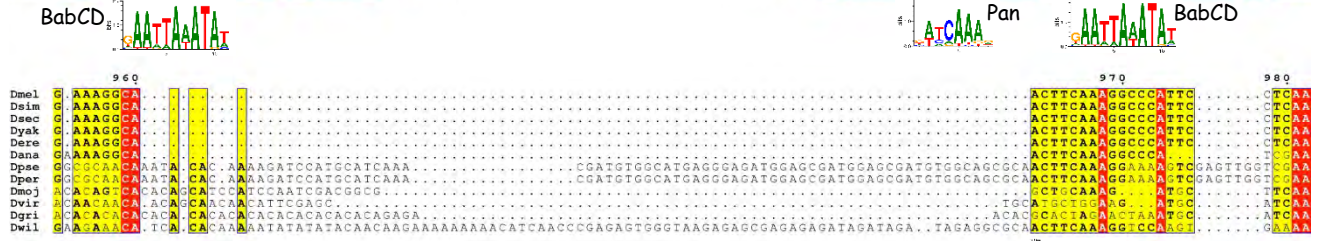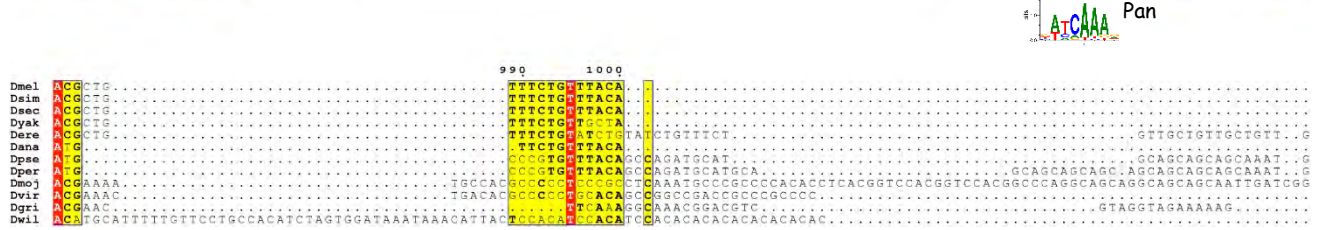

# Abdominal AE sequence conservation among Drosophilidae (Part1)

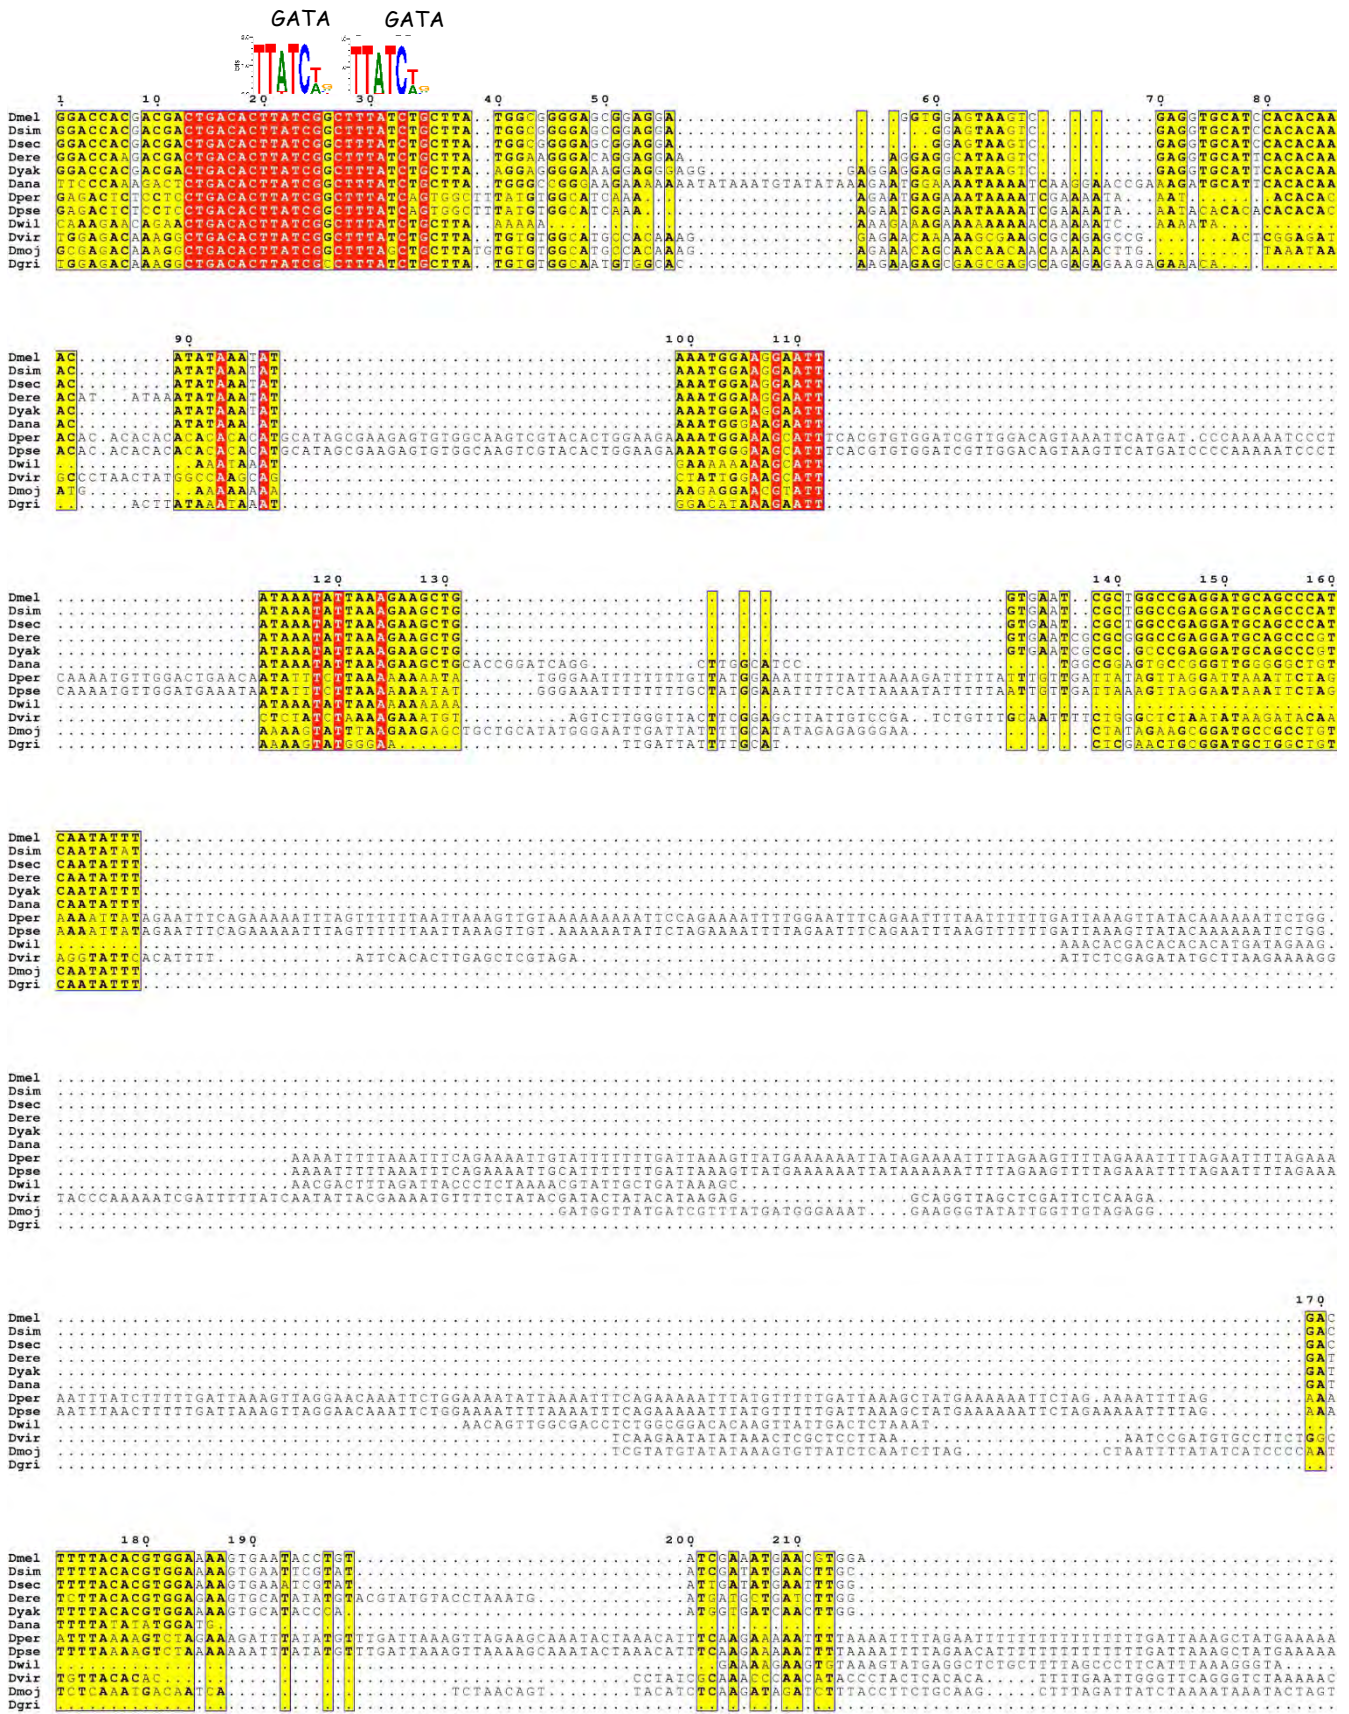





# Abdominal AE sequence conservation among Drosophilidae (Part4)

Sequence alignment showing conservation across species (Dmel, Dsdim, Dssec, Dderek, Ddyak, Ddana, Ddper, Ddpse, Ddwil, Ddvir, Ddmoj, Ddgr1) from position 930 to 970. Conserved regions are highlighted in yellow and red.

Sequence alignment showing conservation across species (Dmel, Dsdim, Dssec, Dderek, Ddyak, Ddana, Ddper, Ddpse, Ddwil, Ddvir, Ddmoj, Ddgr1) from position 980 to 1040. Conserved regions are highlighted in yellow and red.

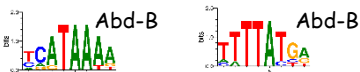

Sequence alignment showing conservation across species (Dmel, Dsdim, Dssec, Dderek, Ddyak, Ddana, Ddper, Ddpse, Ddwil, Ddvir, Ddmoj, Ddgr1) from position 1050 to 1100. Conserved regions are highlighted in yellow and red.

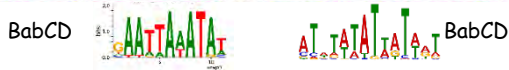



# Abdominal DE sequence conservation among Drosophilidae (Part1)

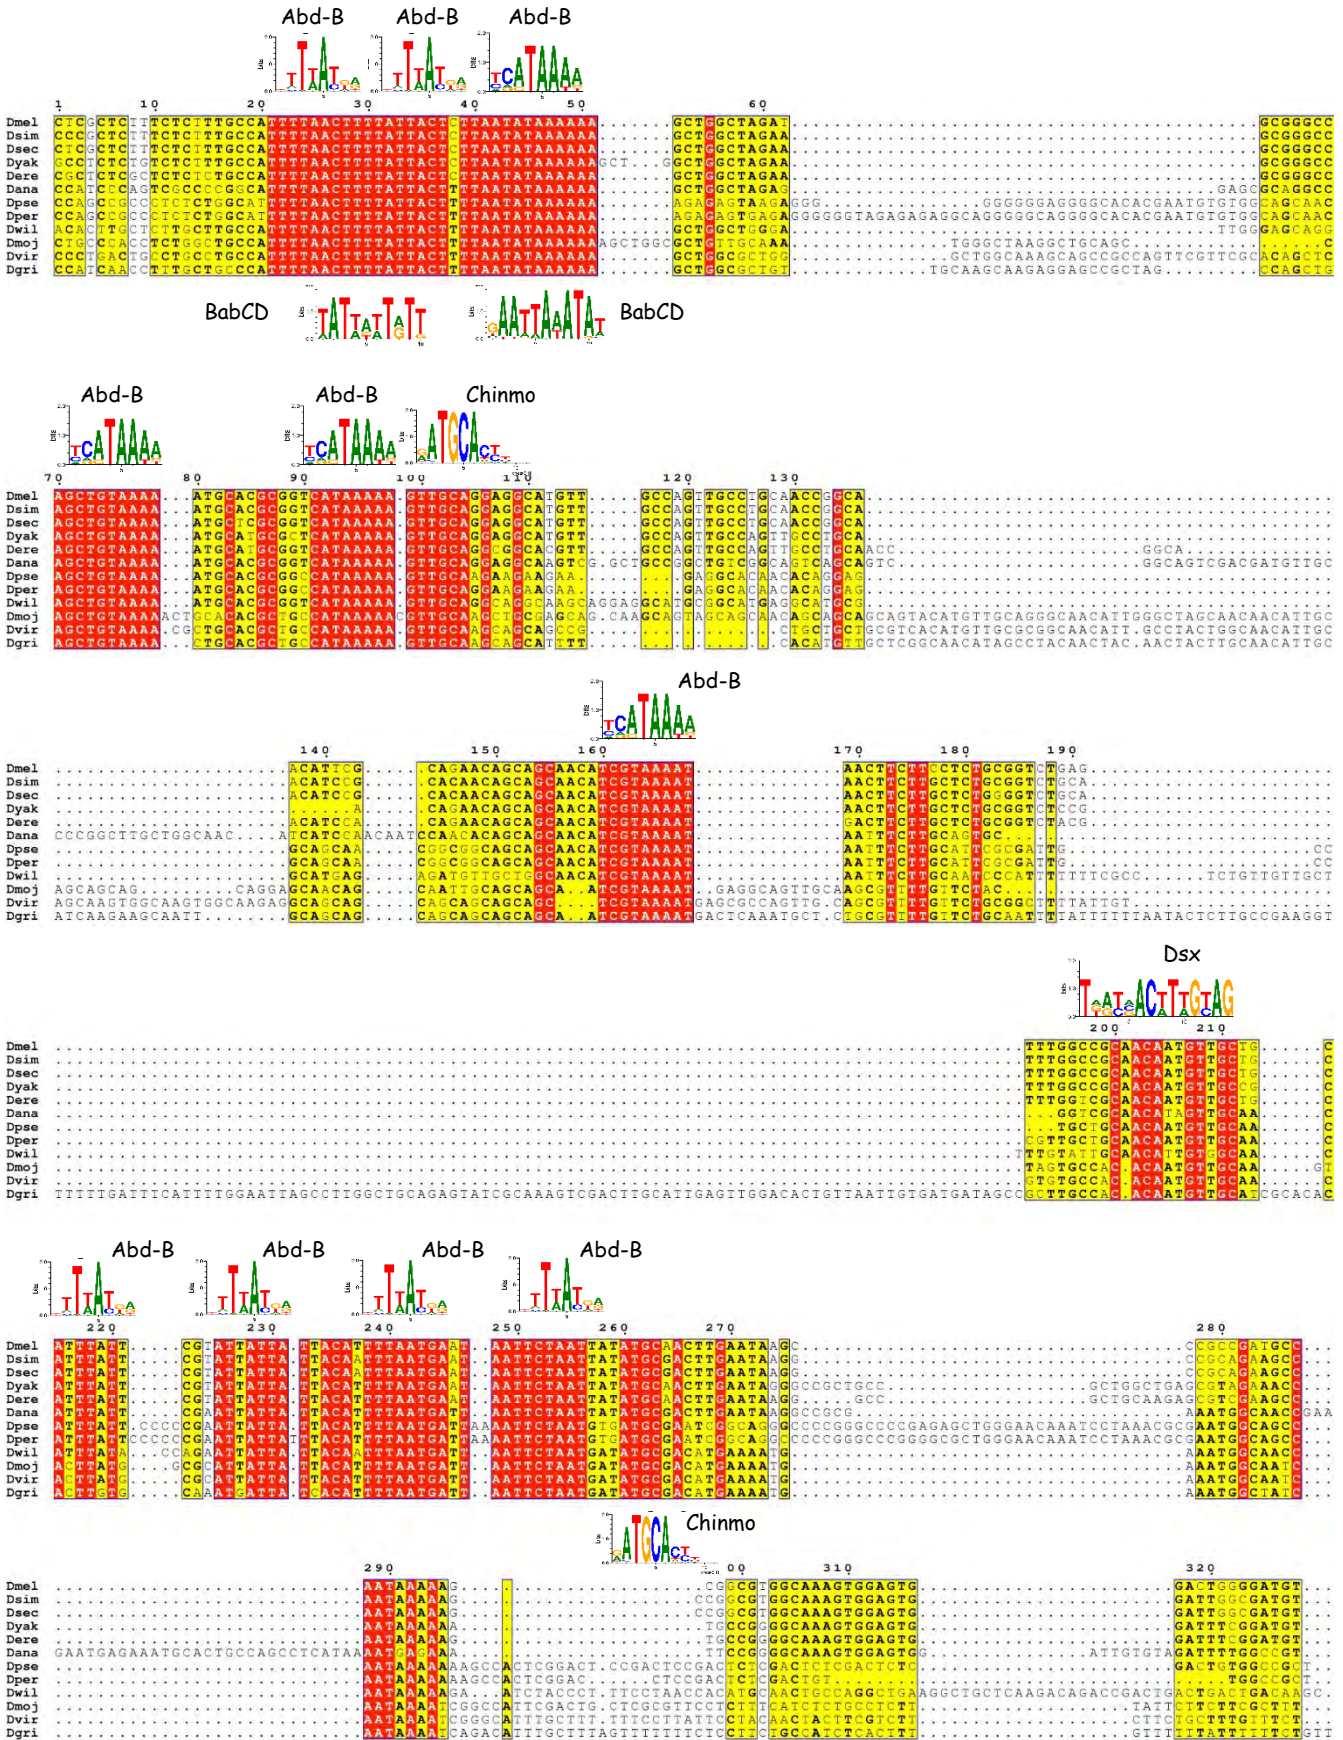

Source: https://biorxiv.org/content/10.1101/2021.03.25.436949v1.full.pdf
